# Supplementary material
Source: PubMed Central journal article supplement (PMC5788404)

# **Group-based optimization of potent and cell-active inhibitors of the von Hippel-Lindau (VHL) E3 ubiquitin ligase: structure-activity relationships leading to the chemical probe VH298**

**Pedro Soares<sup>†</sup>, Morgan S. Gadd<sup>†</sup>, Julianty Frost<sup>†‡</sup>, Carles Galdeano<sup>†</sup>, Lucy Ellis<sup>†</sup>, Ola Epemolu<sup>†</sup>, Sonia Rocha<sup>‡</sup>, Kevin D. Read<sup>†</sup>, Alessio Ciulli<sup>†\*</sup>**

<sup>†</sup>Division of Biological Chemistry and Drug Discovery, School of Life Sciences, University of Dundee, Dow Street, Dundee, DD1 5EH, Scotland, UK. <sup>‡</sup>Center for Gene Regulation and Expression, School of Life Sciences, University of Dundee, Dow Street, Dundee, DD1 5EH, Scotland, UK.

## **Supporting Information**

### **Table of Contents**

#### **S2 - Supplementary Figures**

#### **S11 – FP Competition Assay Data**

#### **S22 – ITC Data**

#### **S26 – SPR Data**

#### **S30 – Evaluation of VHL inhibitors intracellular accumulation**

#### **S31 – X-ray Crystallography Data Processing and Refinement Statistics**

#### **S33 – <sup>1</sup>H and <sup>13</sup>C NMR spectra**

## Supplementary Figures

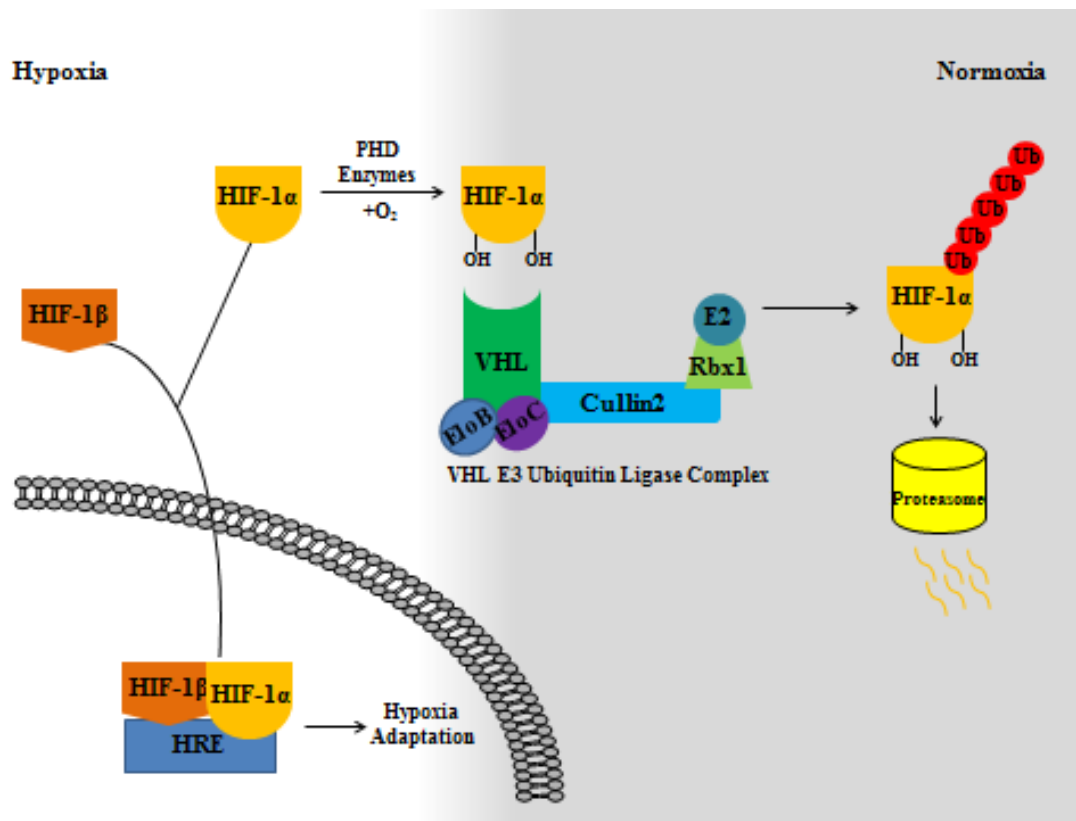

**Supplementary Figure 1.** Under normoxia conditions, HIF-1 $\alpha$  is hydroxylated, recognized by the CRL2<sup>VHL</sup> complex, poly ubiquitinated and target for hydrolysis by the proteasome. Under hypoxia conditions, HIF-1 $\alpha$  dimerizes with HIF-1 $\beta$  forming a transcriptionally active complex that binds to Hypoxia Response Elements, promoting hypoxia adaptation.

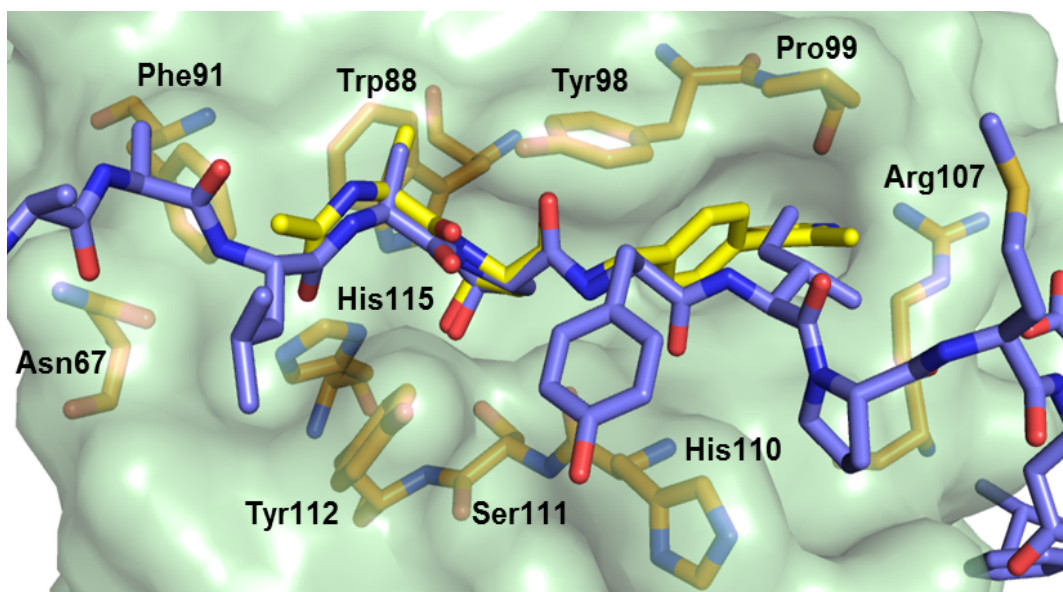

**Supplementary Figure 2.** Crystal structure of VBC in complex with HIF-1 $\alpha$  peptide (purple carbons PDB 4AJY) and inhibitor **11** (yellow carbons). VHL is shown as a pale green surface and the VHL residues forming the binding pocket as orange stick representations.

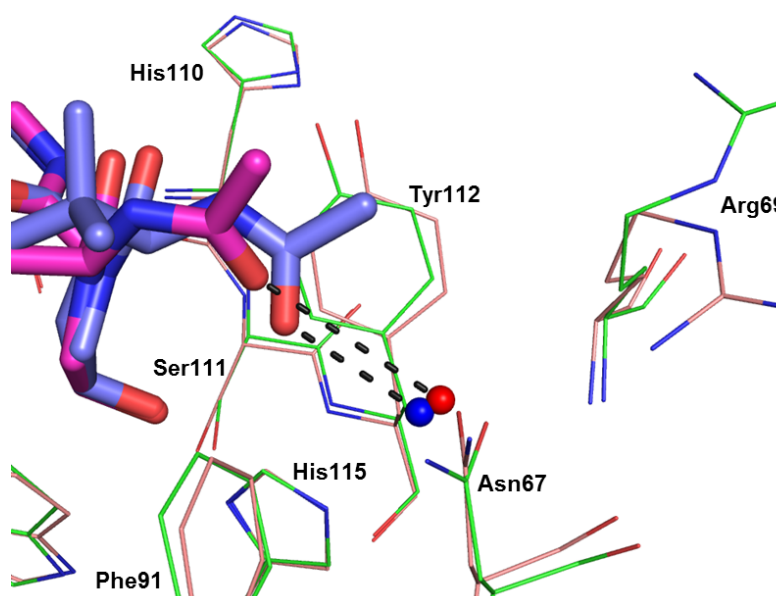

**Supplementary Figure 3.** Crystal structure of VBC in complex with inhibitor **VH032** (purple carbons PDB 4W9H) and inhibitor **11** (pink carbons). Residues forming the LHS of VHL pocket are shown as line representations (pink carbons **VH032** structure and green carbons inhibitor **11** structure). The structural water at the LHS is shown as a red sphere in

inhibitor **11** structure and as a blue sphere in **VH032** structure. Distances between inhibitors LHS carbonyl and respective structural waters are shown as black dashed lines.

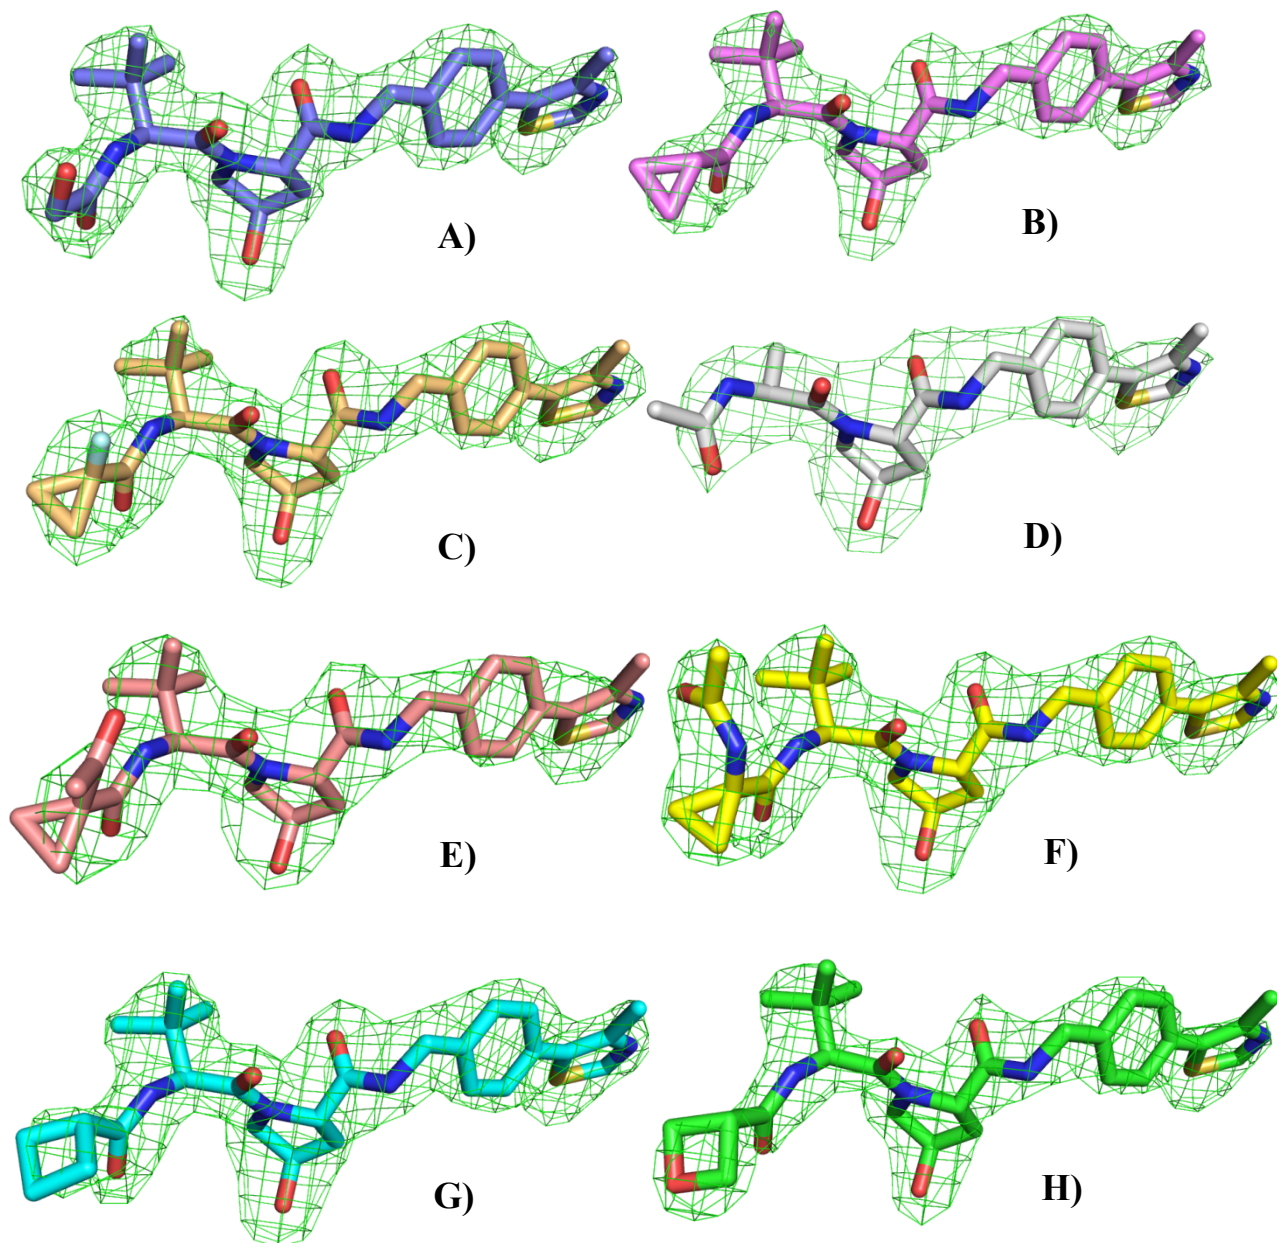

**Supplementary Figure 4.** Electron density at ligand binding sites. Ligands A) **3**; B) **6**; C) **10**; D) **11**; E) **16**; F) **17**; G) **18**; H) **19** shown as sticks bound to the complex of VBC (not shown). An omit map ( $F_o - F_c$ ) is shown in green contoured at  $3\sigma$  around each modelled ligand with a carve radius of  $1.6 \text{ \AA}$ .

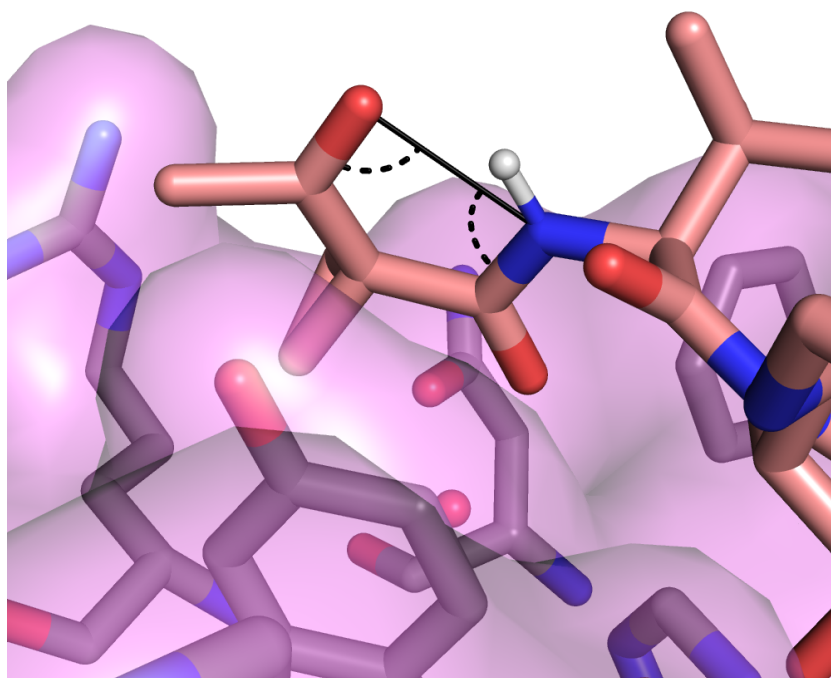

**Supplementary Figure 5.** Crystal structure of VBC in complex with inhibitor **16** (pink carbons). VHL is shown as purple pale surface and residues forming the LHS of VHL pocket are shown grey stick representation. Structural water is shown as a red sphere. Distance and angles are shown as black continuous and dashed lines respectively.

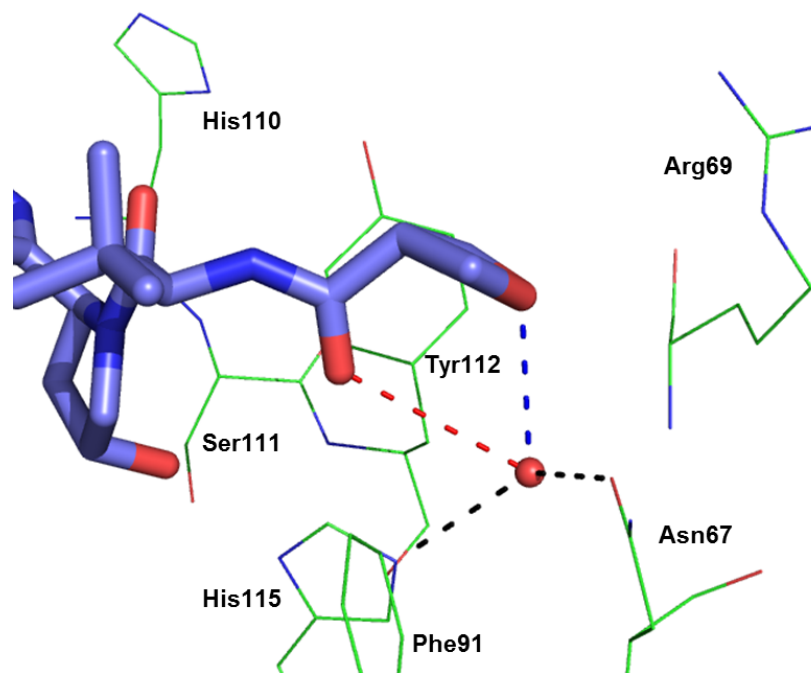

**Supplementary Figure 6.** Crystal structure of VBC in complex with inhibitor **19** (purple carbons). Residues forming the LHS of VHL pocket are shown as line representations (green carbons). The structural water at the LHS is shown as a red sphere. Distances between inhibitor oxygen of oxetane and inhibitor LHS amide carbonyl with structural water are shown as blue and red dashed lines respectively. Distances between structural water and residues on the LHS of the pocket are shown as black dashed lines

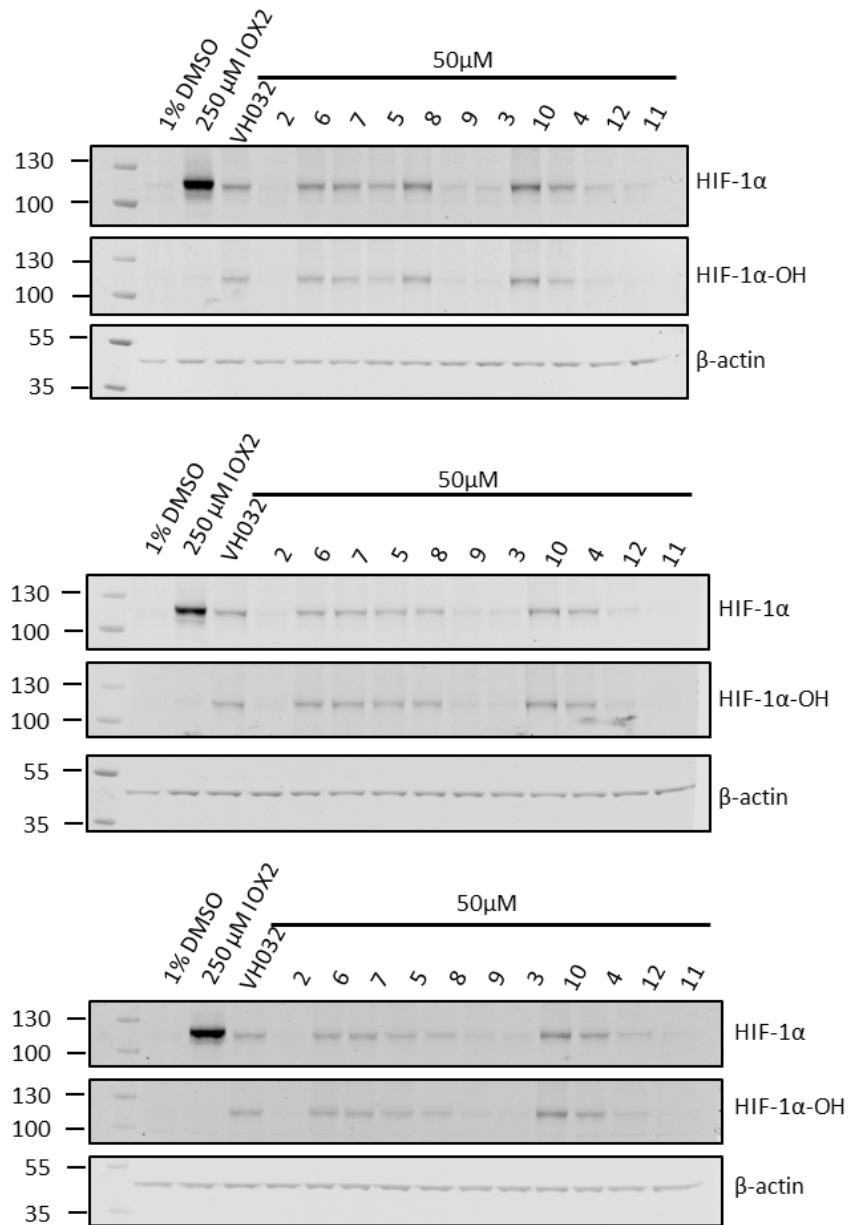

**Supplementary Figure 7.** Immunoblots of HIF- $\alpha$  subunits in HeLa cells treated with 50  $\mu$ M of VHL inhibitors **VH032** and **2-12**; 1% DMSO, 250  $\mu$ M IOX2 for 2h.

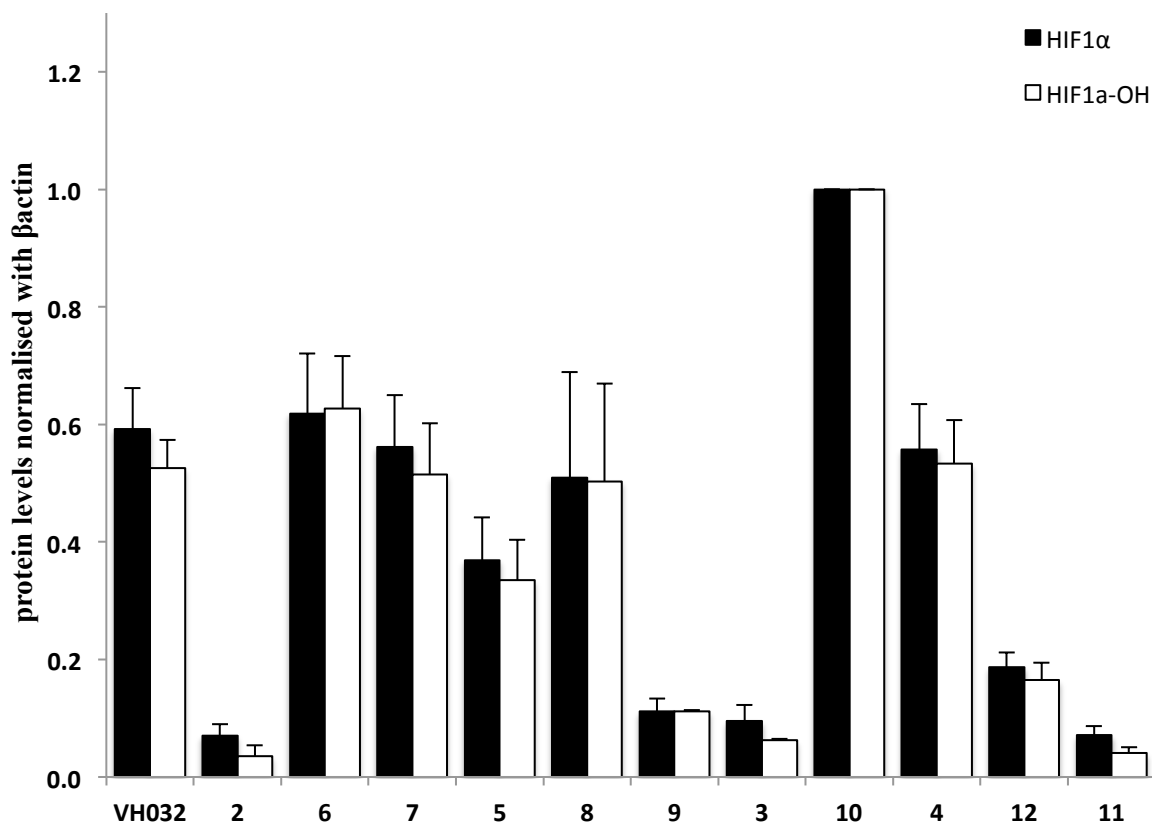

**Supplementary Figure 8.** Quantification of HIF-1 $\alpha$  stabilization levels in HeLa cells for compounds **VH032** and **2–12** measured by Western Blot (SI Figure 7) after 2h treatment. The assay was performed in triplicate; protein levels were normalized to  $\beta$ -actin levels and are reported as mean  $\pm$  st. dev. relative to compound **10**. IOX2 was used as positive control and cells treated with DMSO vehicle were used as negative control.



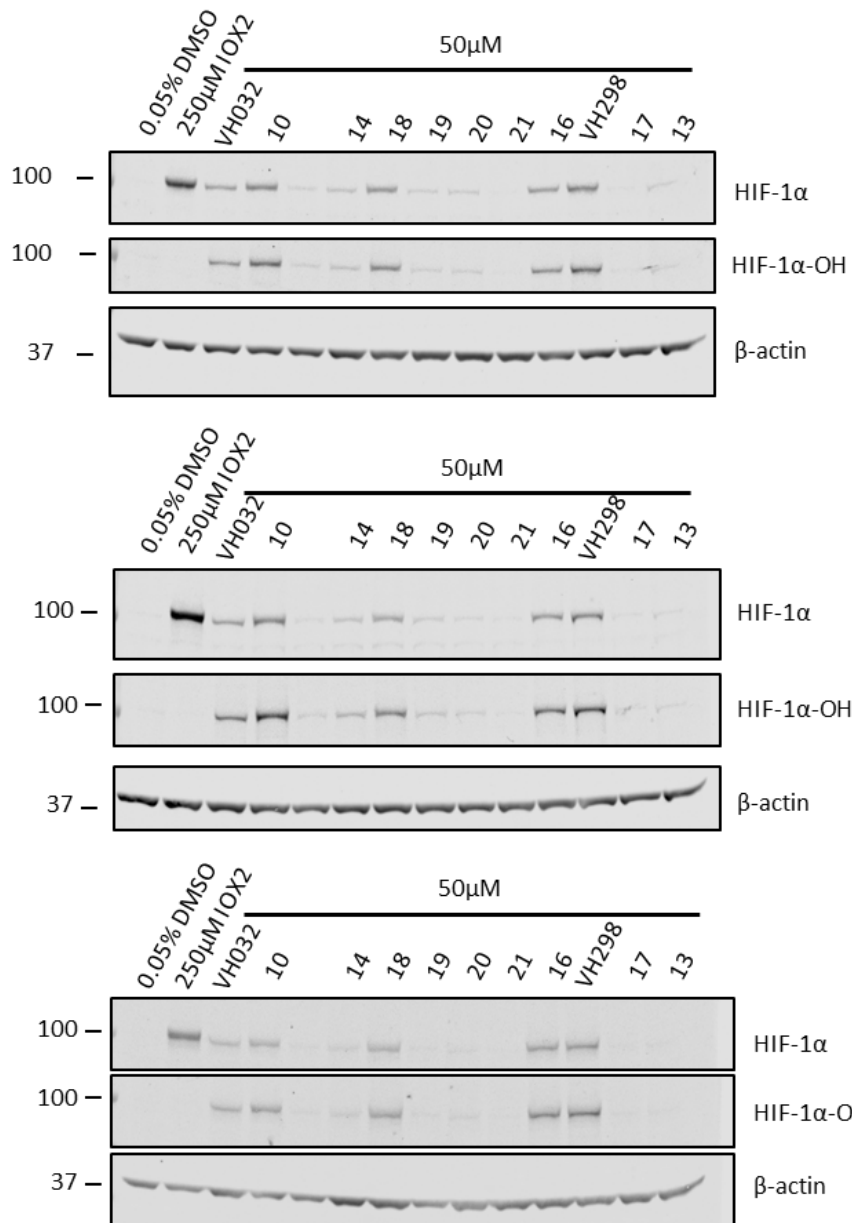

**Supplementary Figure 9.** Immunoblots of HIF- $\alpha$  subunits in HeLa cells treated with 50  $\mu$ M of VHL inhibitors **VH032, 10, 13, 14, VH298, 16-21**; 1% DMSO, 250  $\mu$ M IOX2 for 2h.

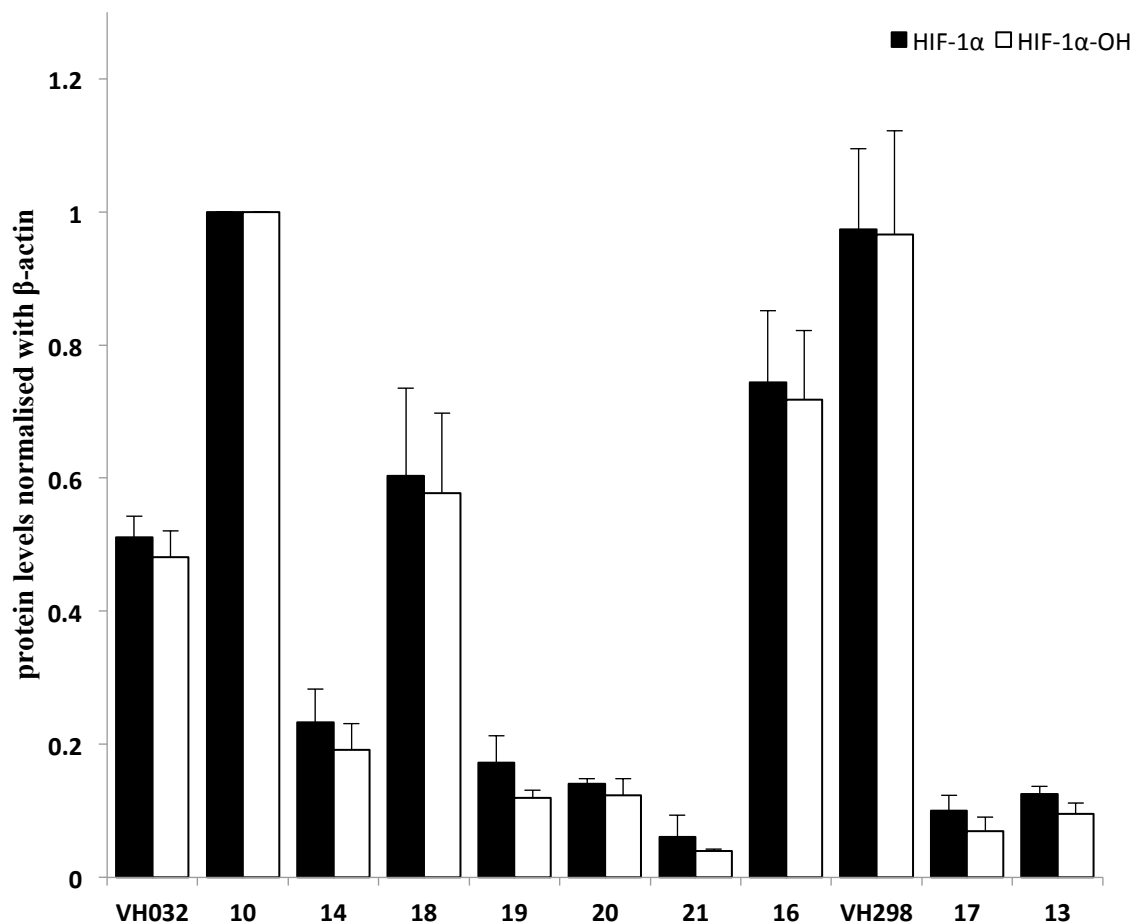

**Supplementary Figure 10.** Quantification of HIF-1 $\alpha$  stabilization levels in HeLa cells for compounds VH032, VH298, 10 and 13-21 measured by Western Blot (SI Figure 9) after 2h treatment. The assay was performed in triplicate; protein levels were normalized to  $\beta$ -actin levels and are reported as mean  $\pm$  st. dev. relative to compound **10**. IOX2 was used as positive control and cells treated with DMSO vehicle were used as negative control.

## Florescence Polarization Competition Assay Graphs

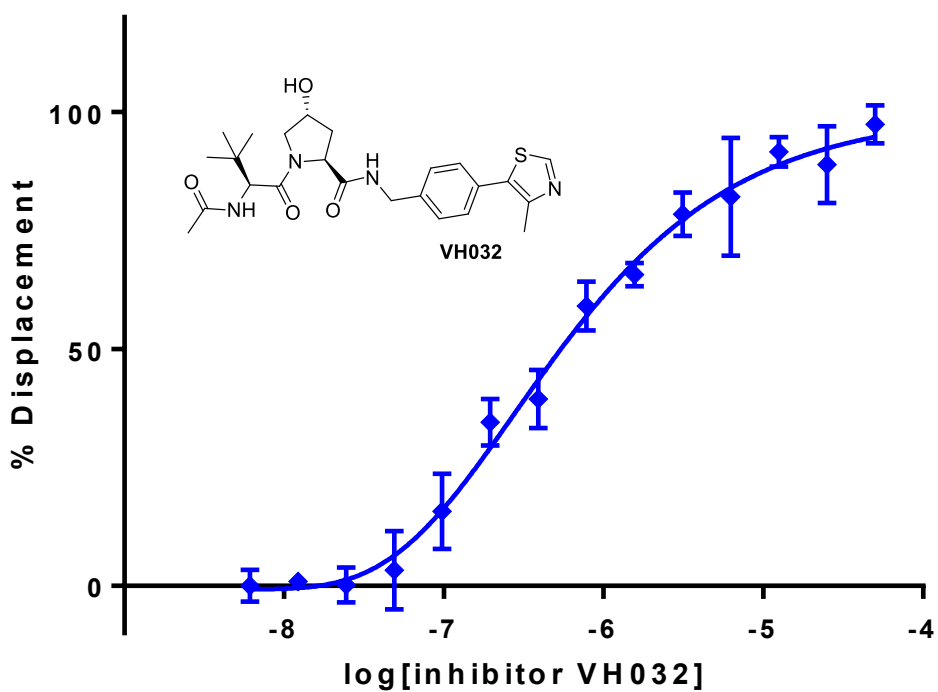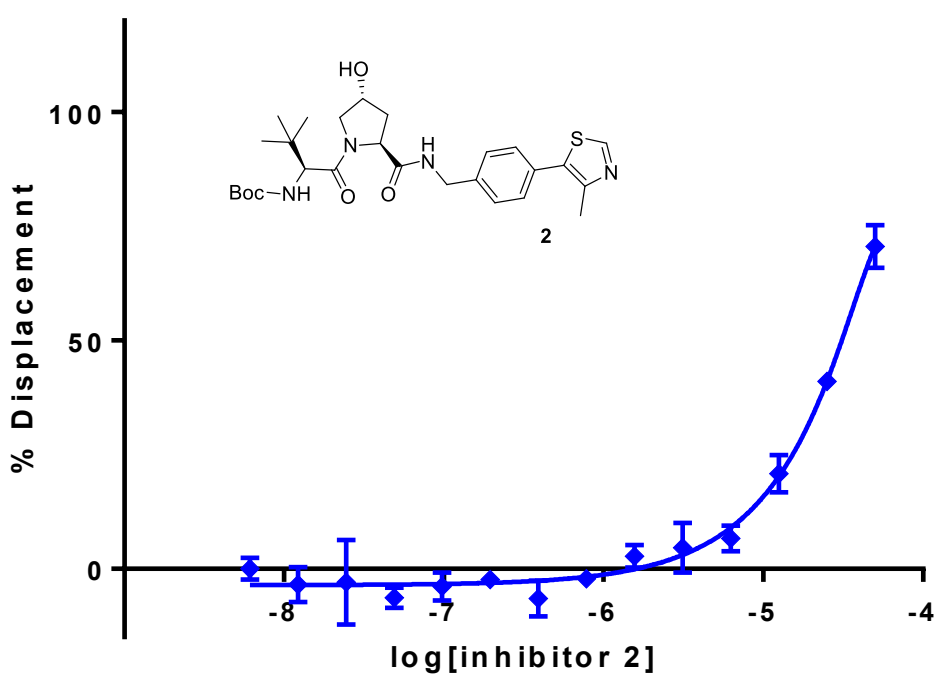

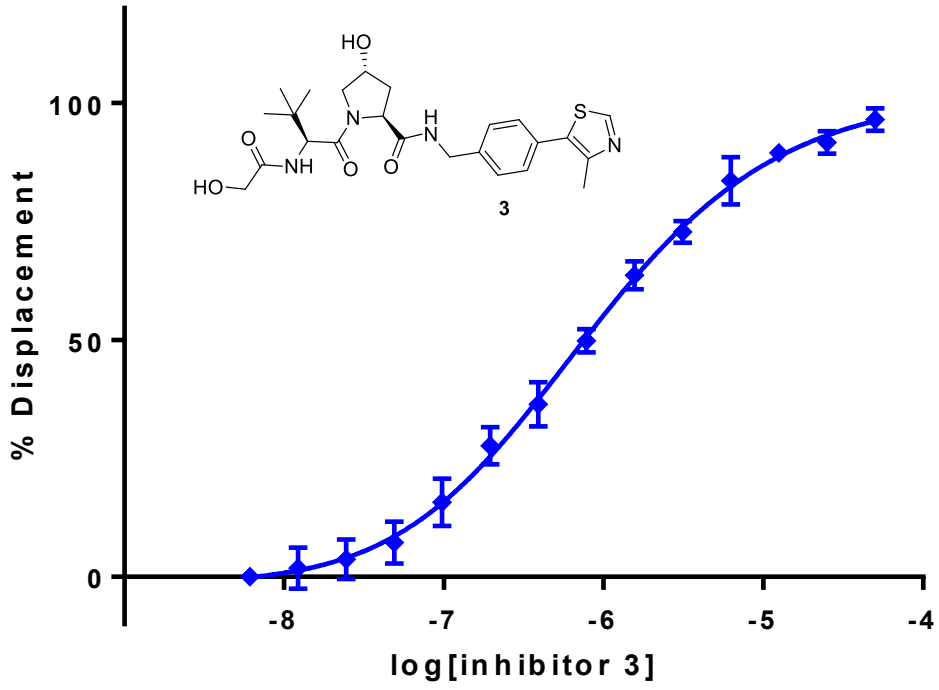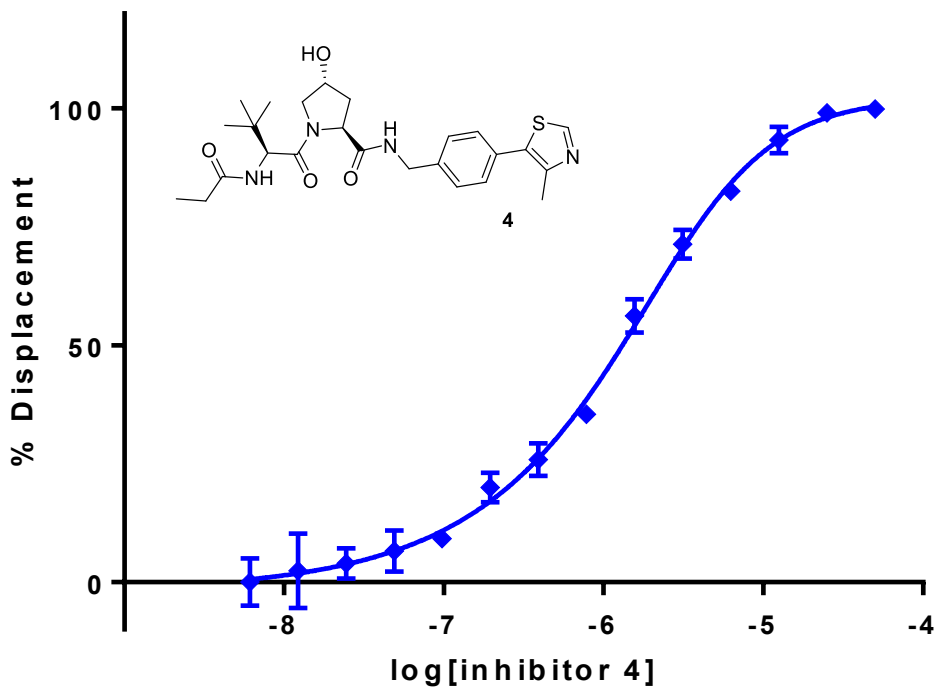

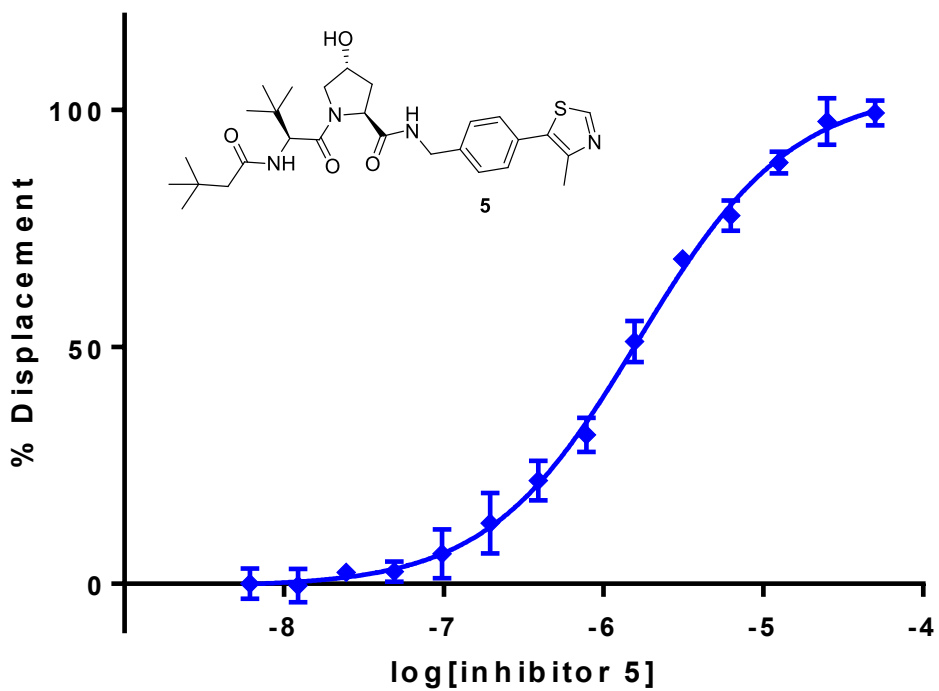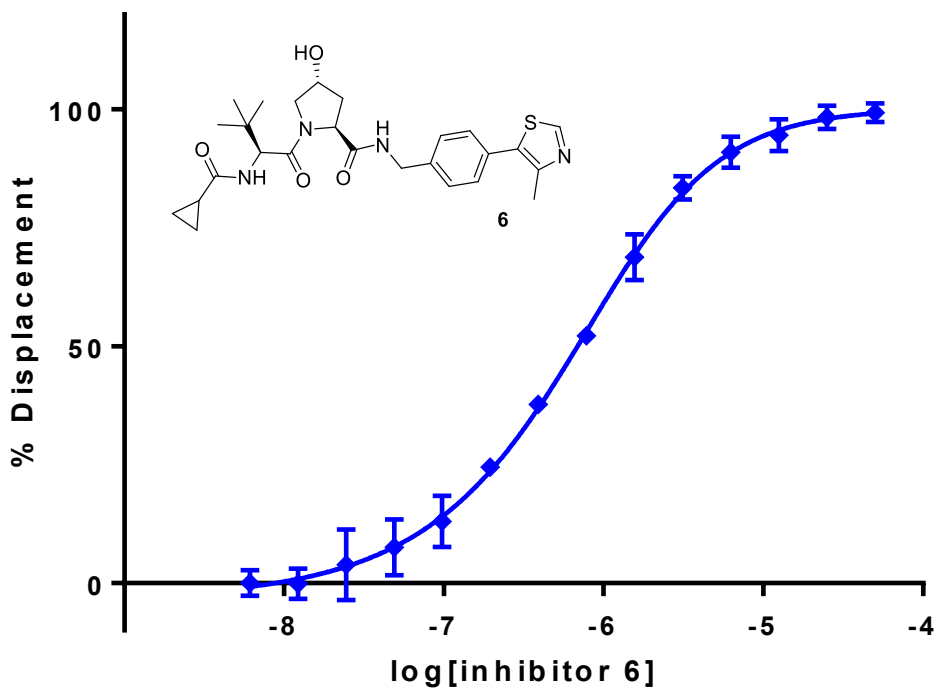

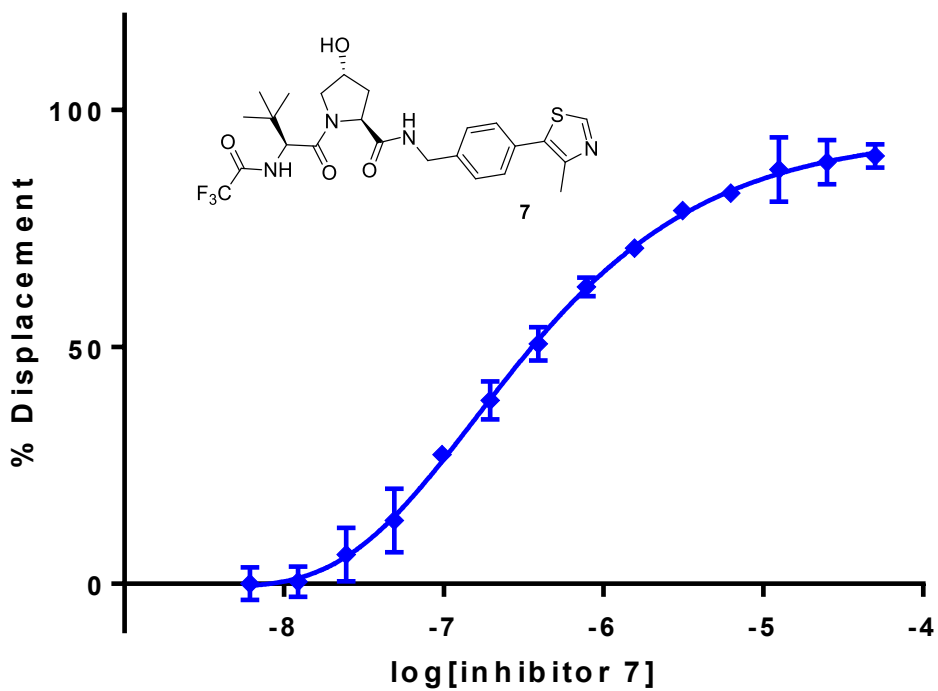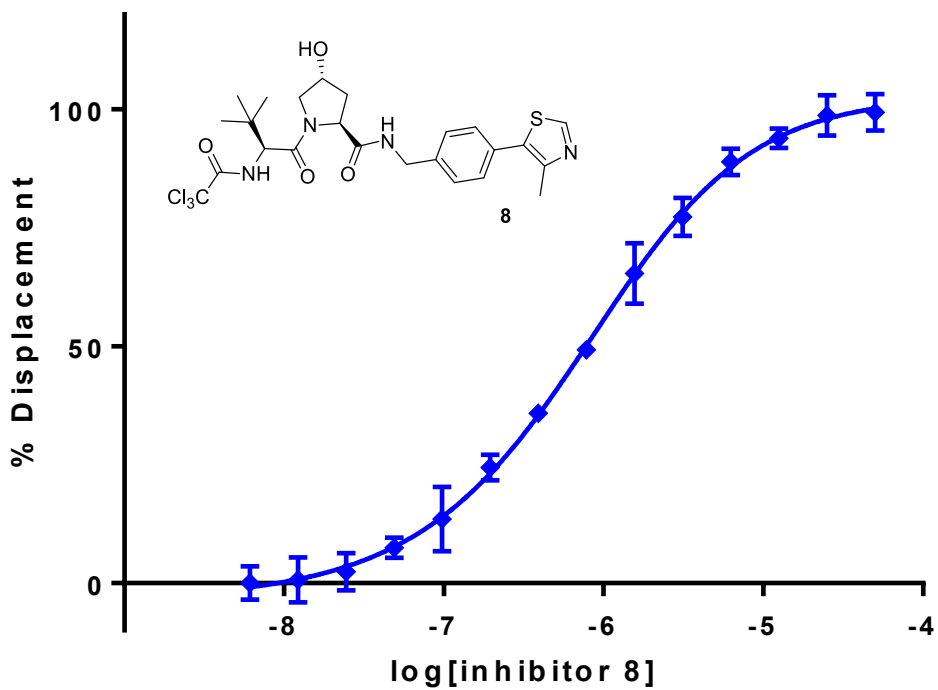

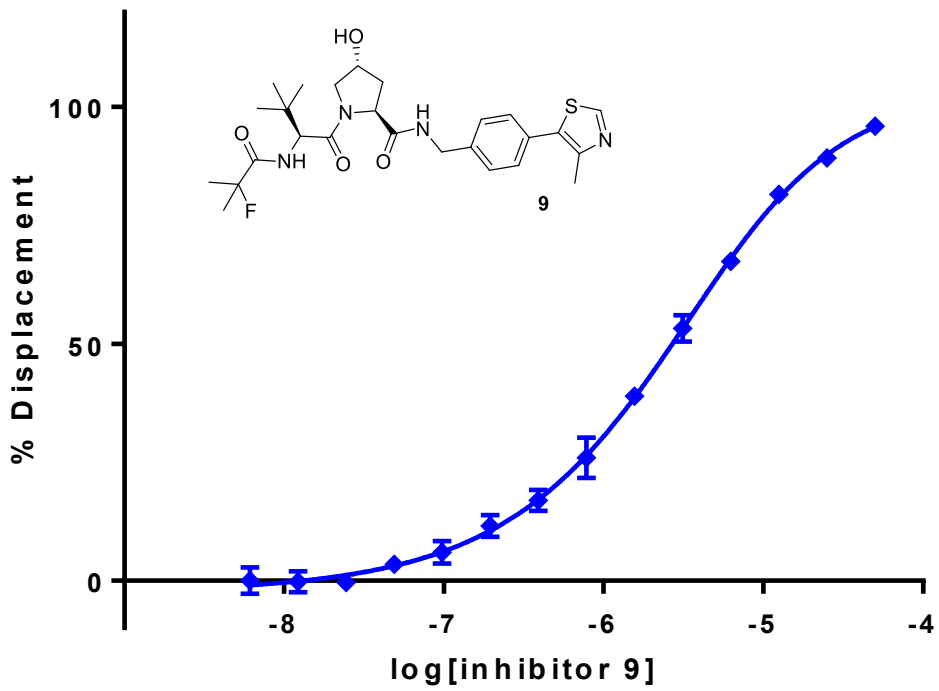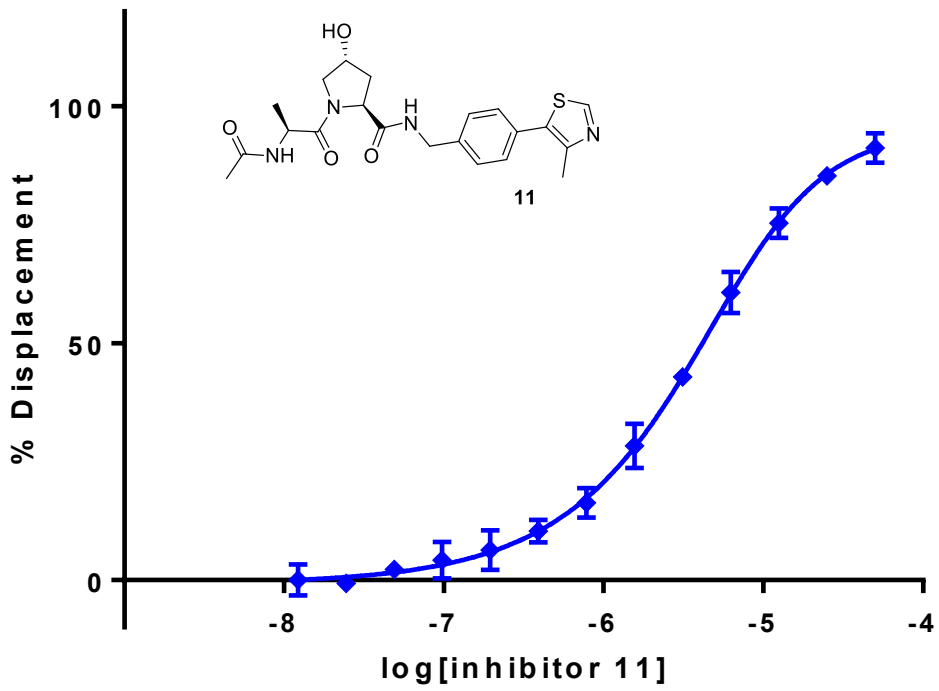

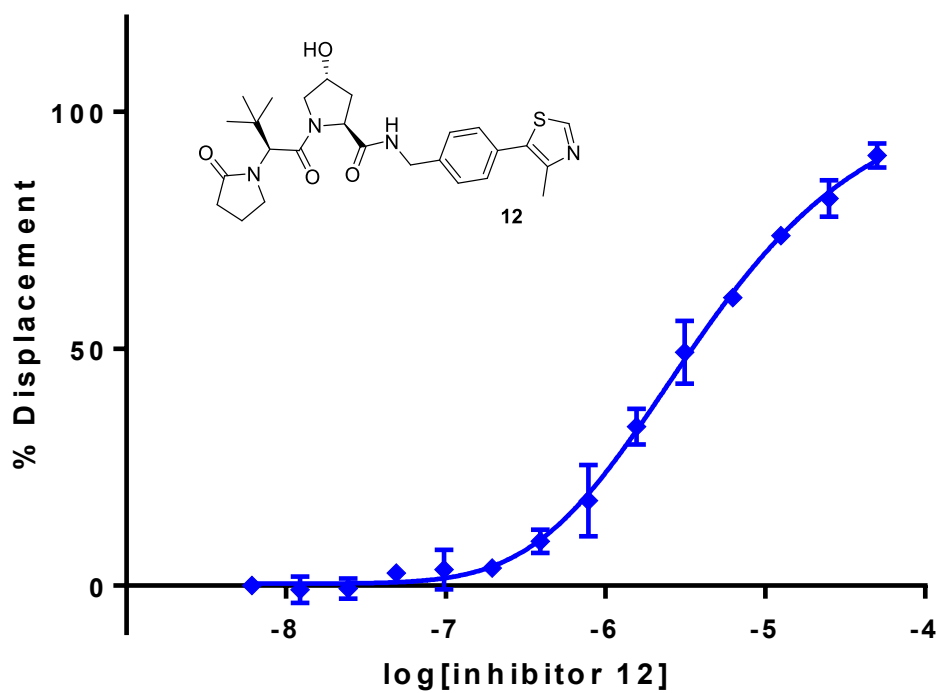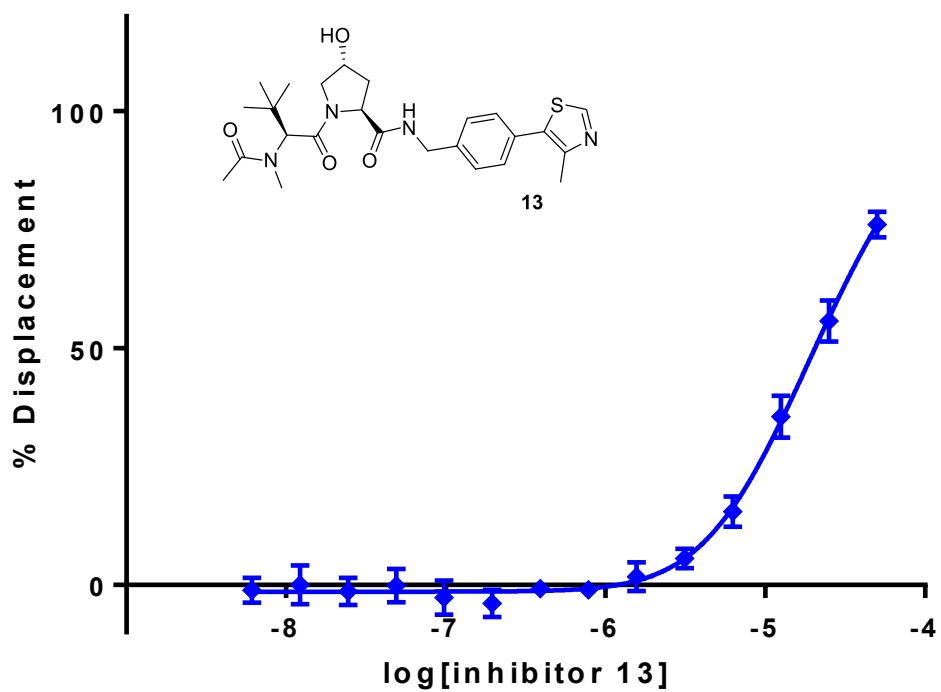



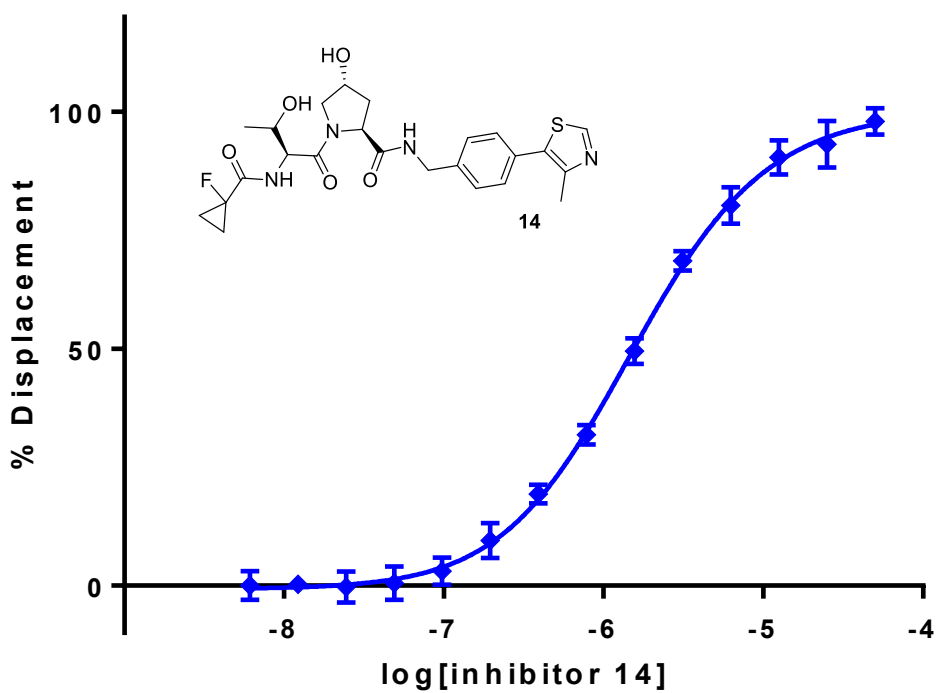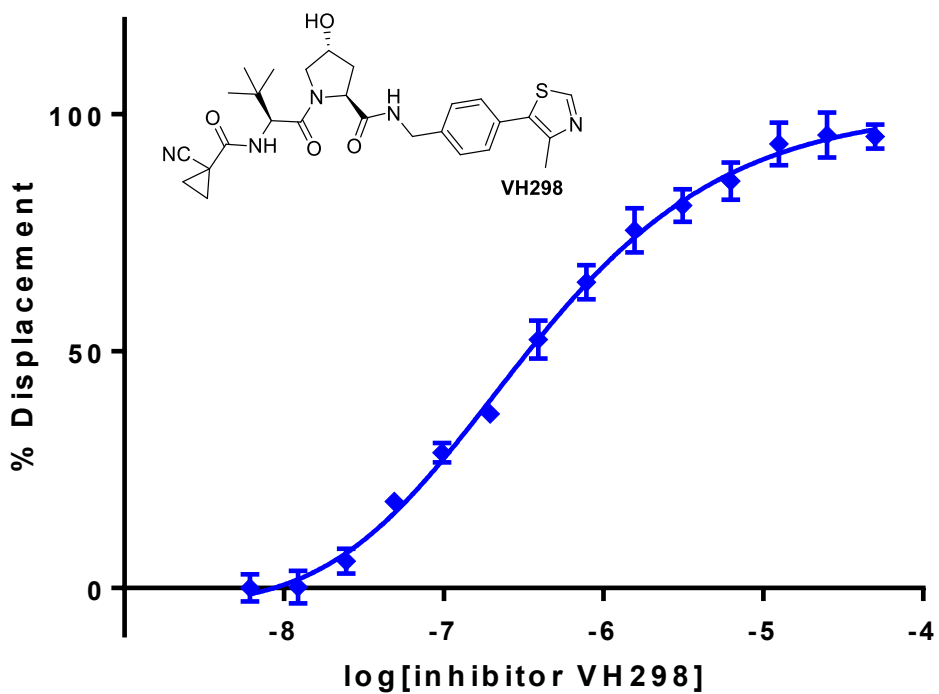

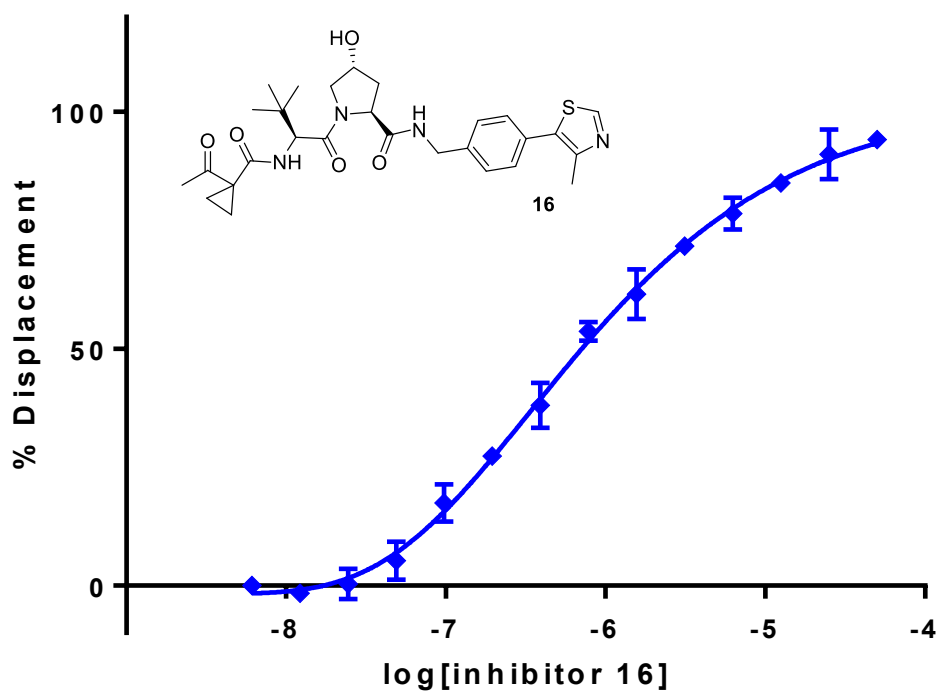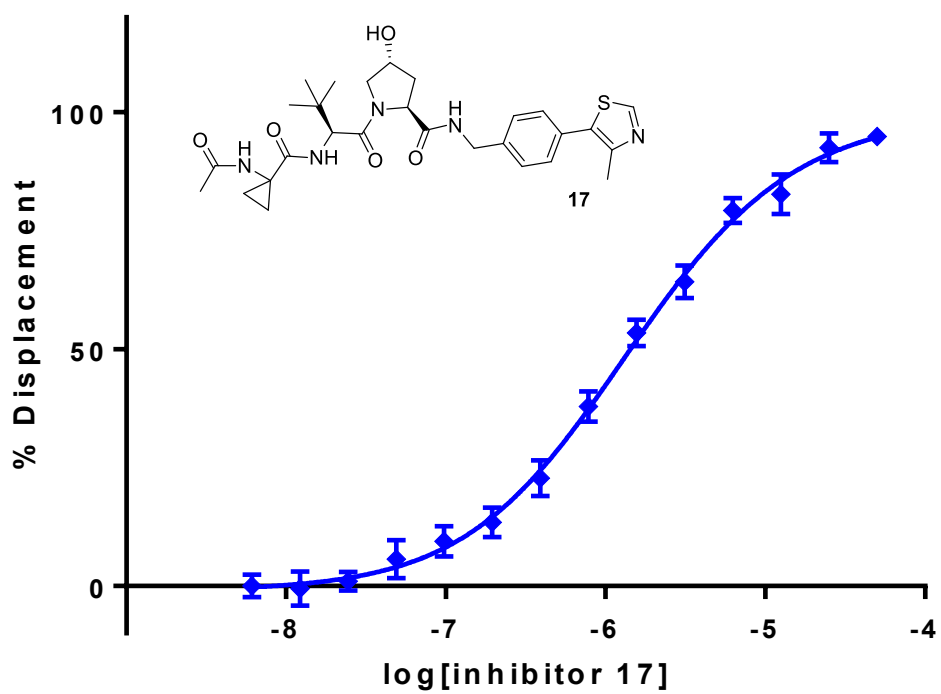

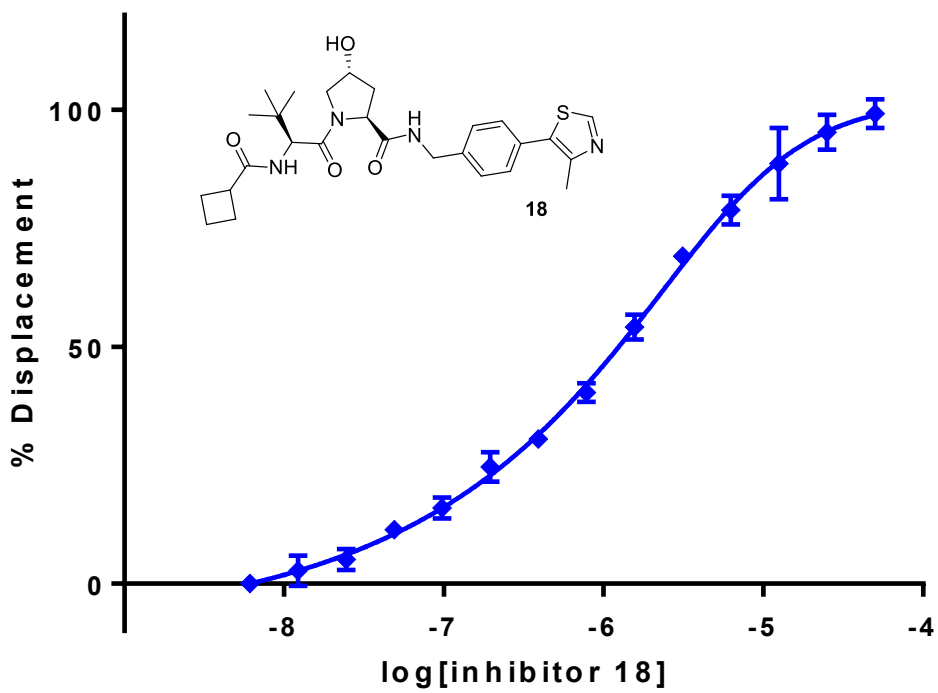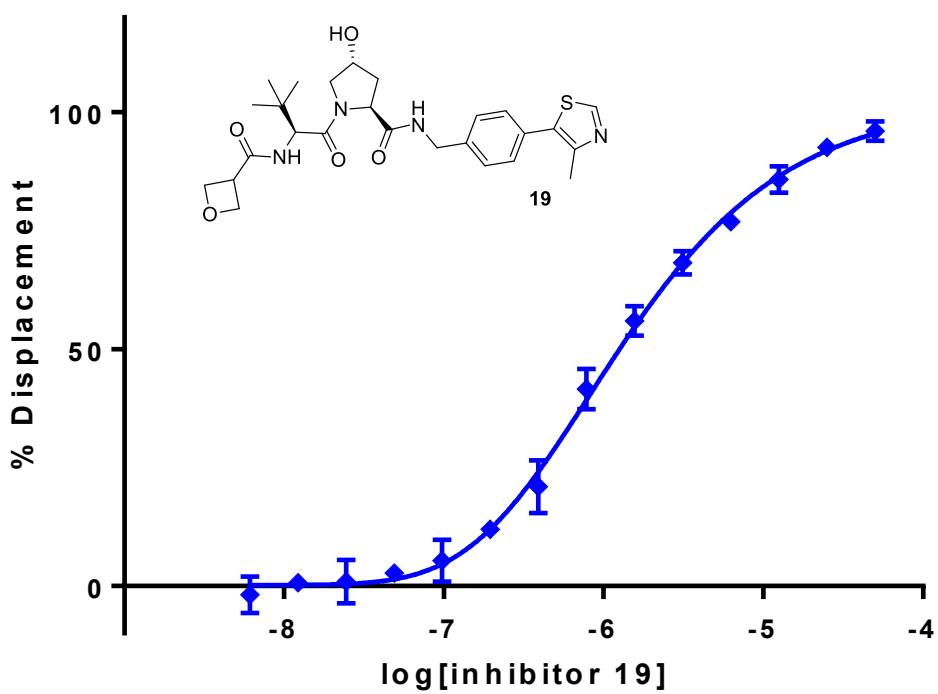

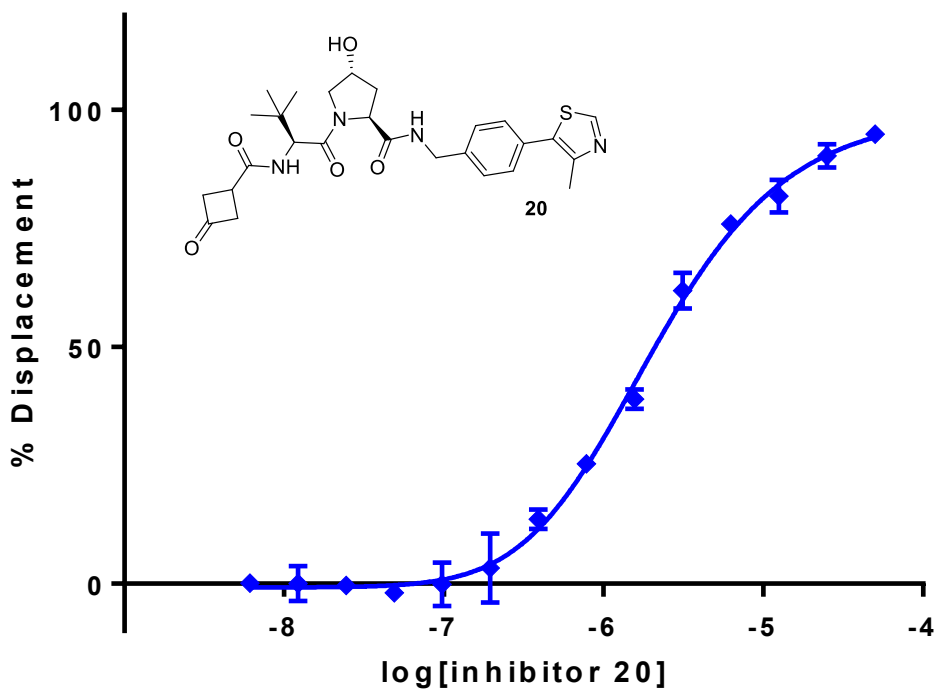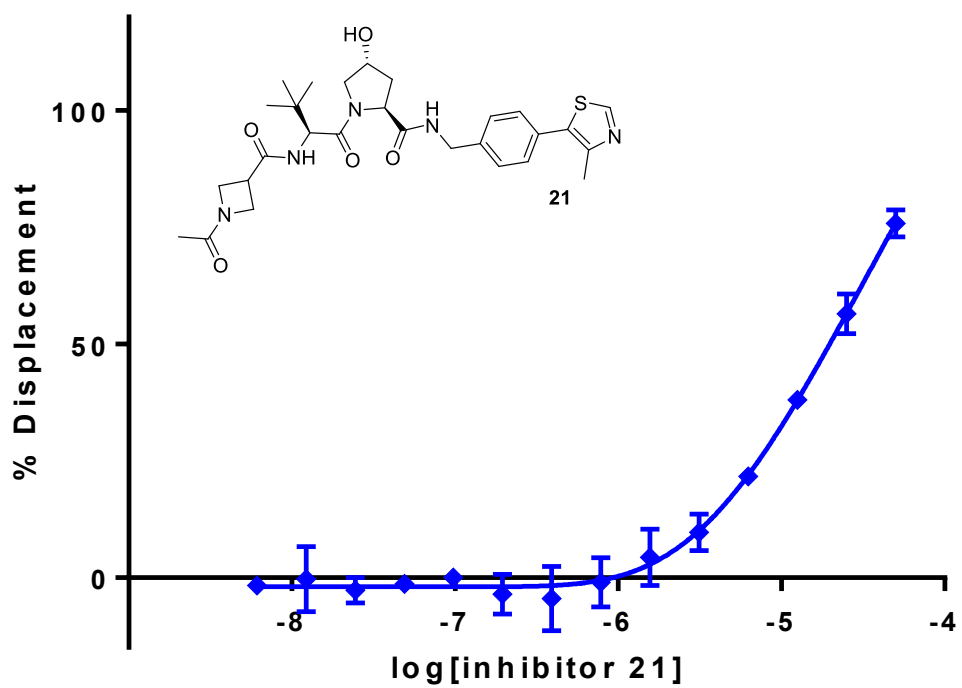

## ITC Titrations

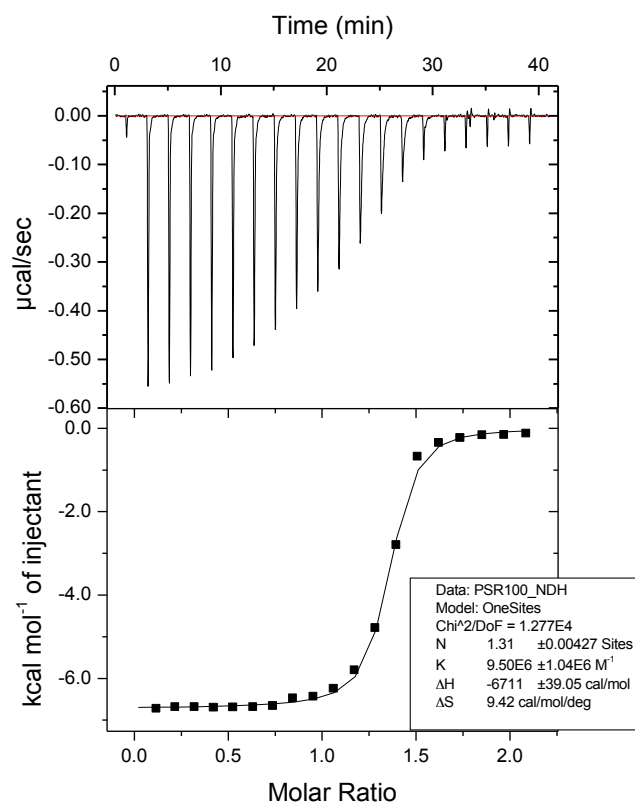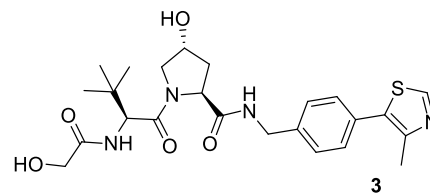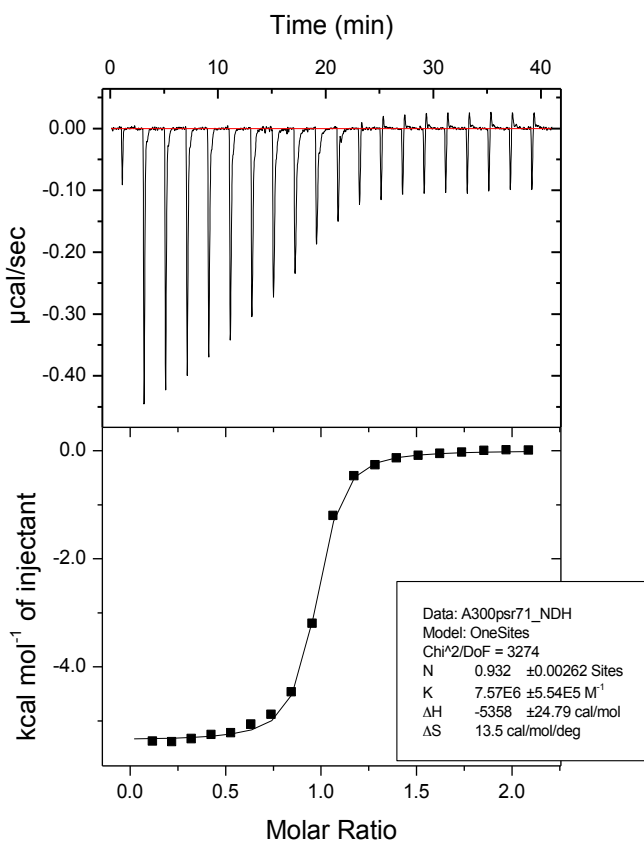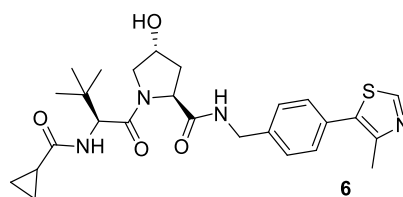

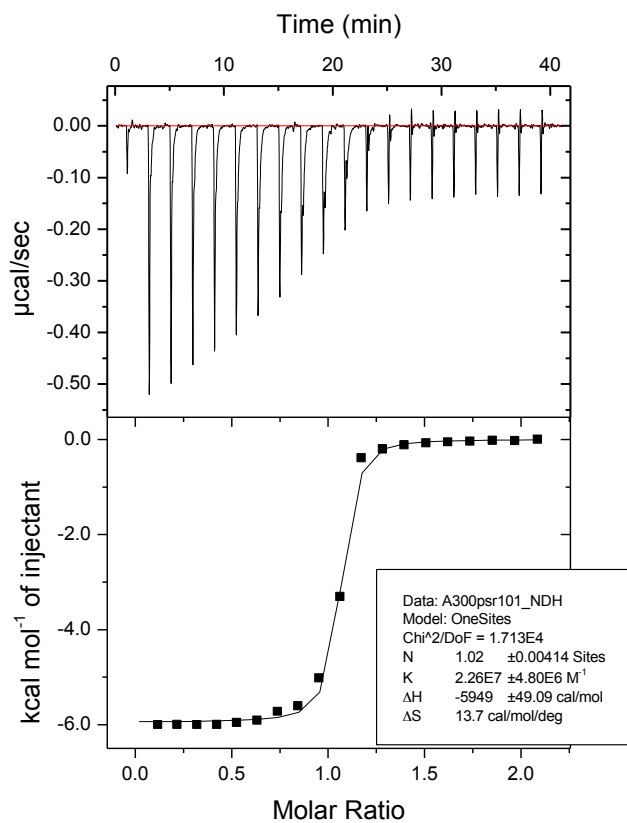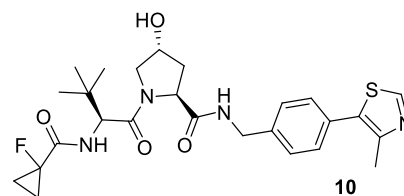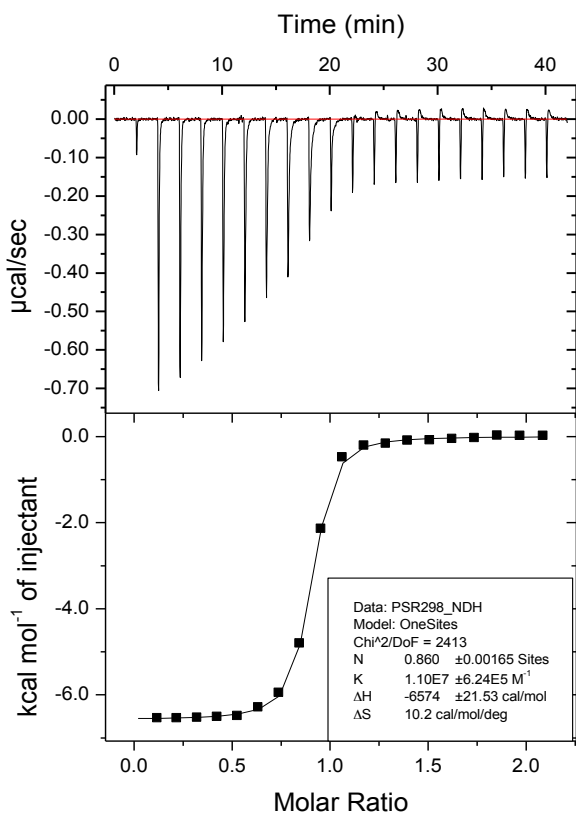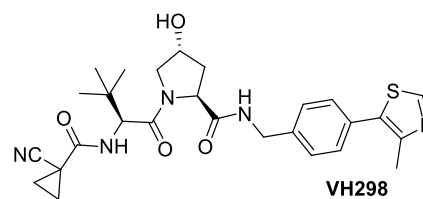



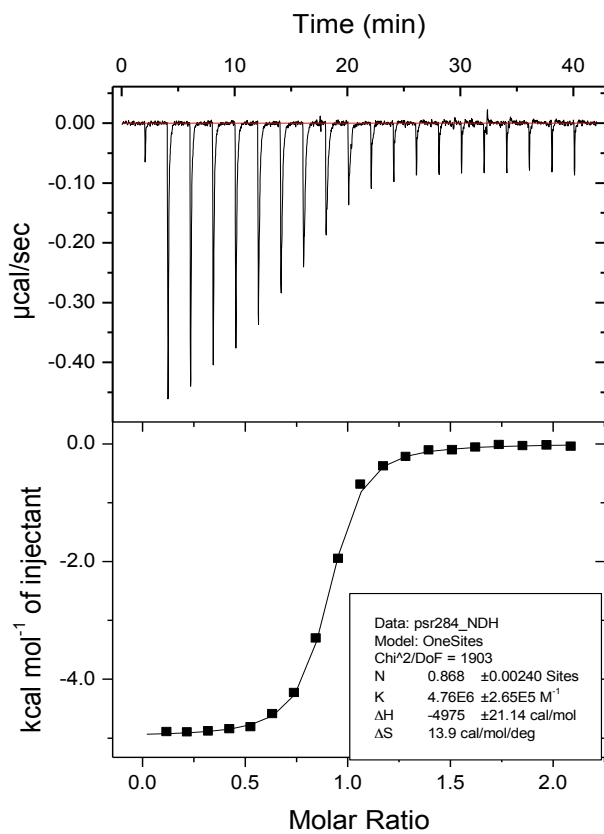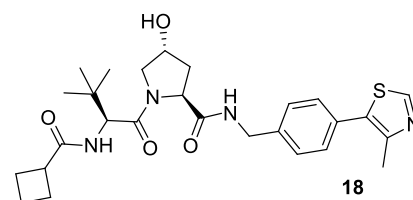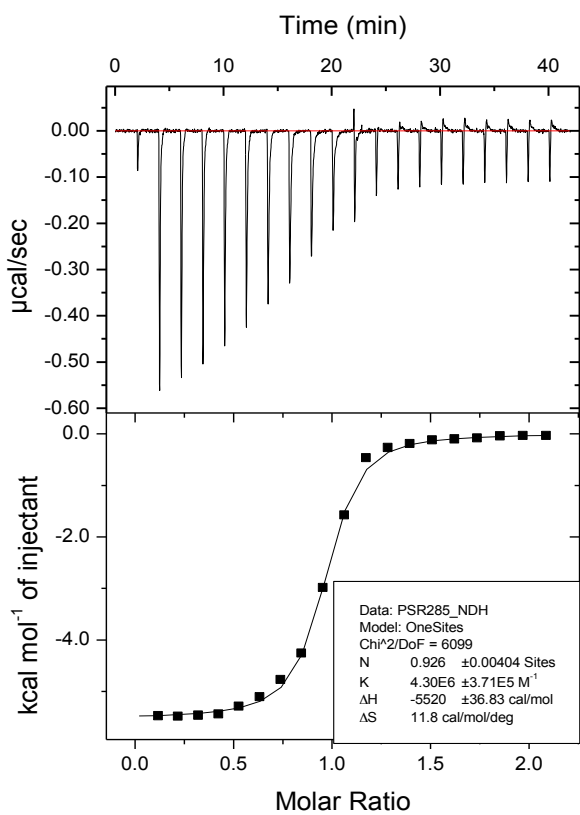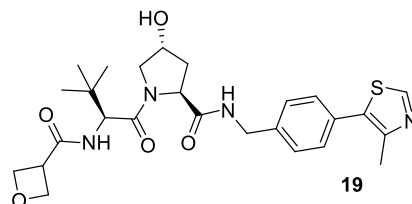



## SPR Sensograms

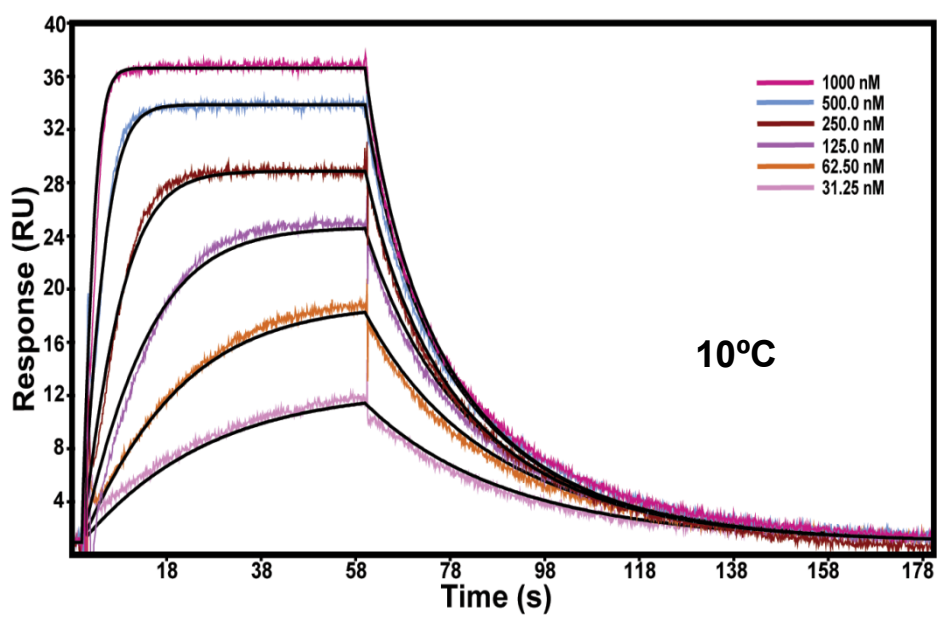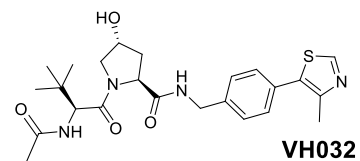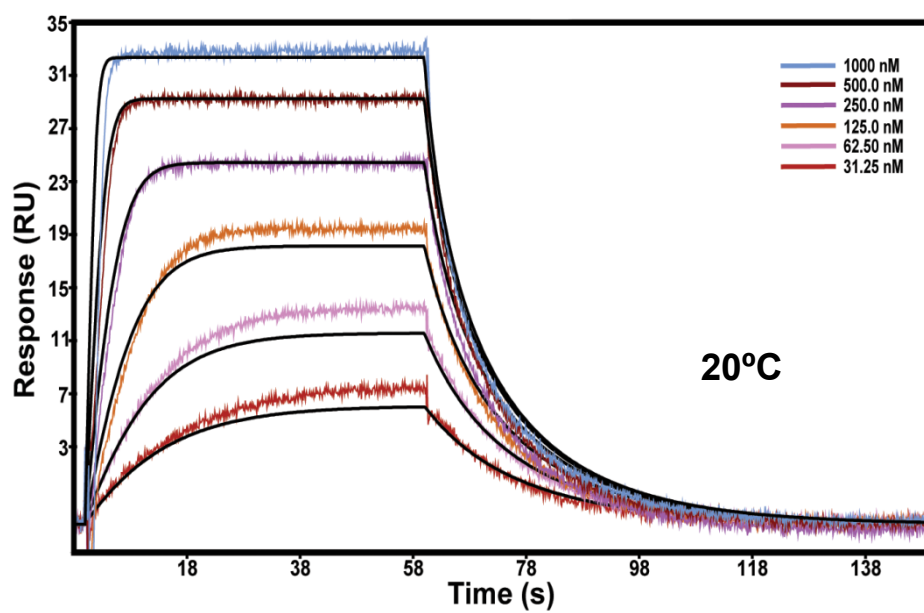

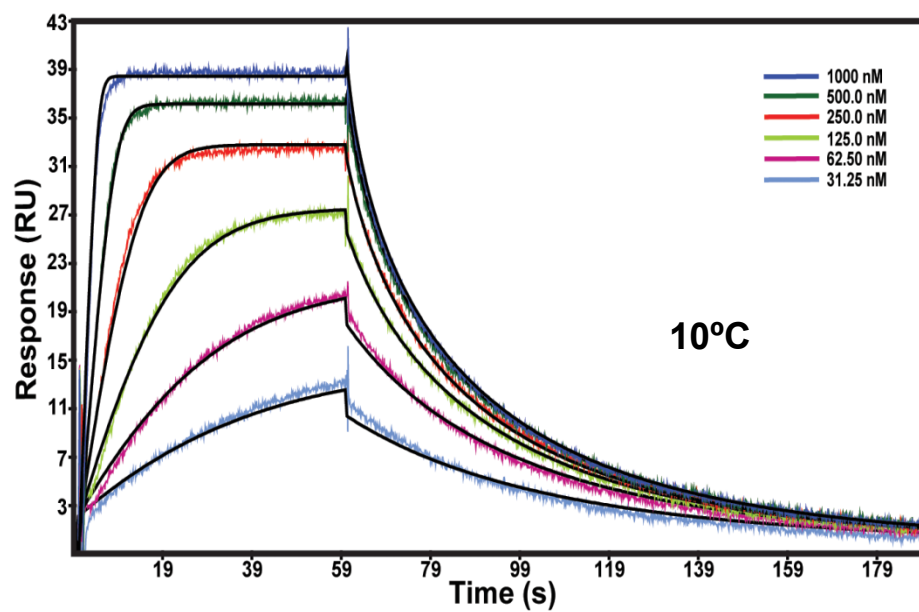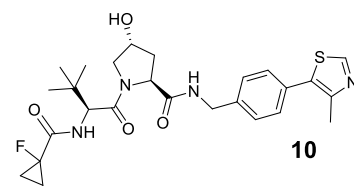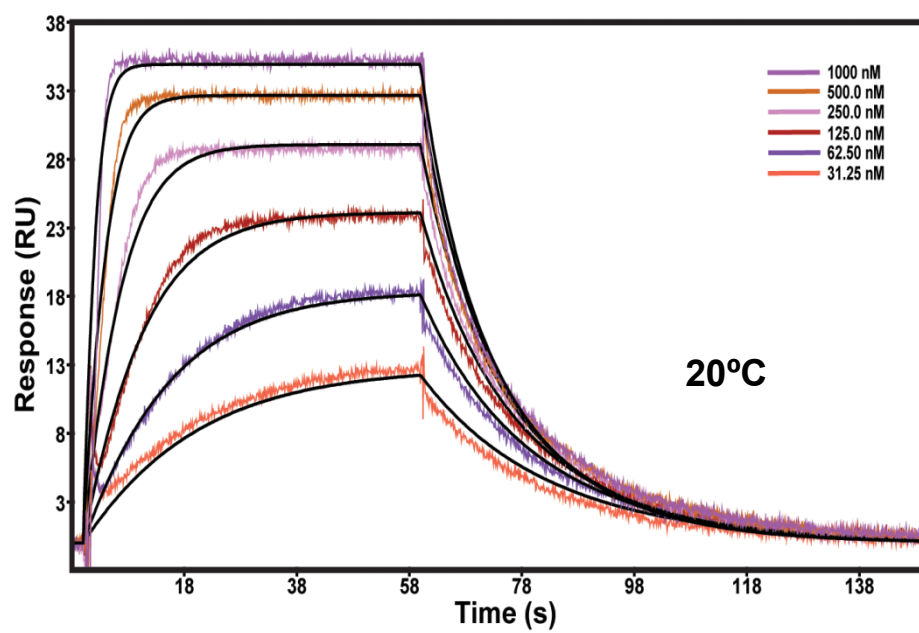

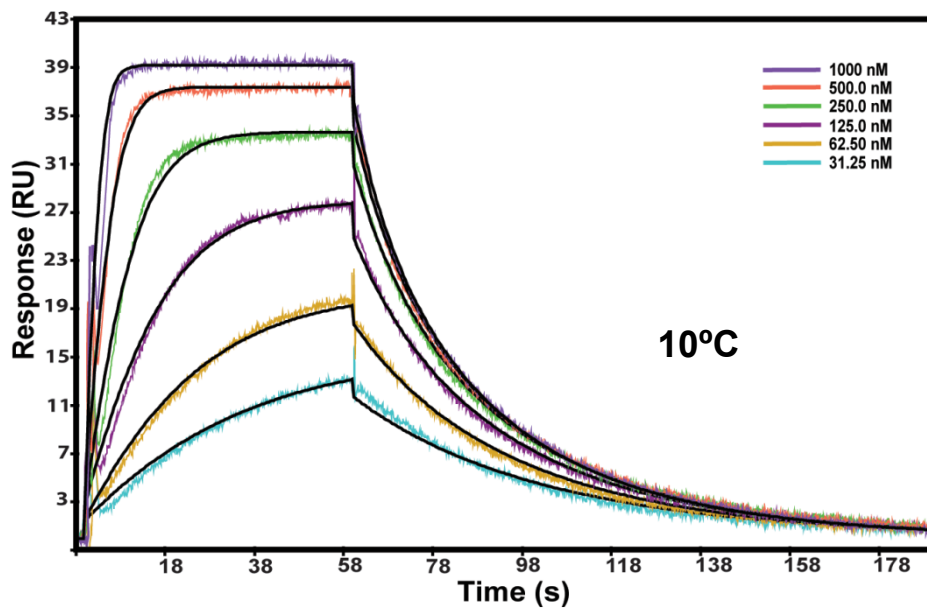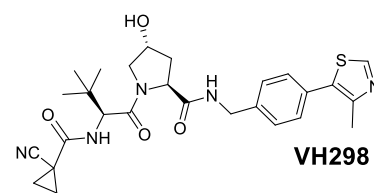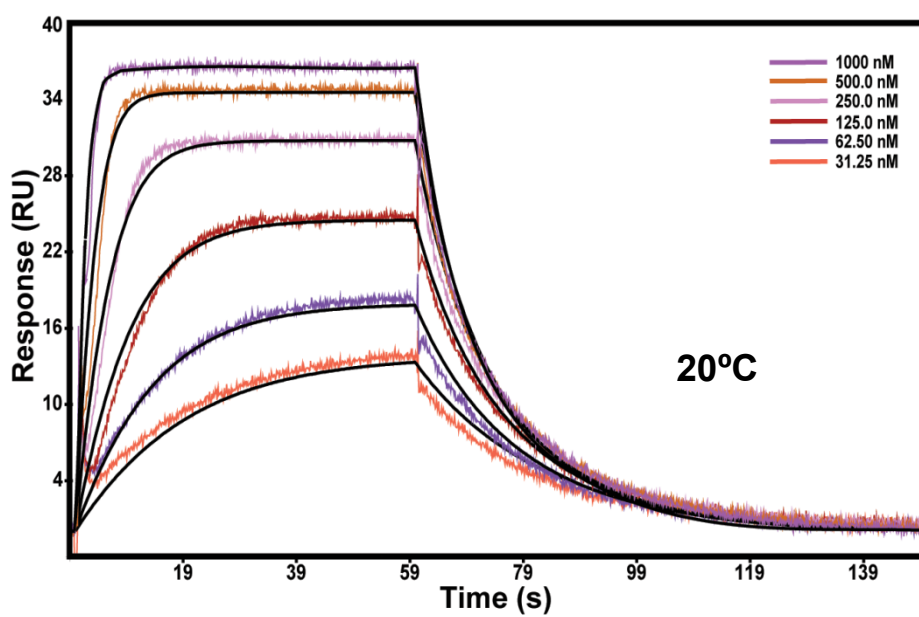

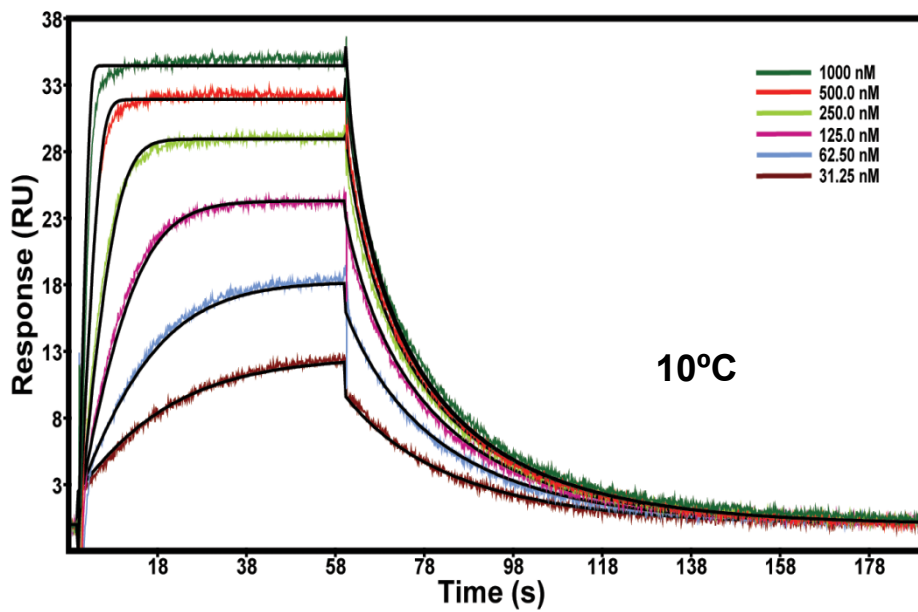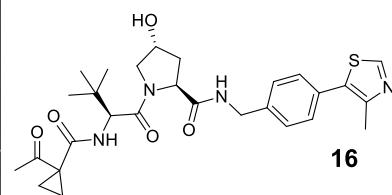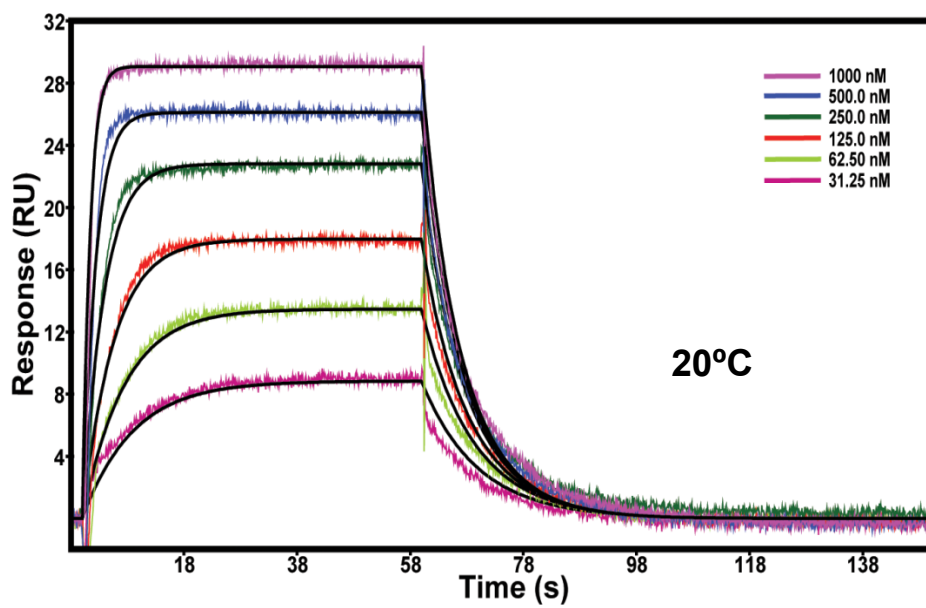

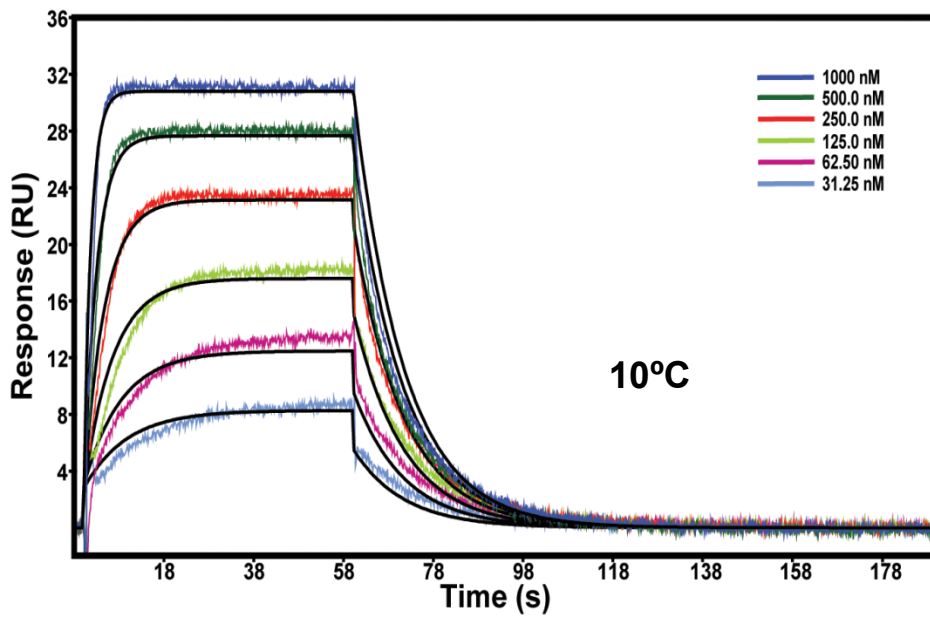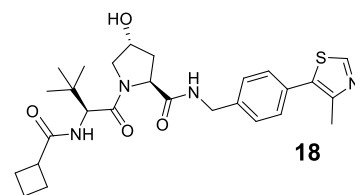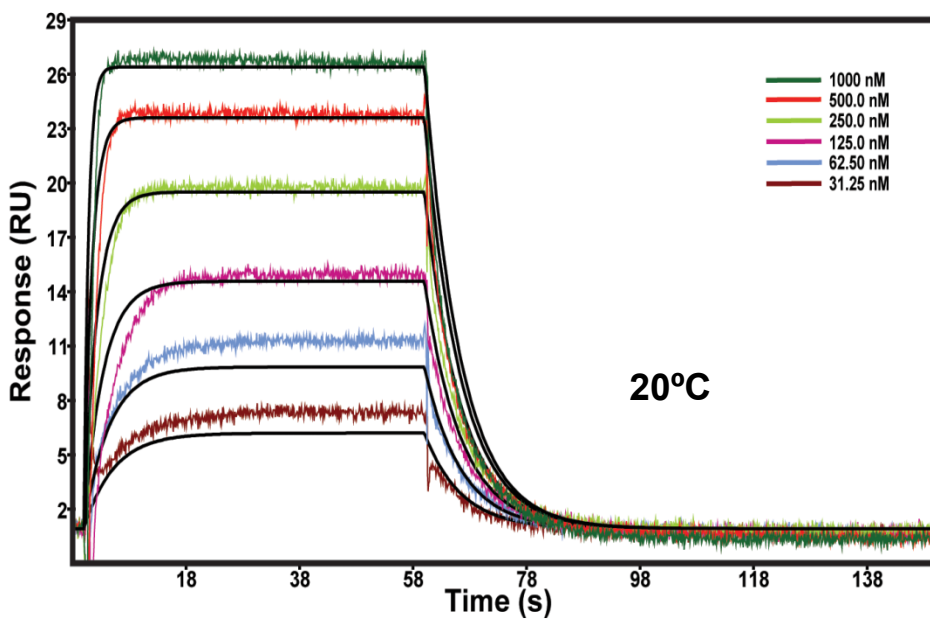

## X-ray Crystallography

### Supplementary Table 1

Evaluation of intracellular accumulation of VHL inhibitors **VH032**, **10**, **VH298**, **16** and **18** on HeLa cells after 2 h treatment with compounds.

| Inhibitor    | Compound associated with cells ( $\mu\text{M}$ ) | Fraction unbound (fu) | Final free compound concentration in cells ( $\mu\text{M}$ ) |
|--------------|--------------------------------------------------|-----------------------|--------------------------------------------------------------|
| <b>VH032</b> | 463.8                                            | 0.0016                | 0.742                                                        |
| <b>10</b>    | 383.6                                            | 0.0002                | 0.071                                                        |
| <b>VH298</b> | 150.0                                            | 0.0007                | 0.058                                                        |
| <b>16</b>    | 100.0                                            | 0.0008                | 0.046                                                        |
| <b>18</b>    | 204.0                                            | 0.0008                | 0.093                                                        |

Propranolol compound with high concentration associated with cells (2679.0  $\mu\text{M}$ ) and Metoprolol compound with high fraction unbound (0.0050) were used as controls for the experiment.

**Supplementary Table 2.**

Crystallographic data processing and refinement statistics.

Values in parentheses are for the highest resolution shell.

| Dataset                                   | Inhibitor 3              | Inhibitor 6              | Inhibitor 10             | Inhibitor 11              |
|-------------------------------------------|--------------------------|--------------------------|--------------------------|---------------------------|
| <b>Synchrotron</b>                        | Diamond                  | Diamond                  | Diamond                  | Diamond                   |
| Wavelength (Å)                            | 0.9174                   | 0.9174                   | 0.9174                   | 0.9282                    |
| <b>Processing statistics</b>              |                          |                          |                          |                           |
| Space group                               | <i>P4<sub>1</sub>22</i>  | <i>P4<sub>1</sub>22</i>  | <i>P4<sub>1</sub>22</i>  | <i>P4<sub>1</sub>22</i>   |
| Unit cell parameters                      |                          |                          |                          |                           |
| <i>a, b</i> (Å)                           | 93.3                     | 93.2                     | 93.4                     | 93.1                      |
| <i>c</i> (Å)                              | 365.0                    | 365.1                    | 365.2                    | 363.0                     |
| Resolution limits (Å)                     | 48.9–2.10<br>(2.14–2.10) | 48.9–2.20<br>(2.24–2.20) | 49.0–2.20<br>(2.24–2.20) | 48.8–2.90<br>(3.03–2.90)  |
| Total reflections                         | 849102 (41946)           | 556127 (31559)           | 540233 (25019)           | 311841 (39080)            |
| Unique reflections                        | 95188 (4654)             | 82957 (4452)             | 83072 (4446)             | 36661 (4375)              |
| Completeness (%)                          | 99.8 (99.9)              | 99.8 (100)               | 99.6 (99.0)              | 100 (100)                 |
| Multiplicity                              | 8.9 (9.0)                | 6.7 (7.1)                | 6.5 (5.6)                | 8.5 (8.9)                 |
| <i>R</i> <sub>merge</sub> (%)             | 14.2 (98.0)              | 14.1 (85.7)              | 10.4 (72.2)              | 21.2 (89)                 |
| <i>I</i> / $\sigma$ ( <i>I</i> )          | 9.4 (2.1)                | 8.6 (2.2)                | 10.8 (2.0)               | 7.3 (2.2)                 |
| CC <sub>1/2</sub> (%)                     | 99.8 (84.1)              | 99.7 (83.7)              | 99.9 (73.8)              | 99.0 (85.2)               |
| Wilson <i>B</i> factor (Å <sup>2</sup> )  | 23.5                     | 23.2                     | 27.5                     | 26.2                      |
| Mosaicity (°)                             | 0.05                     | 0.05                     | 0.13                     | 0.26                      |
| <b>Refinement statistics</b>              |                          |                          |                          |                           |
| Resolution limits (Å)                     | 93.3–2.10<br>(2.15–2.10) | 93.2–2.20<br>(2.26–2.20) | 93.4–2.20<br>(2.26–2.20) | 93.08–2.90<br>(2.97–2.90) |
| <i>R</i> <sub>work</sub> (%)              | 20.3 (25.1)              | 20.1 (24.9)              | 19.7 (27.7)              | 20.2 (28.5)               |
| <i>R</i> <sub>free</sub> (%)              | 24.5 (30.2)              | 24.9 (30.8)              | 24.5 (32.9)              | 26.8 (32.5)               |
| No. reflections                           | 90242 (6564)             | 78650 (5687)             | 78759 (5677)             | 34701 (1893)              |
| No. test reflections                      | 4830 (370)               | 4192 (307)               | 4203 (309)               | 2505 (137)                |
| Model atoms                               | 11635                    | 11675                    | 11642                    | 11274                     |
| Protein <i>B</i> factor (Å <sup>2</sup> ) | 37.2                     | 37.4                     | 40.3                     | 62.3                      |
| Ligand <i>B</i> factor (Å <sup>2</sup> )  | 26.9                     | 24.6                     | 27.9                     | 41.2                      |
| r.m.s.d. bonds (Å)                        | 0.007                    | 0.008                    | 0.008                    | 0.007                     |
| r.m.s.d. angles (°)                       | 1.27                     | 1.29                     | 1.28                     | 1.25                      |
| <b>Ramachandran plot</b>                  |                          |                          |                          |                           |
| Favoured (%)                              | 97.6                     | 97.4                     | 97.4                     | 96.0                      |
| Allowed (%)                               | 2.3                      | 2.5                      | 2.5                      | 3.2                       |
| Disallowed (%)                            | 0.1                      | 0.1                      | 0.1                      | 0.8                       |
| <b>PDB code</b>                           | 5NVV                     | 5NVW                     | 5NVX                     | 5NVY                      |

Values in parentheses are for the highest resolution shell.

| Dataset                                   | Inhibitor 16             | Inhibitor 17             | Inhibitor 18             | Inhibitor 19             |
|-------------------------------------------|--------------------------|--------------------------|--------------------------|--------------------------|
| <b>Synchrotron</b>                        | Diamond                  | Diamond                  | Diamond                  | Diamond                  |
| Wavelength (Å)                            | 0.9282                   | 0.9282                   | 0.9282                   | 0.9795                   |
| <b>Processing statistics</b>              |                          |                          |                          |                          |
| Space group                               | <i>P4<sub>1</sub>22</i>  | <i>P4<sub>1</sub>22</i>  | <i>P4<sub>1</sub>22</i>  | <i>P4<sub>1</sub>22</i>  |
| Unit cell parameters                      |                          |                          |                          |                          |
| <i>a, b</i> (Å)                           | 94.8                     | 94.8                     | 94.6                     | 94.6                     |
| <i>c</i> (Å)                              | 368.1                    | 368.4                    | 368.1                    | 368.6                    |
| Resolution limits (Å)                     | 49.6–2.70<br>(2.79–2.70) | 49.6–2.30<br>(2.35–2.30) | 49.5–2.10<br>(2.14–2.10) | 49.5–2.20<br>(2.24–2.20) |
| Total reflections                         | 355433 (35459)           | 580756 (35833)           | 626378 (25675)           | 772384 (41366)           |
| Unique reflections                        | 47321 (4567)             | 75814 (4421)             | 98140 (4785)             | 86260 (4448)             |
| Completeness (%)                          | 99.8 (99.9)              | 99.8 (99.9)              | 99.4 (99.9)              | 100 (100)                |
| Multiplicity                              | 7.5 (7.8)                | 7.7 (8.1)                | 6.4 (5.4)                | 9.0 (9.3)                |
| <i>R</i> <sub>merge</sub> (%)             | 13.2 (100.6)             | 8.8 (80.2)               | 6.6 (61.3)               | 12.0 (70.9)              |
| <i>I</i> / $\sigma$ ( <i>I</i> )          | 11.9 (2.2)               | 15.0 (2.8)               | 14.8 (2.5)               | 11.0 (3.1)               |
| CC <sub>1/2</sub> (%)                     | 99.9 (75.9)              | 99.9 (85.8)              | 99.9 (81.4)              | 99.8 (91.6)              |
| Wilson <i>B</i> factor (Å <sup>2</sup> )  | 36.0                     | 34.6                     | 33.2                     | 31.1                     |
| Mosaicity (°)                             | 0.18                     | 0.06                     | 0.05                     | 0.05                     |
| <b>Refinement statistics</b>              |                          |                          |                          |                          |
| Resolution limits (Å)                     | 94.8–2.70<br>(2.77–2.70) | 94.8–2.30<br>(2.36–2.30) | 94.6–2.10<br>(2.15–2.10) | 94.6–2.20<br>(2.26–2.20) |
| <i>R</i> <sub>work</sub> (%)              | 21.1 (31.4)              | 19.7 (22.9)              | 19.6 (25.4)              | 19.5 (22.6)              |
| <i>R</i> <sub>free</sub> (%)              | 27.0 (35.7)              | 23.8 (29.7)              | 23.8 (28.7)              | 24.2 (26.8)              |
| No. reflections                           | 44695 (3222)             | 71853 (5225)             | 93055 (6804)             | 81807 (5917)             |
| No. test reflections                      | 2419 (172)               | 3819 (286)               | 4964 (366)               | 4366 (321)               |
| Model atoms                               | 11069                    | 11603                    | 11697                    | 11707                    |
| Protein <i>B</i> factor (Å <sup>2</sup> ) | 52.8                     | 47.7                     | 44.5                     | 42.4                     |
| Ligand <i>B</i> factor (Å <sup>2</sup> )  | 41.3                     | 39.2                     | 33.5                     | 29.8                     |
| r.m.s.d. bonds (Å)                        | 0.007                    | 0.007                    | 0.007                    | 0.008                    |
| r.m.s.d. angles (°)                       | 1.22                     | 1.21                     | 1.25                     | 1.27                     |
| <b>Ramachandran plot</b>                  |                          |                          |                          |                          |
| Favoured (%)                              | 96.1                     | 97.6                     | 96.1                     | 96.1                     |
| Allowed (%)                               | 3.9                      | 2.3                      | 3.6                      | 3.9                      |
| Disallowed (%)                            | 0                        | 0.1                      | 0                        | 0                        |
| <b>PDB code</b>                           | 5NVZ                     | 5NWO                     | 5NW1                     | 5NW2                     |



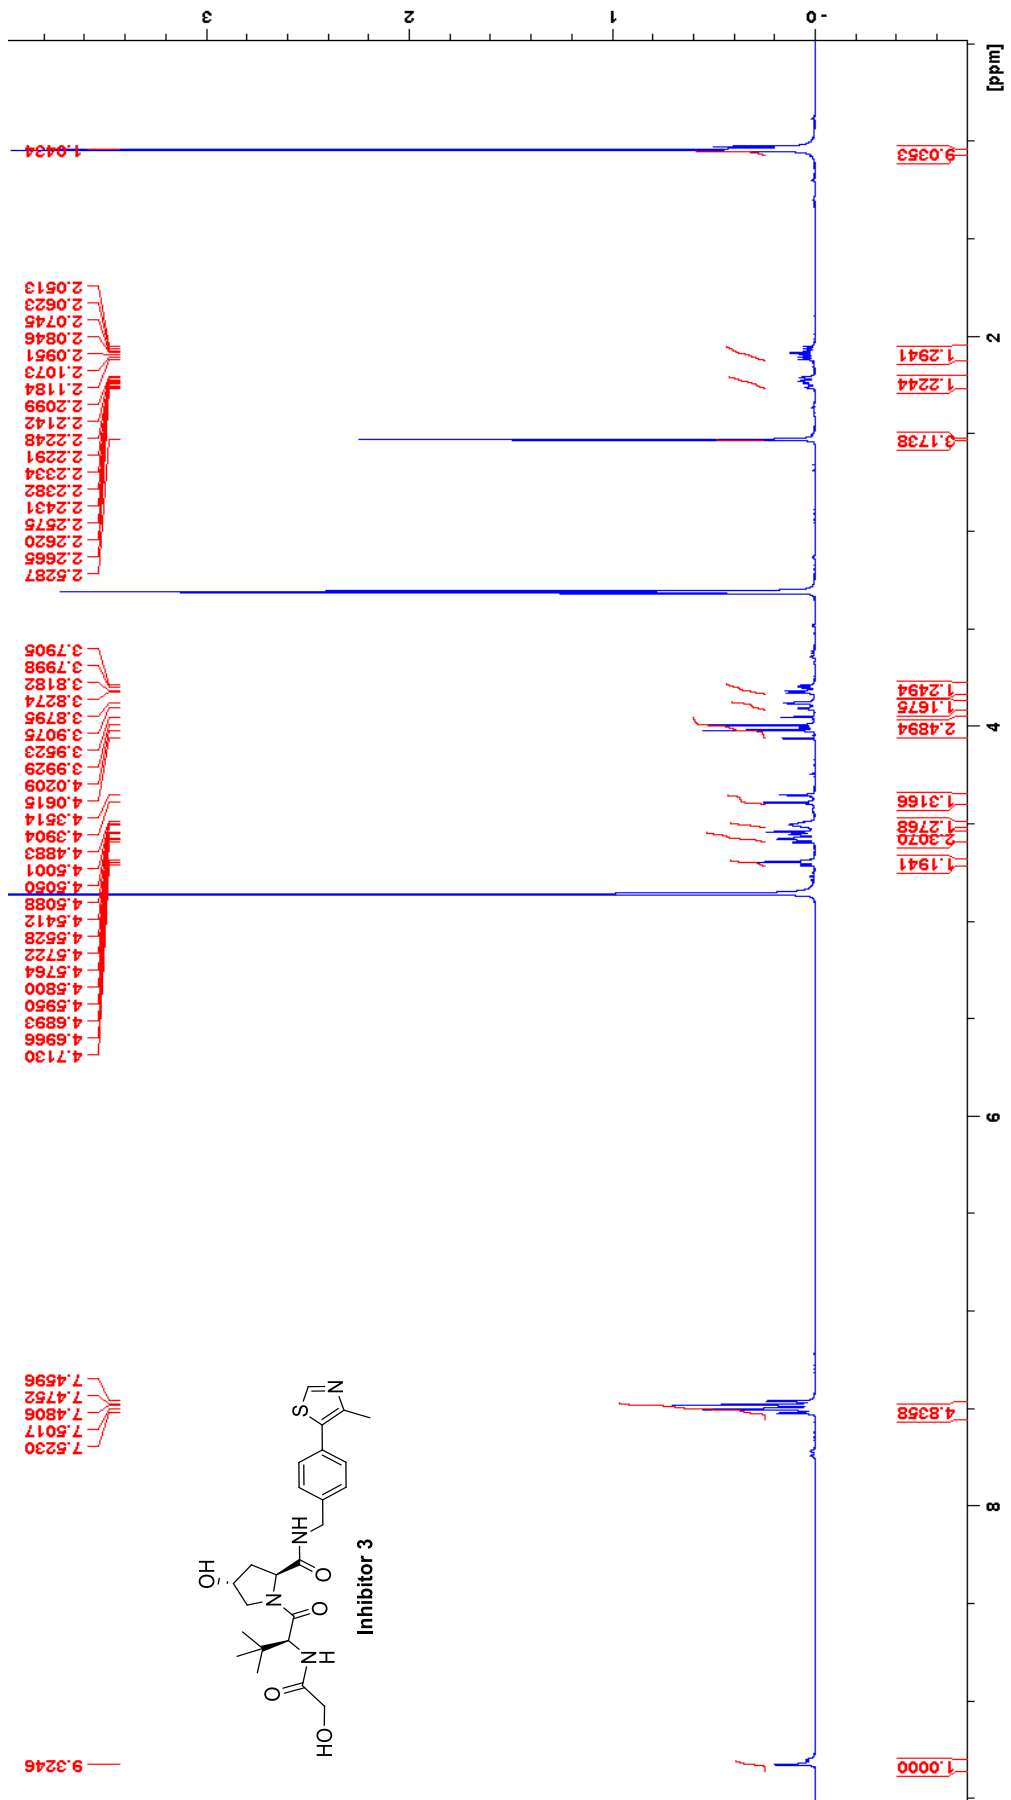

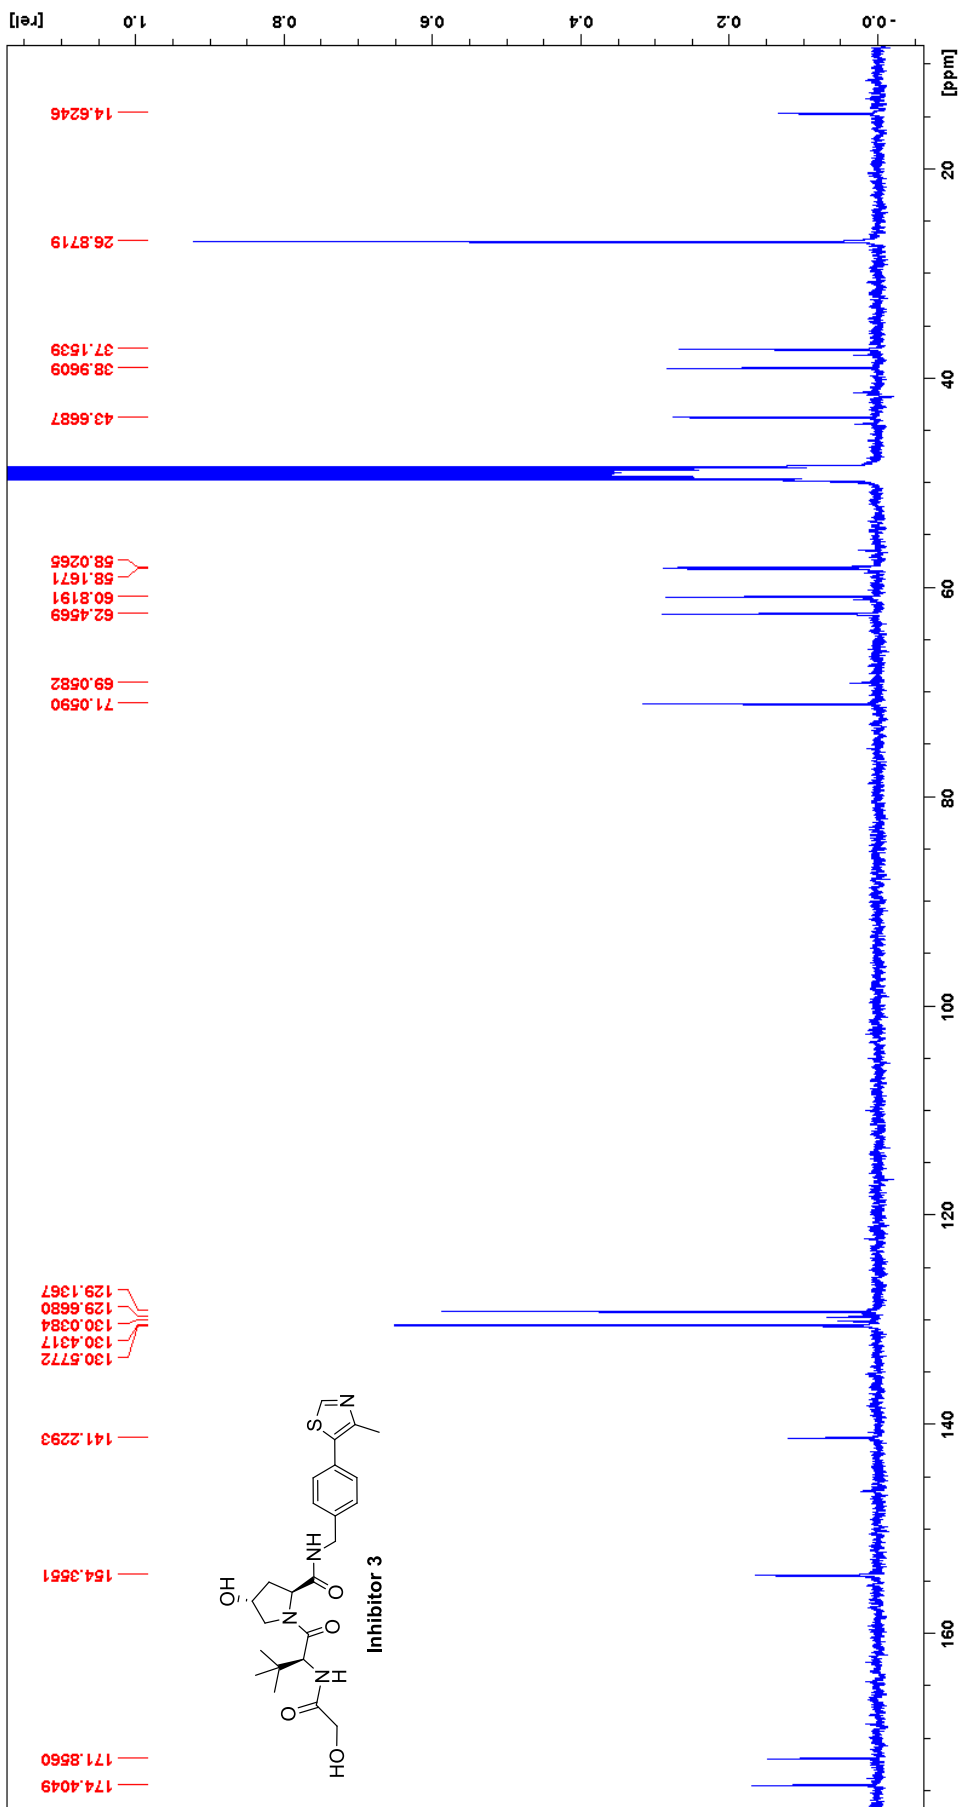



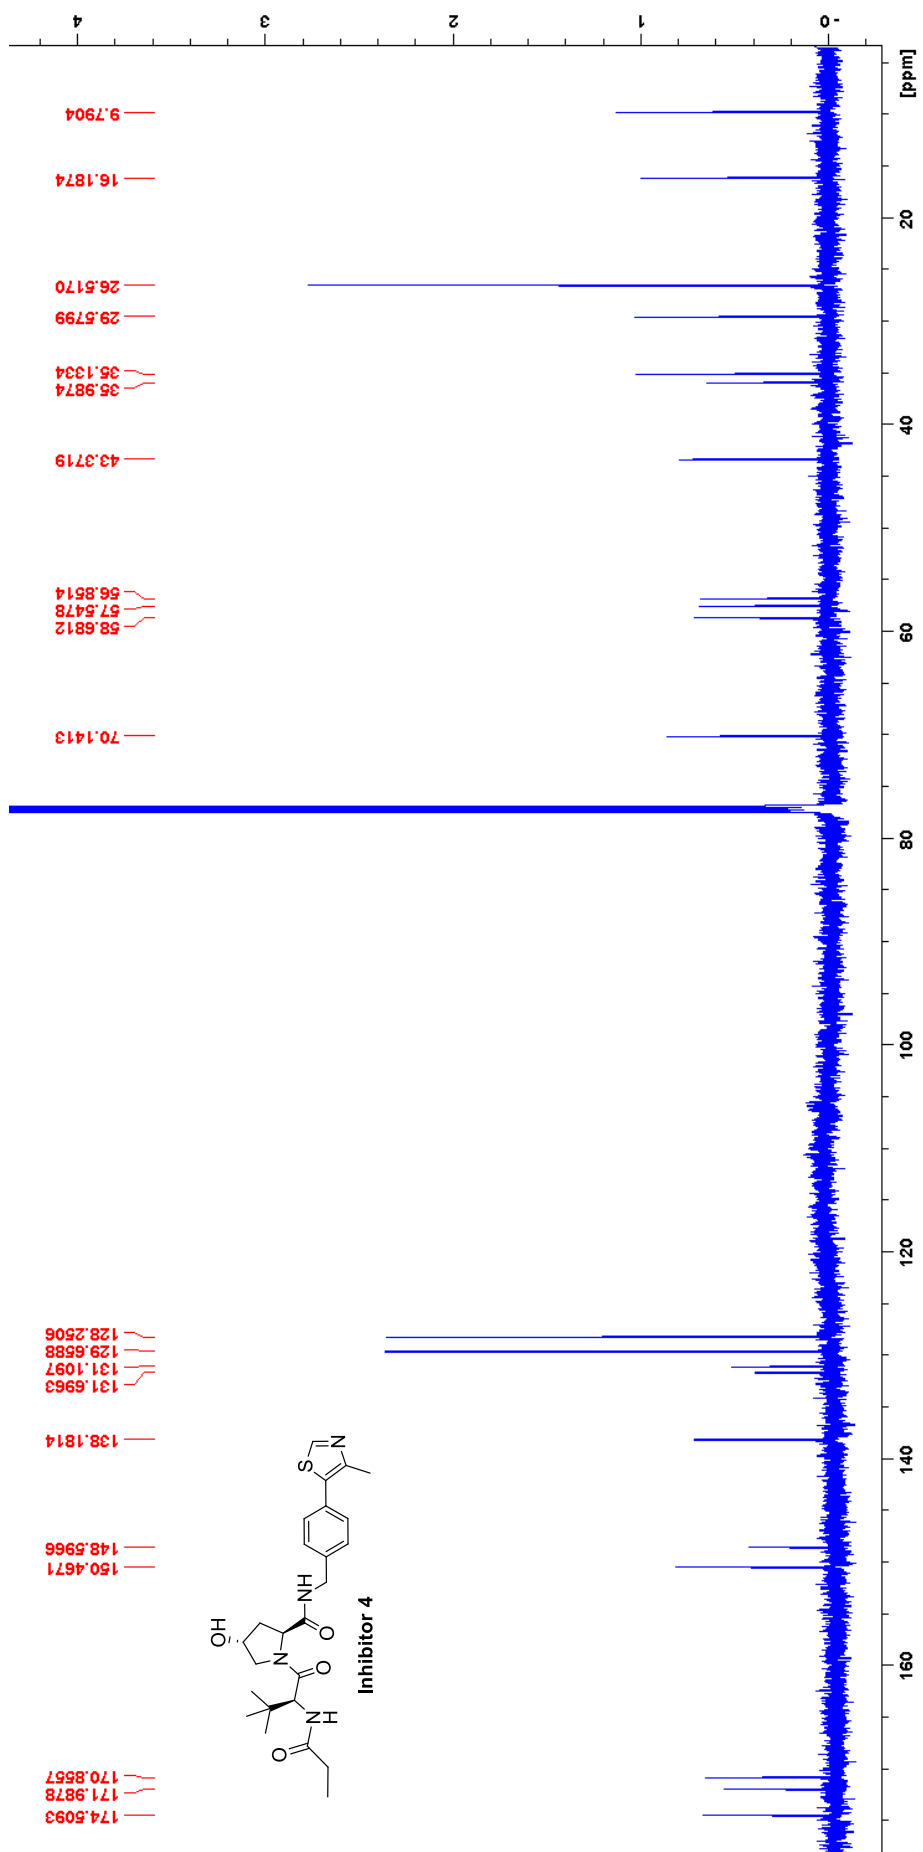

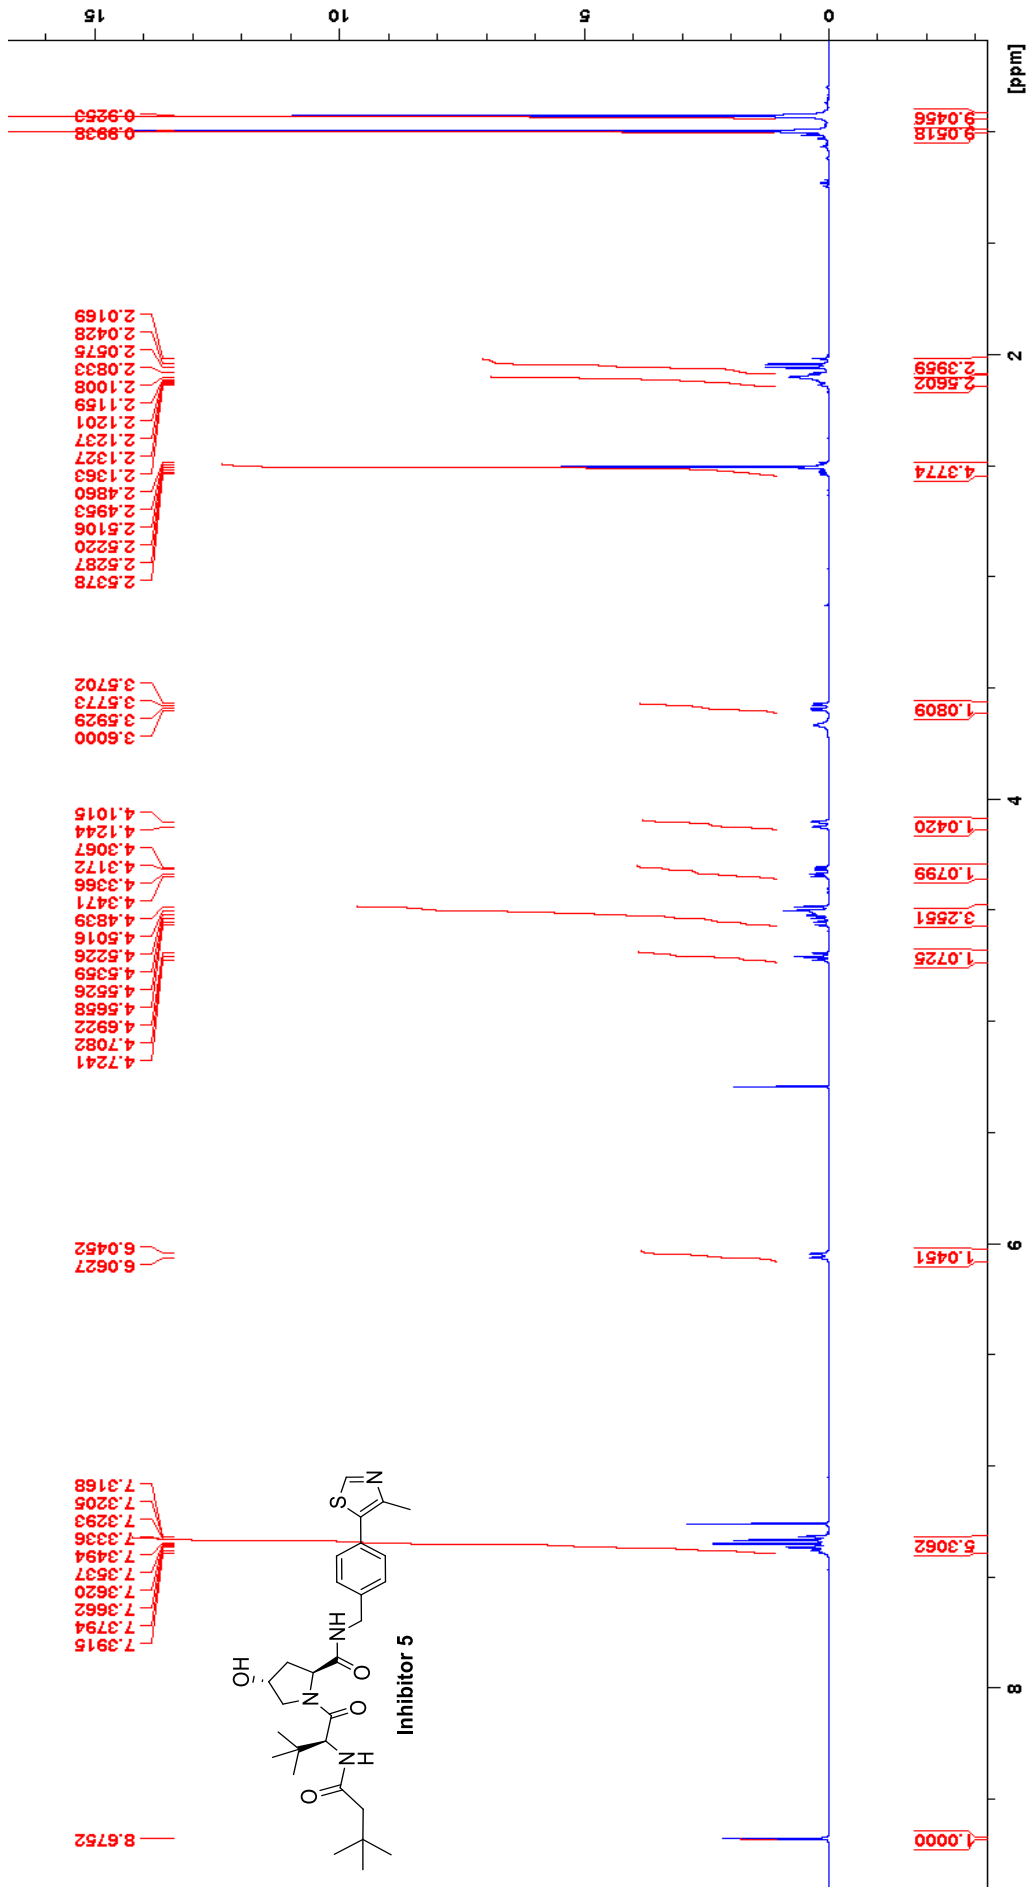

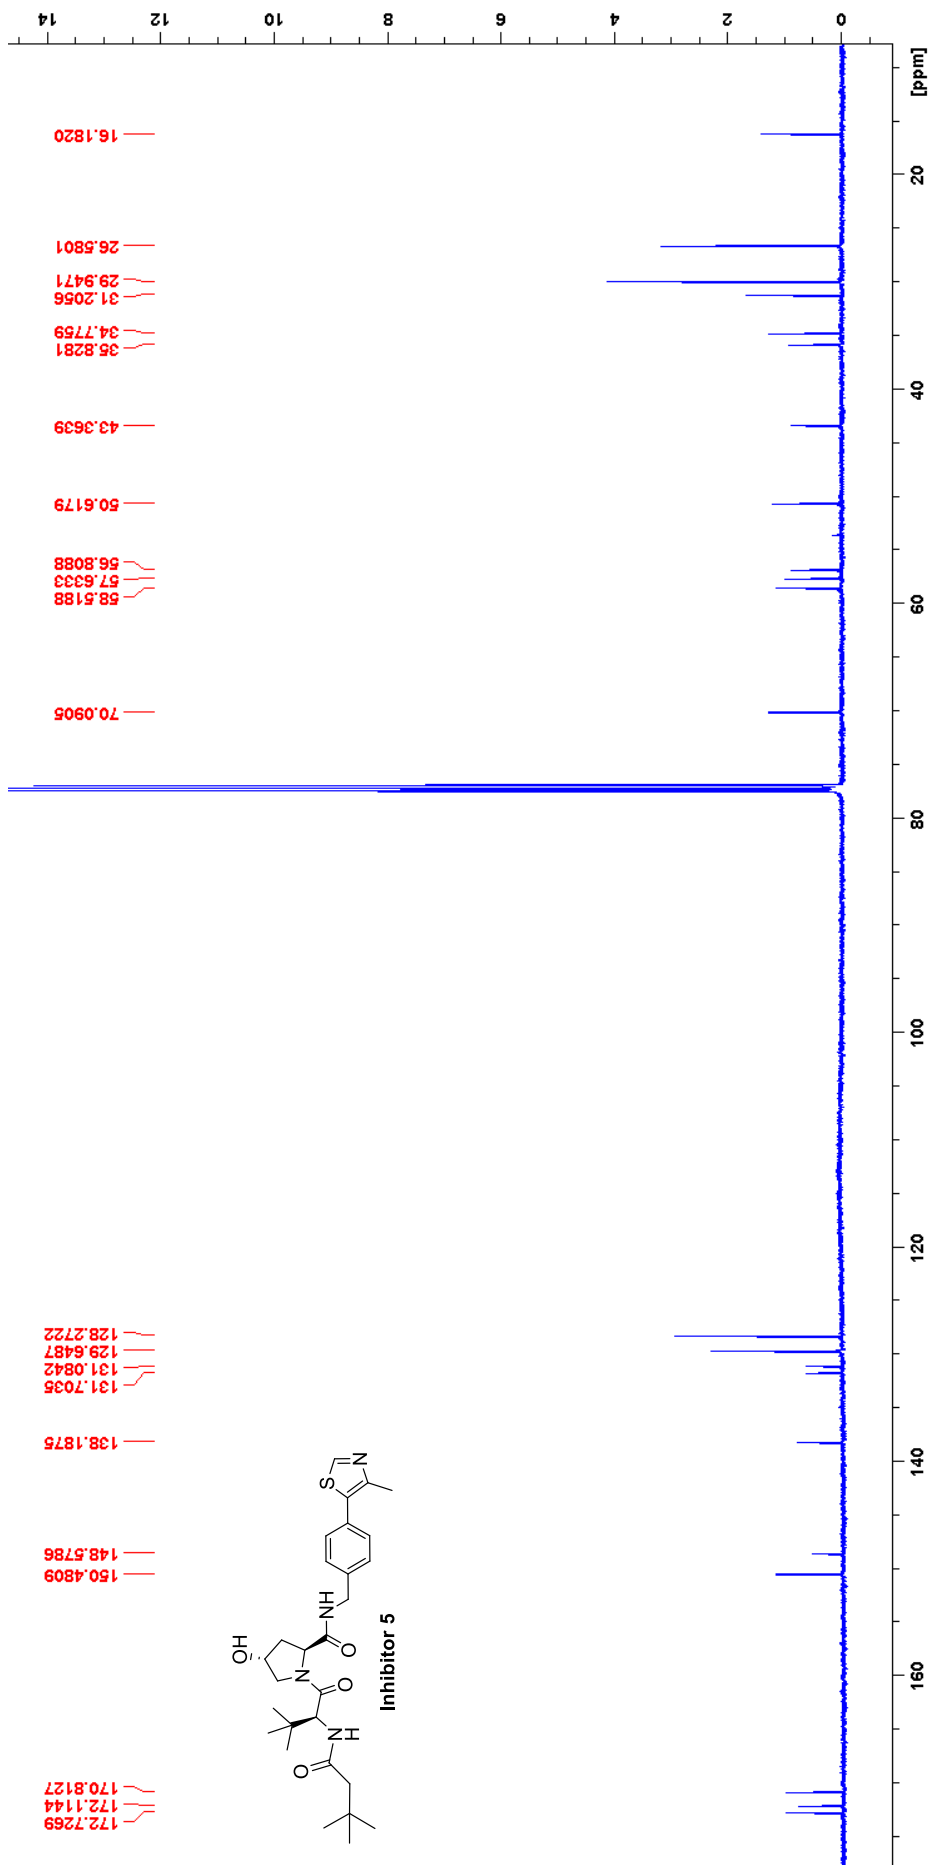

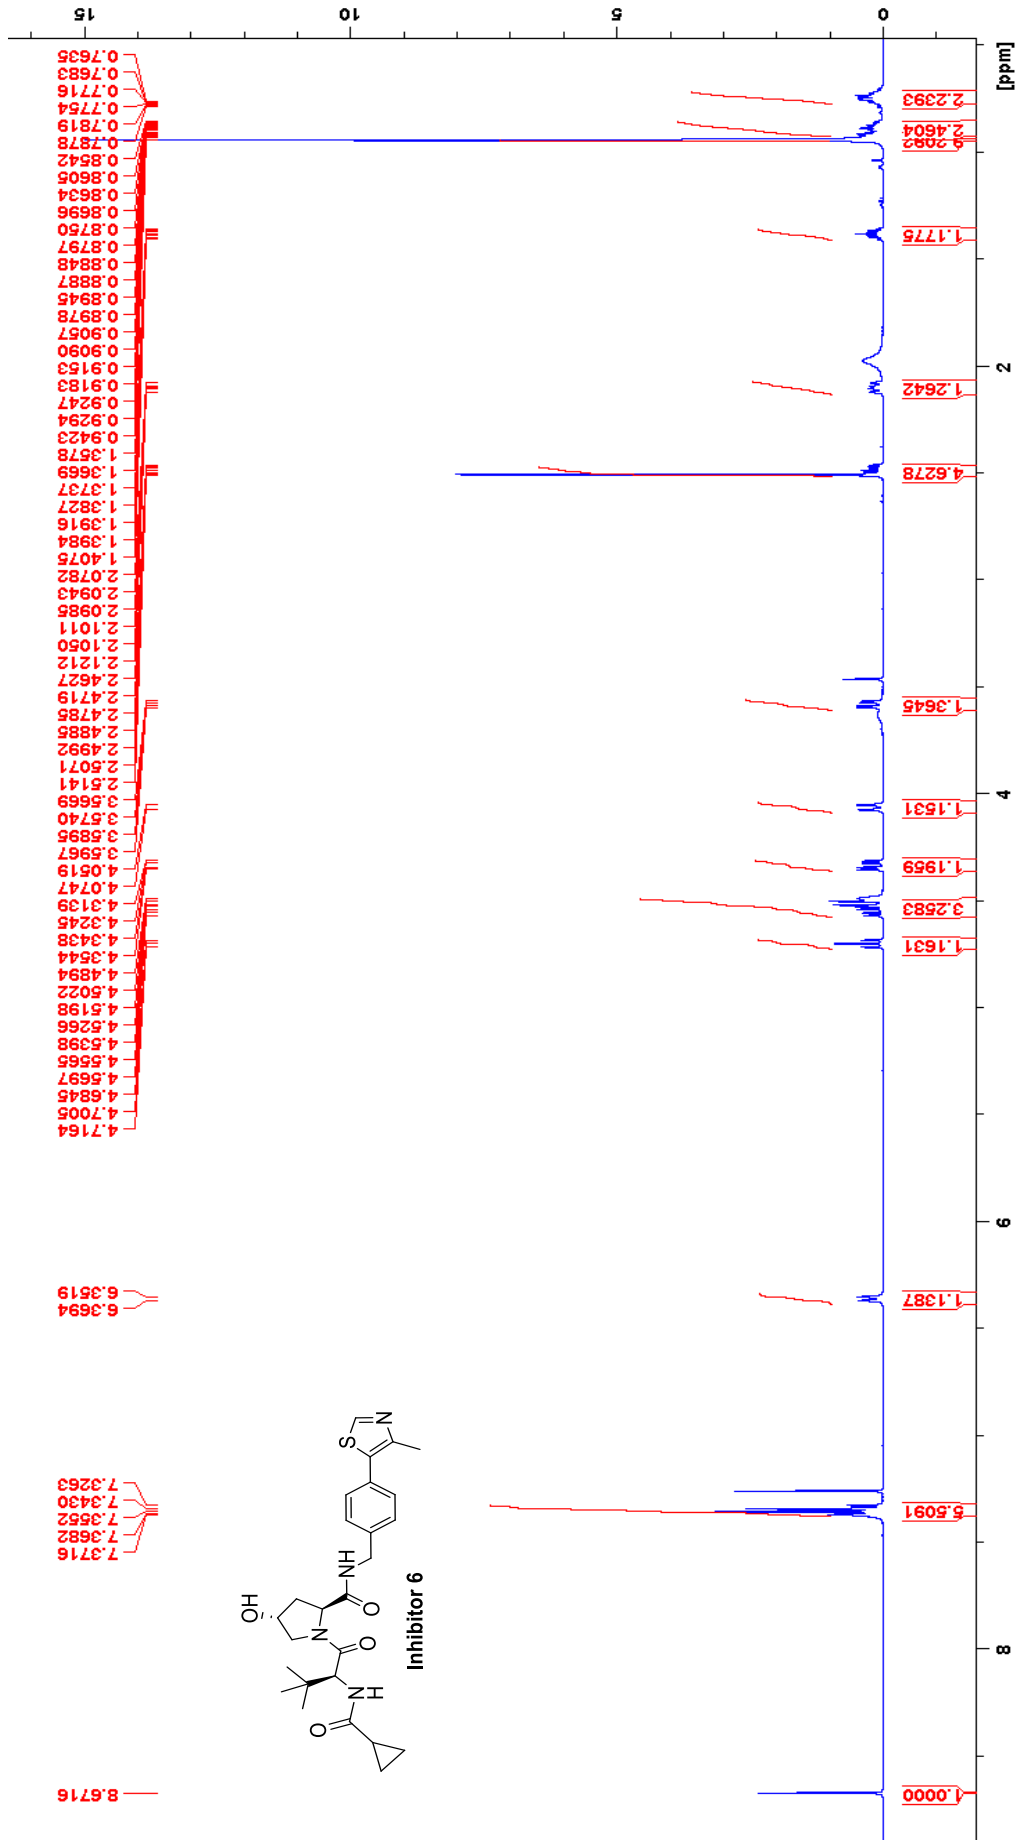

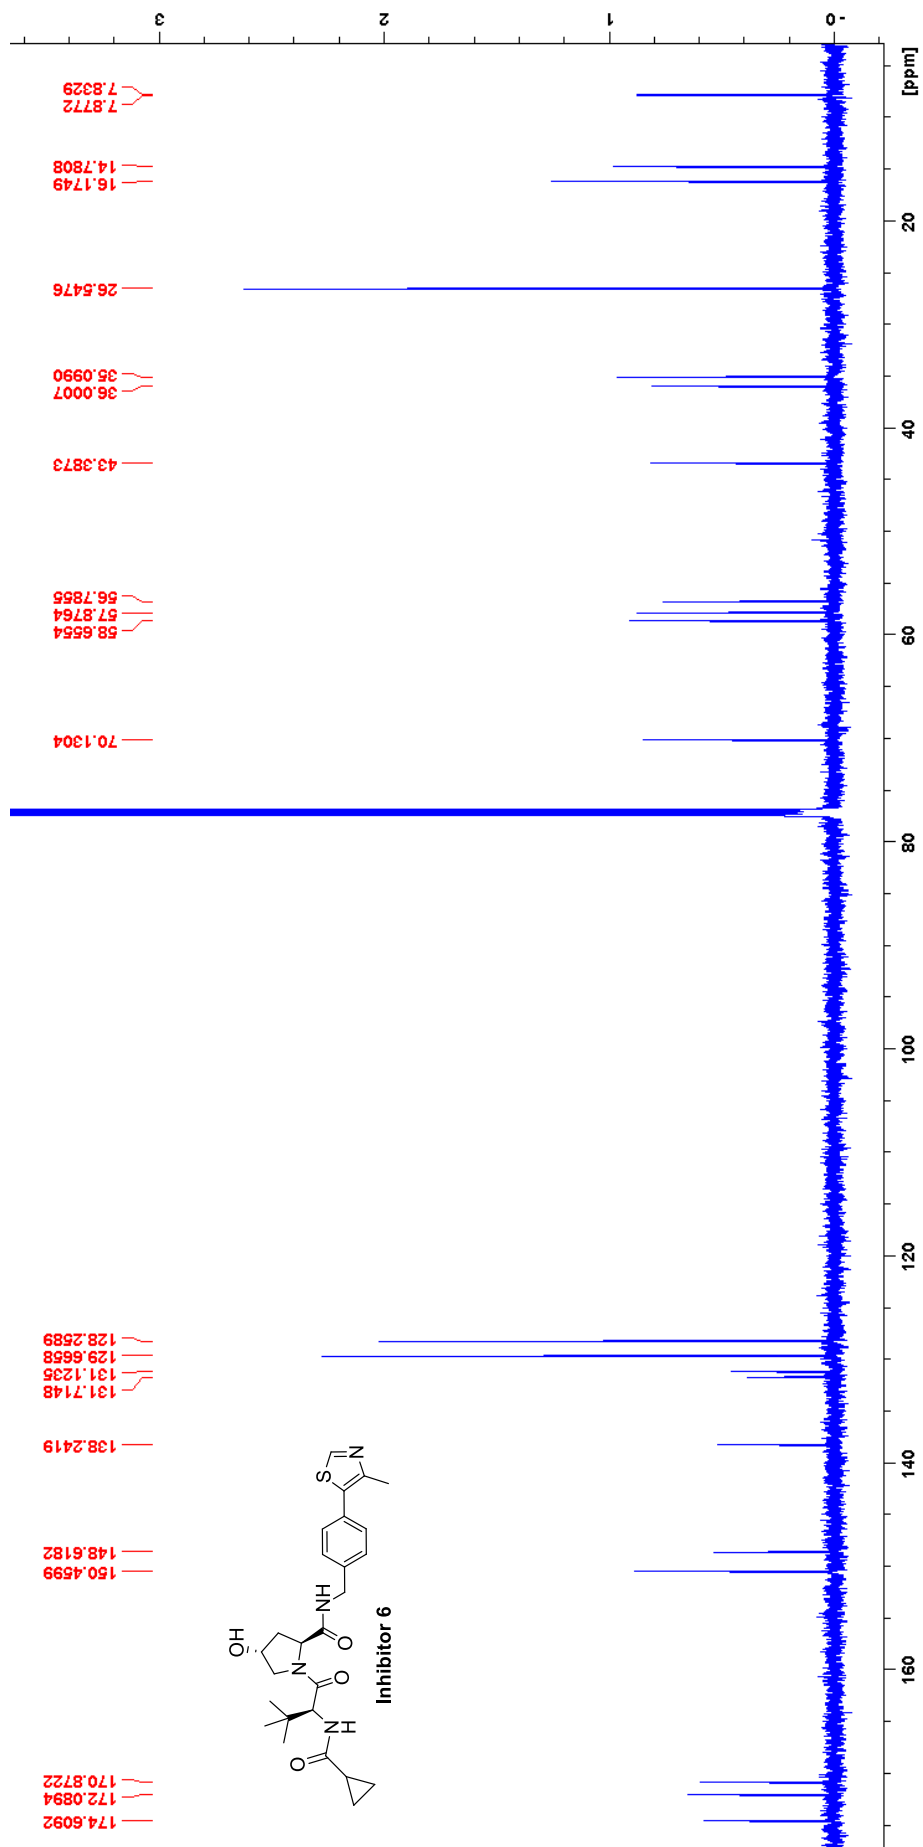



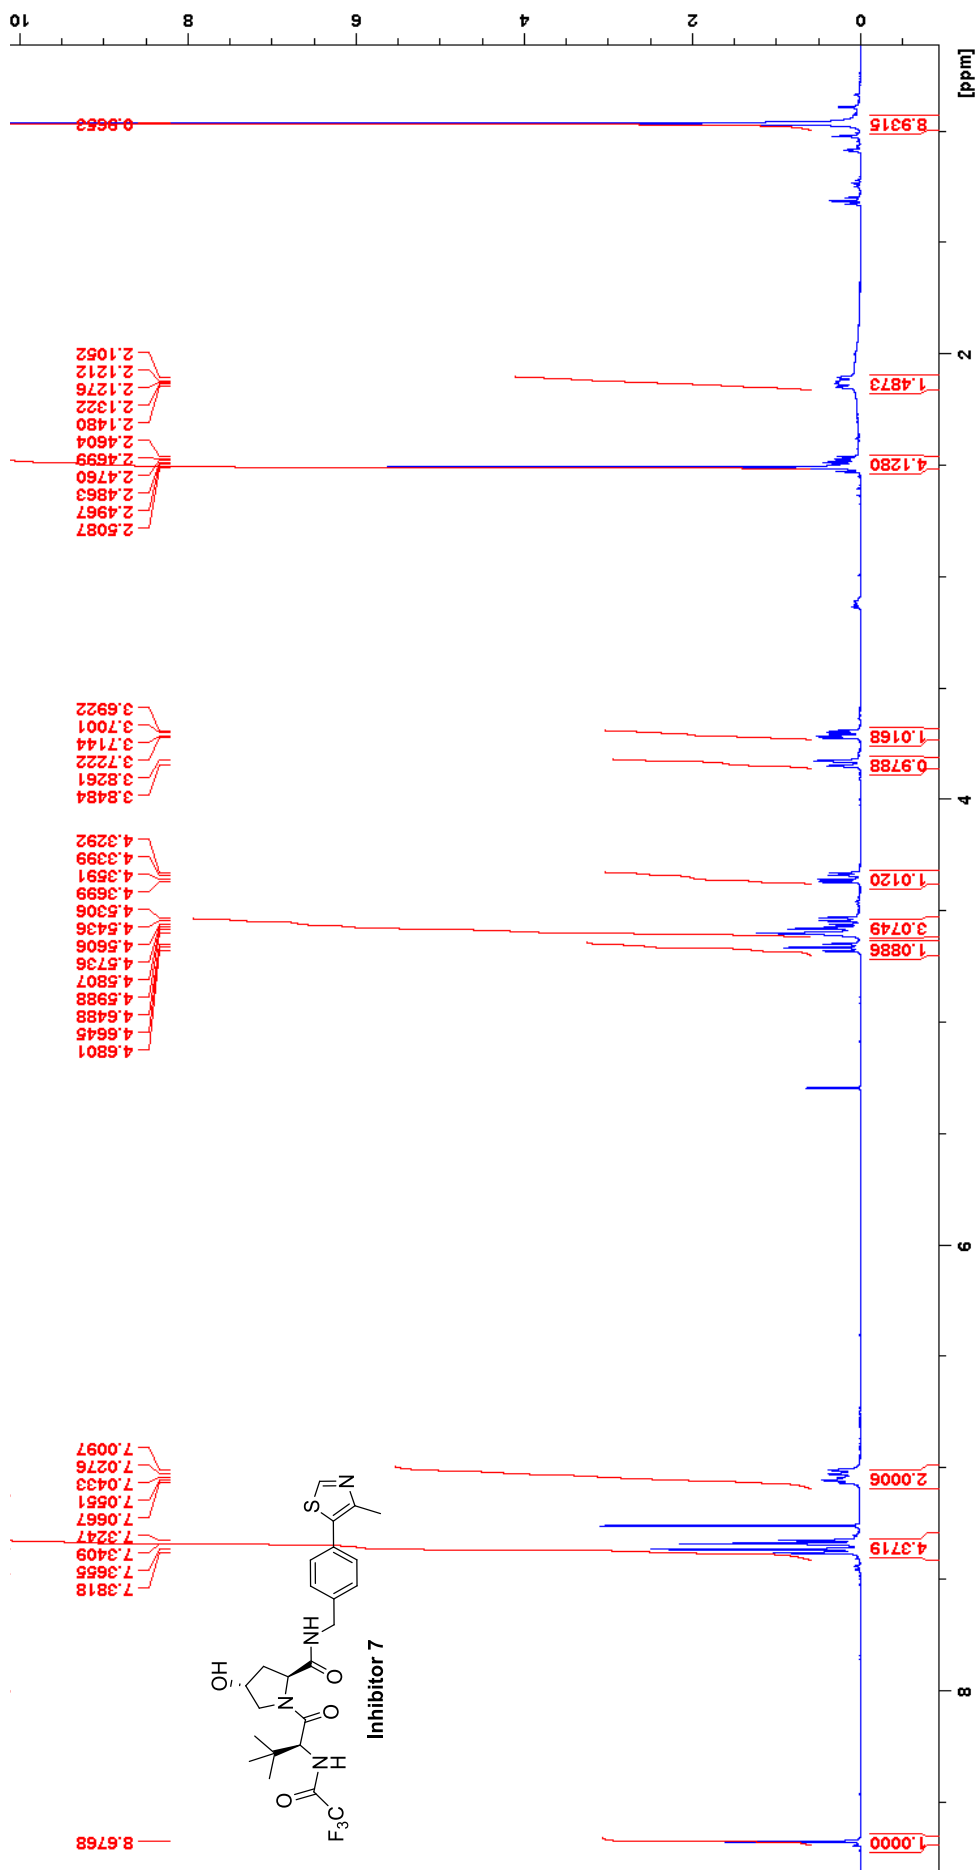

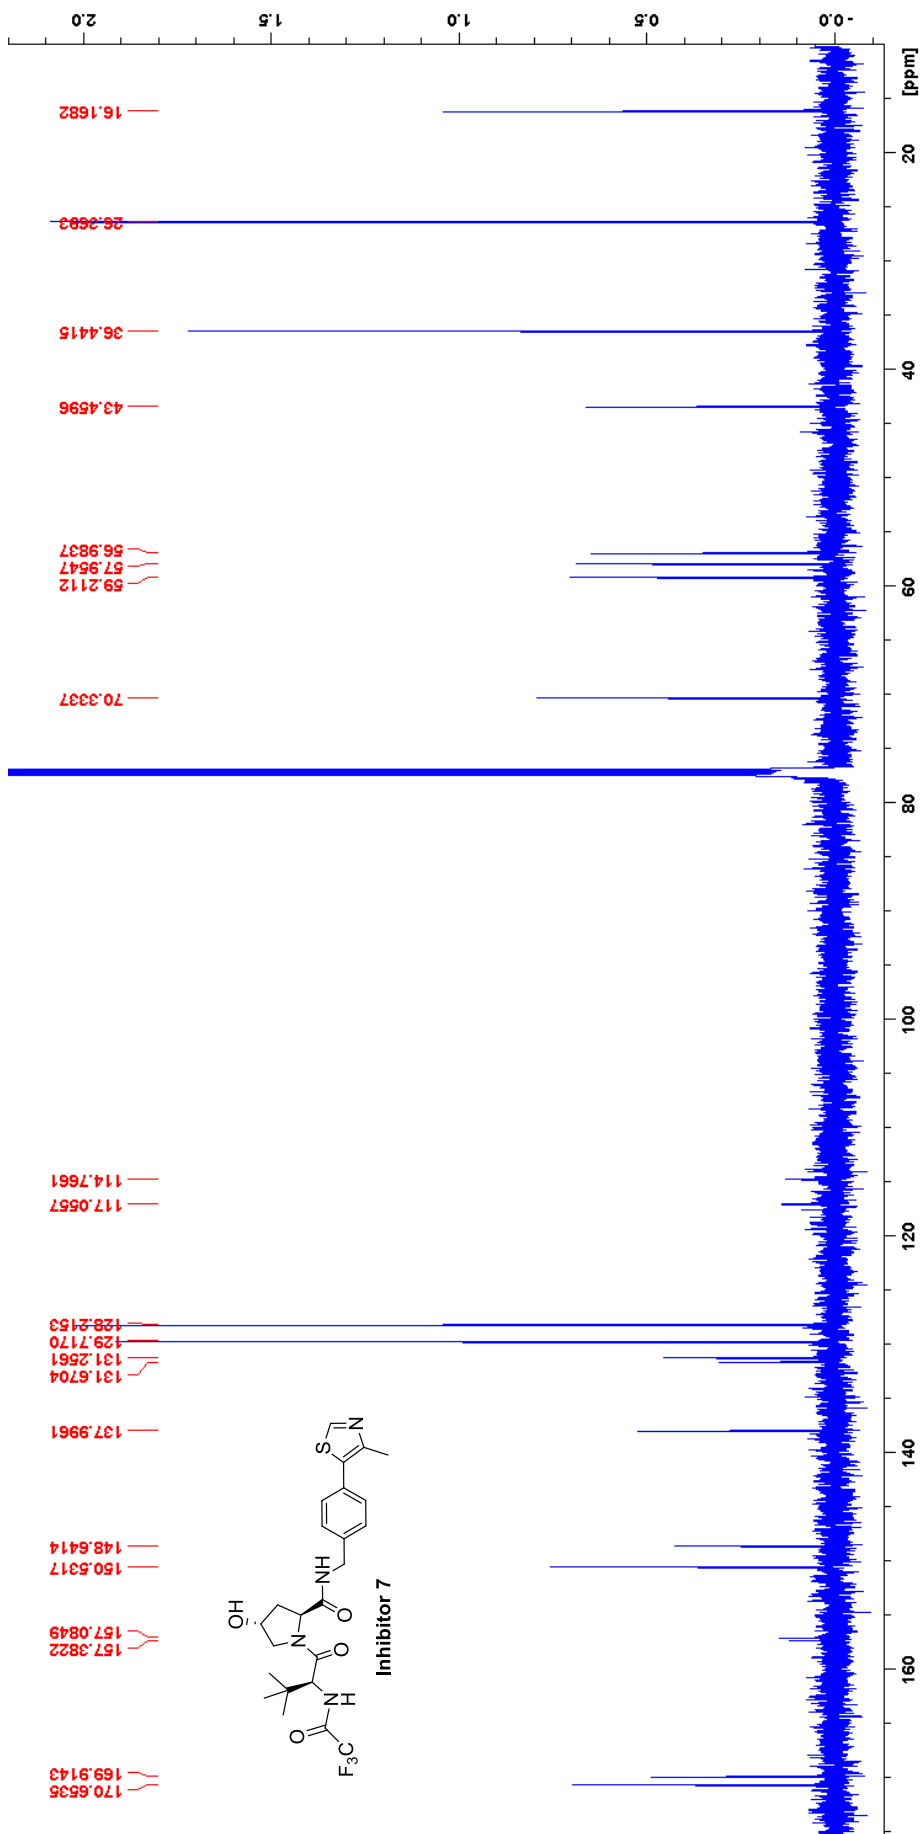

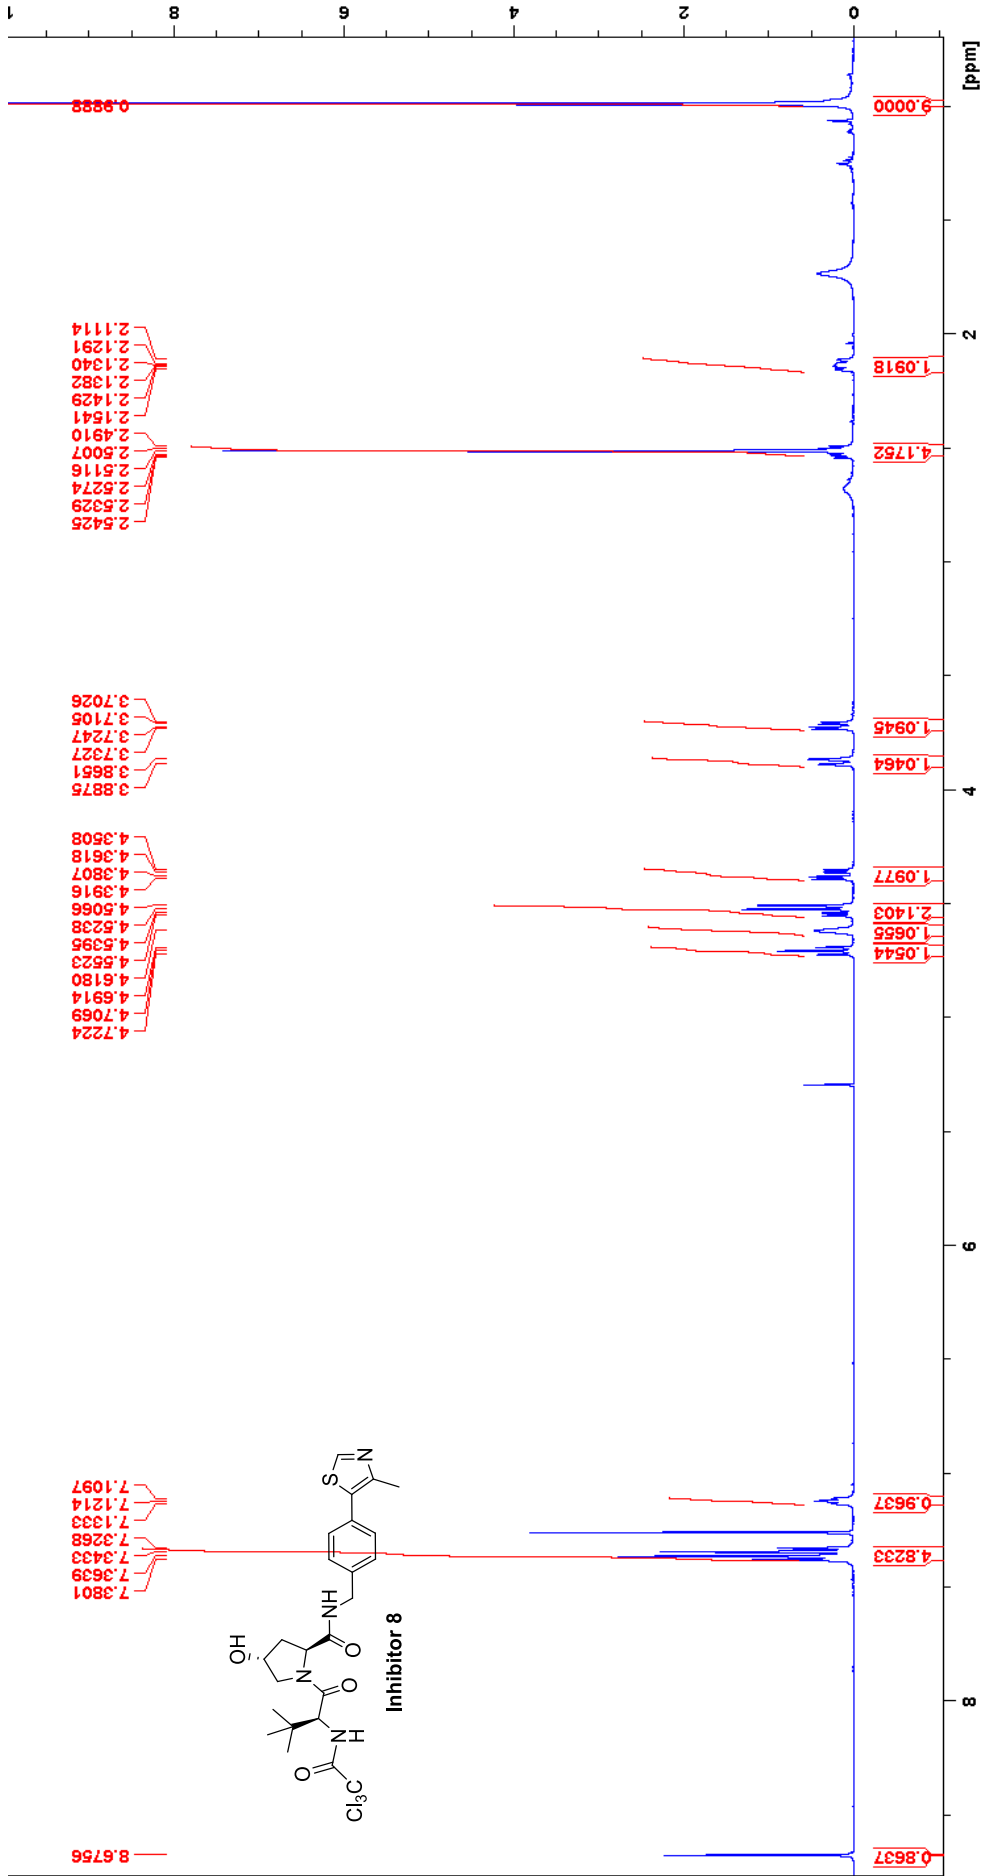

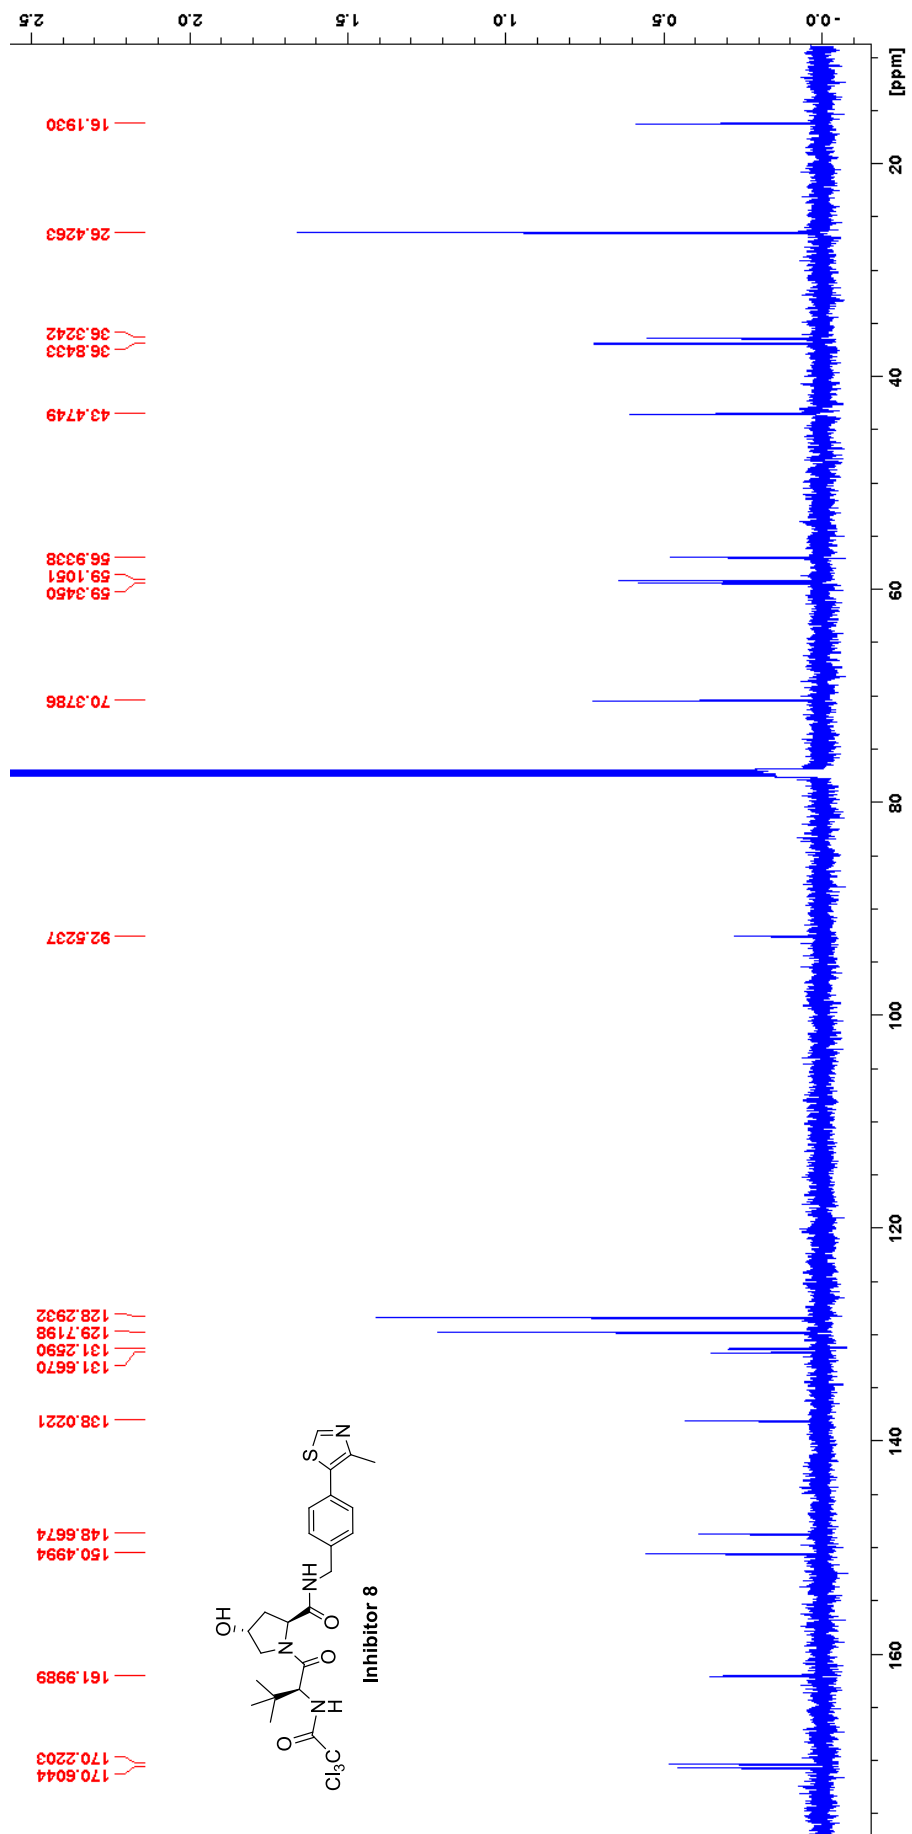

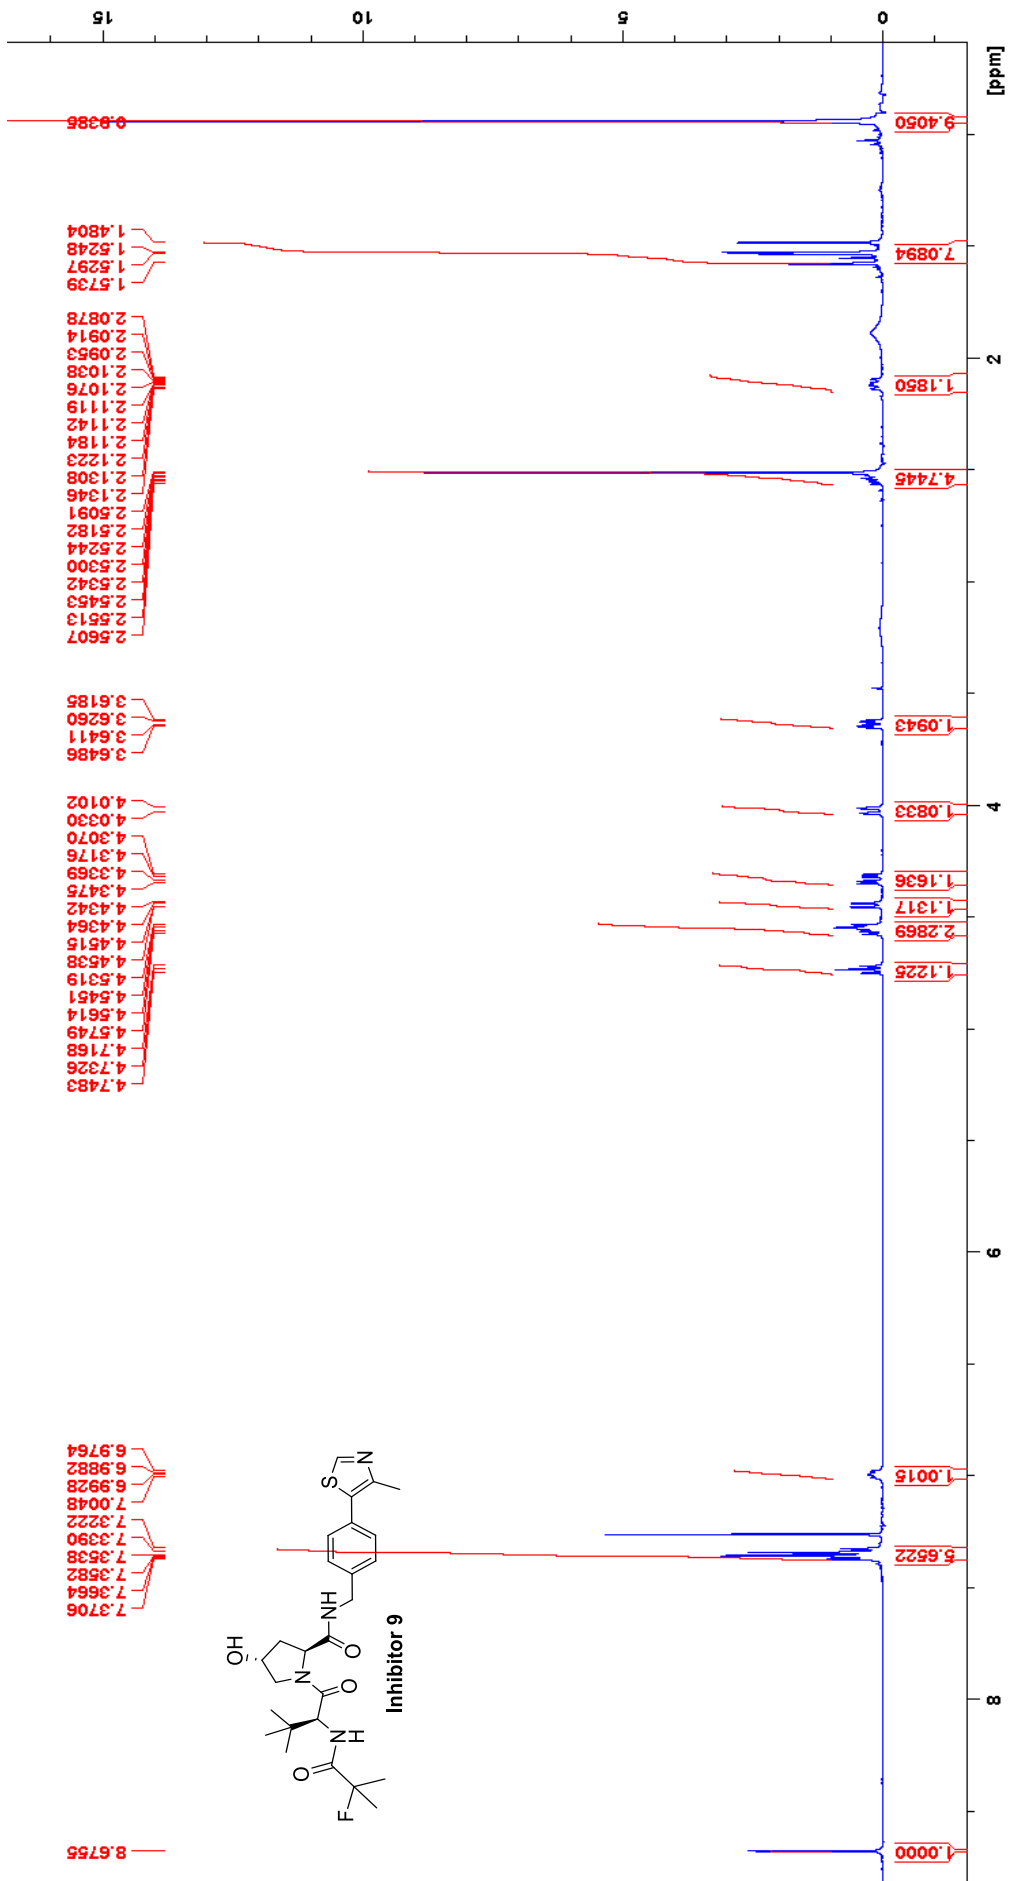

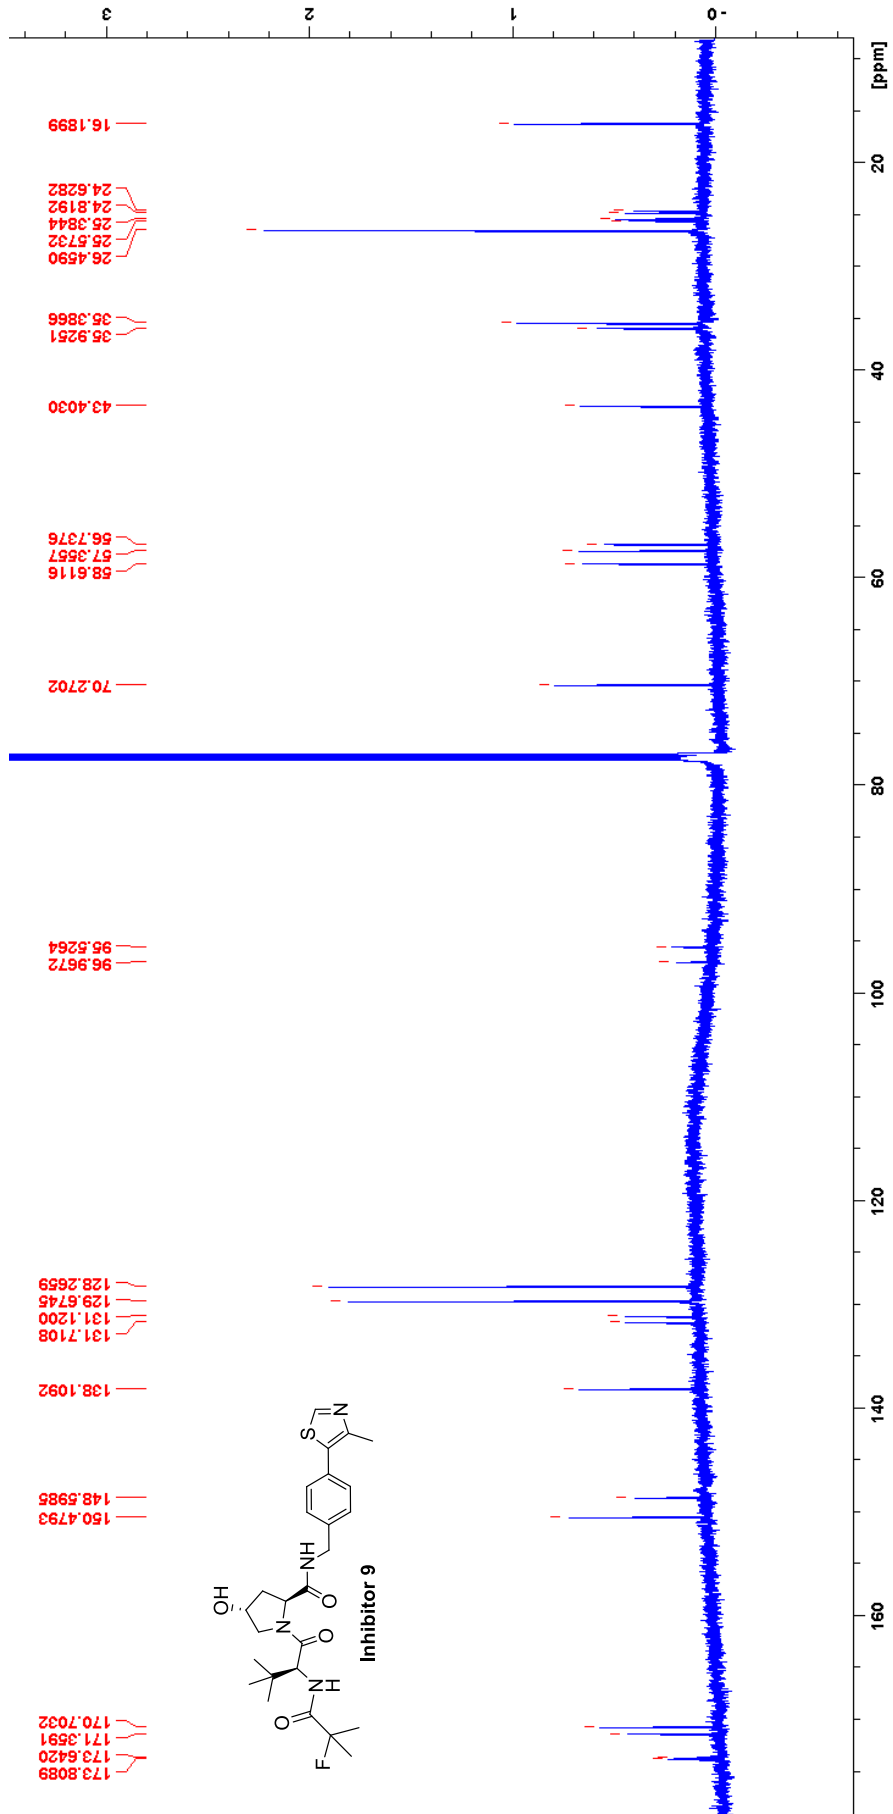

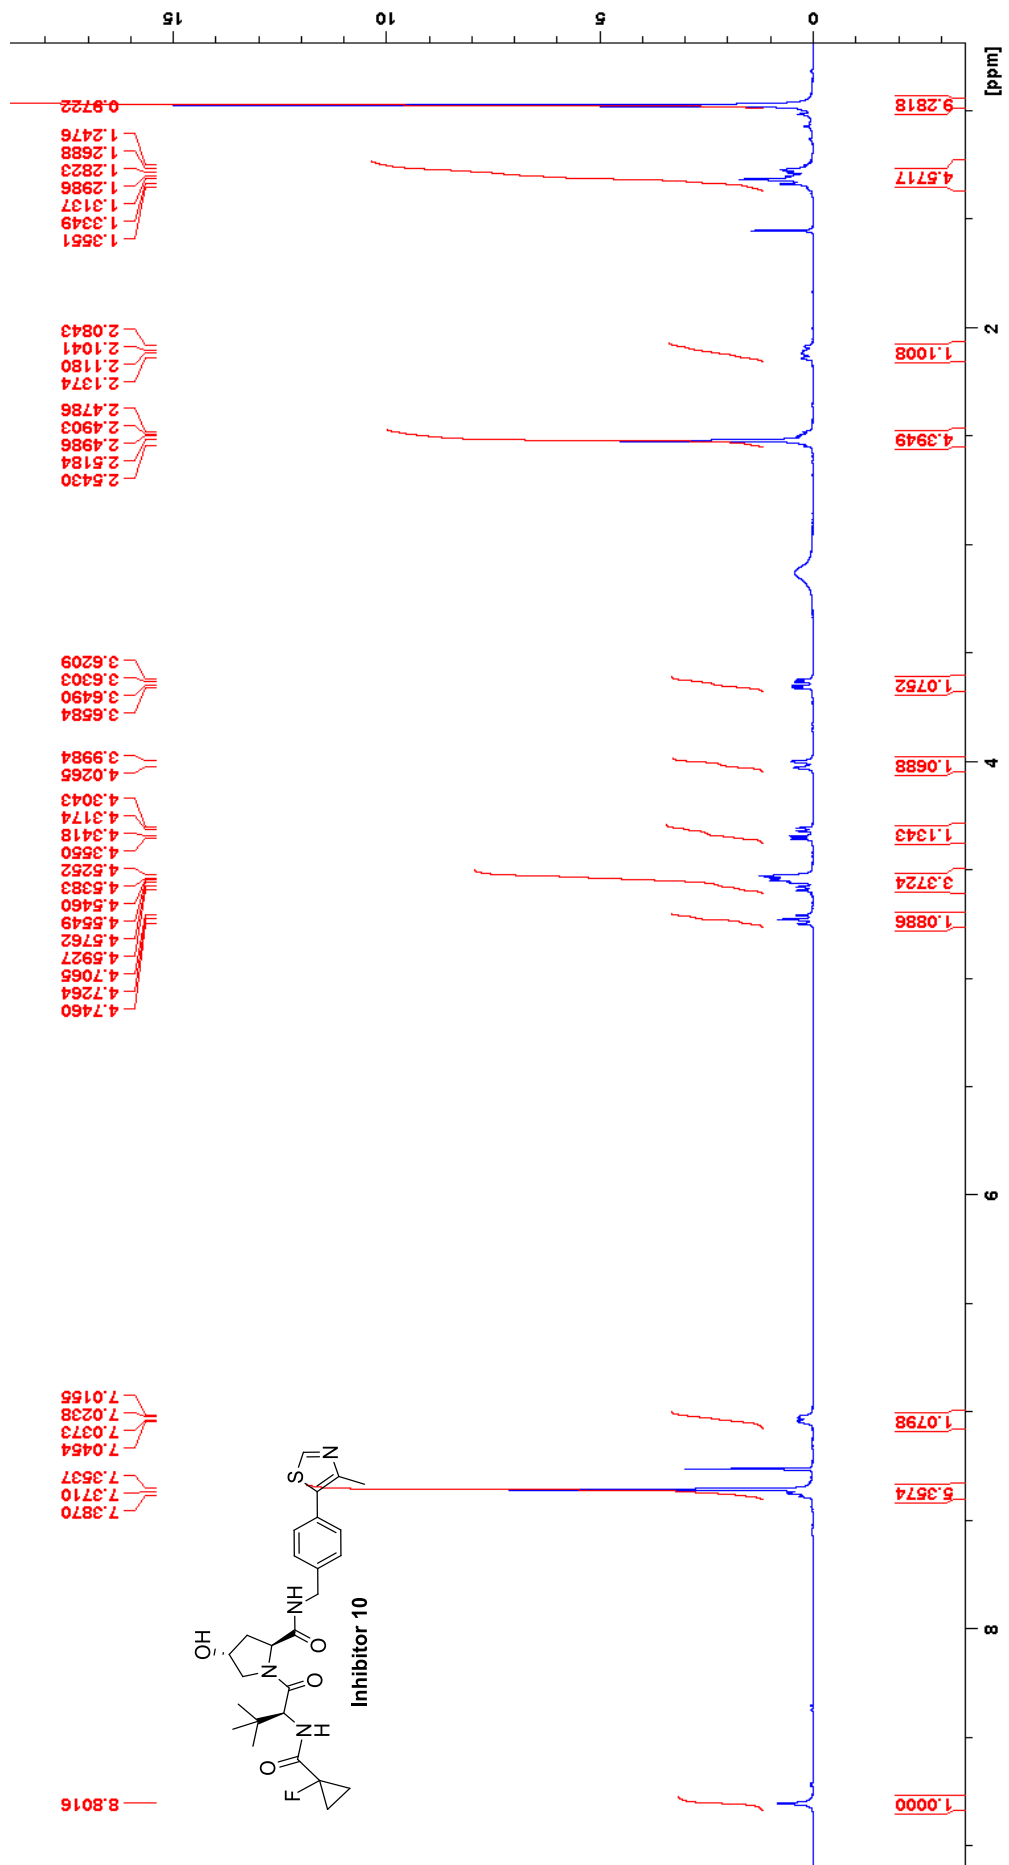

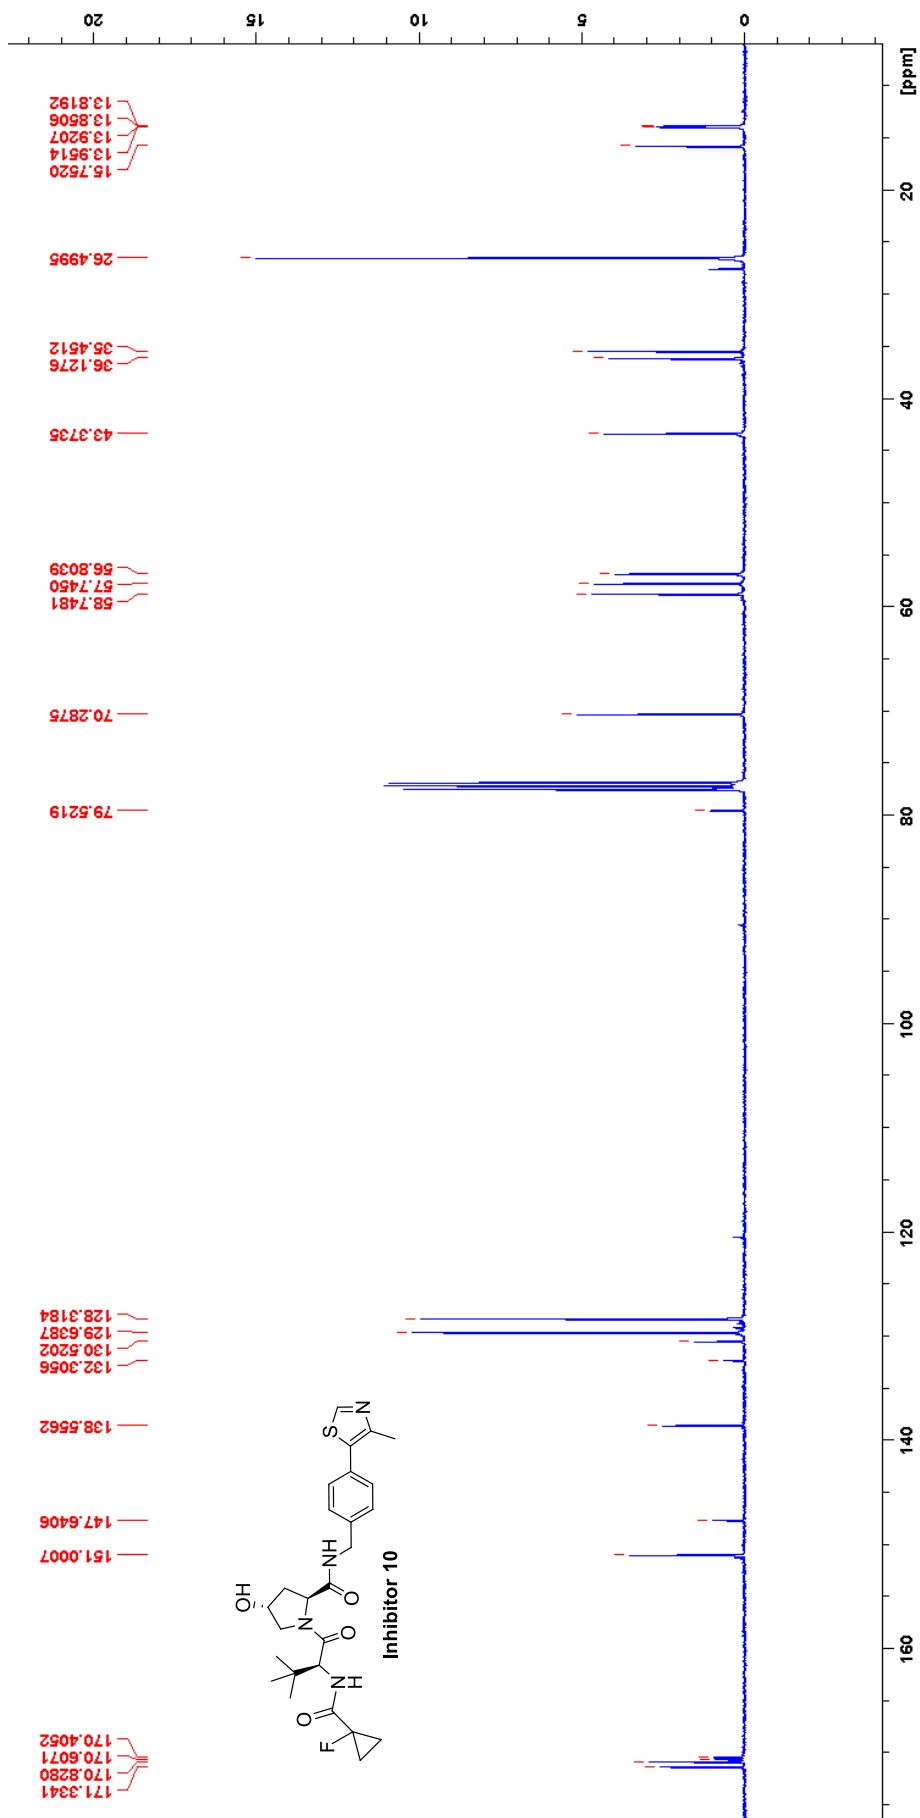



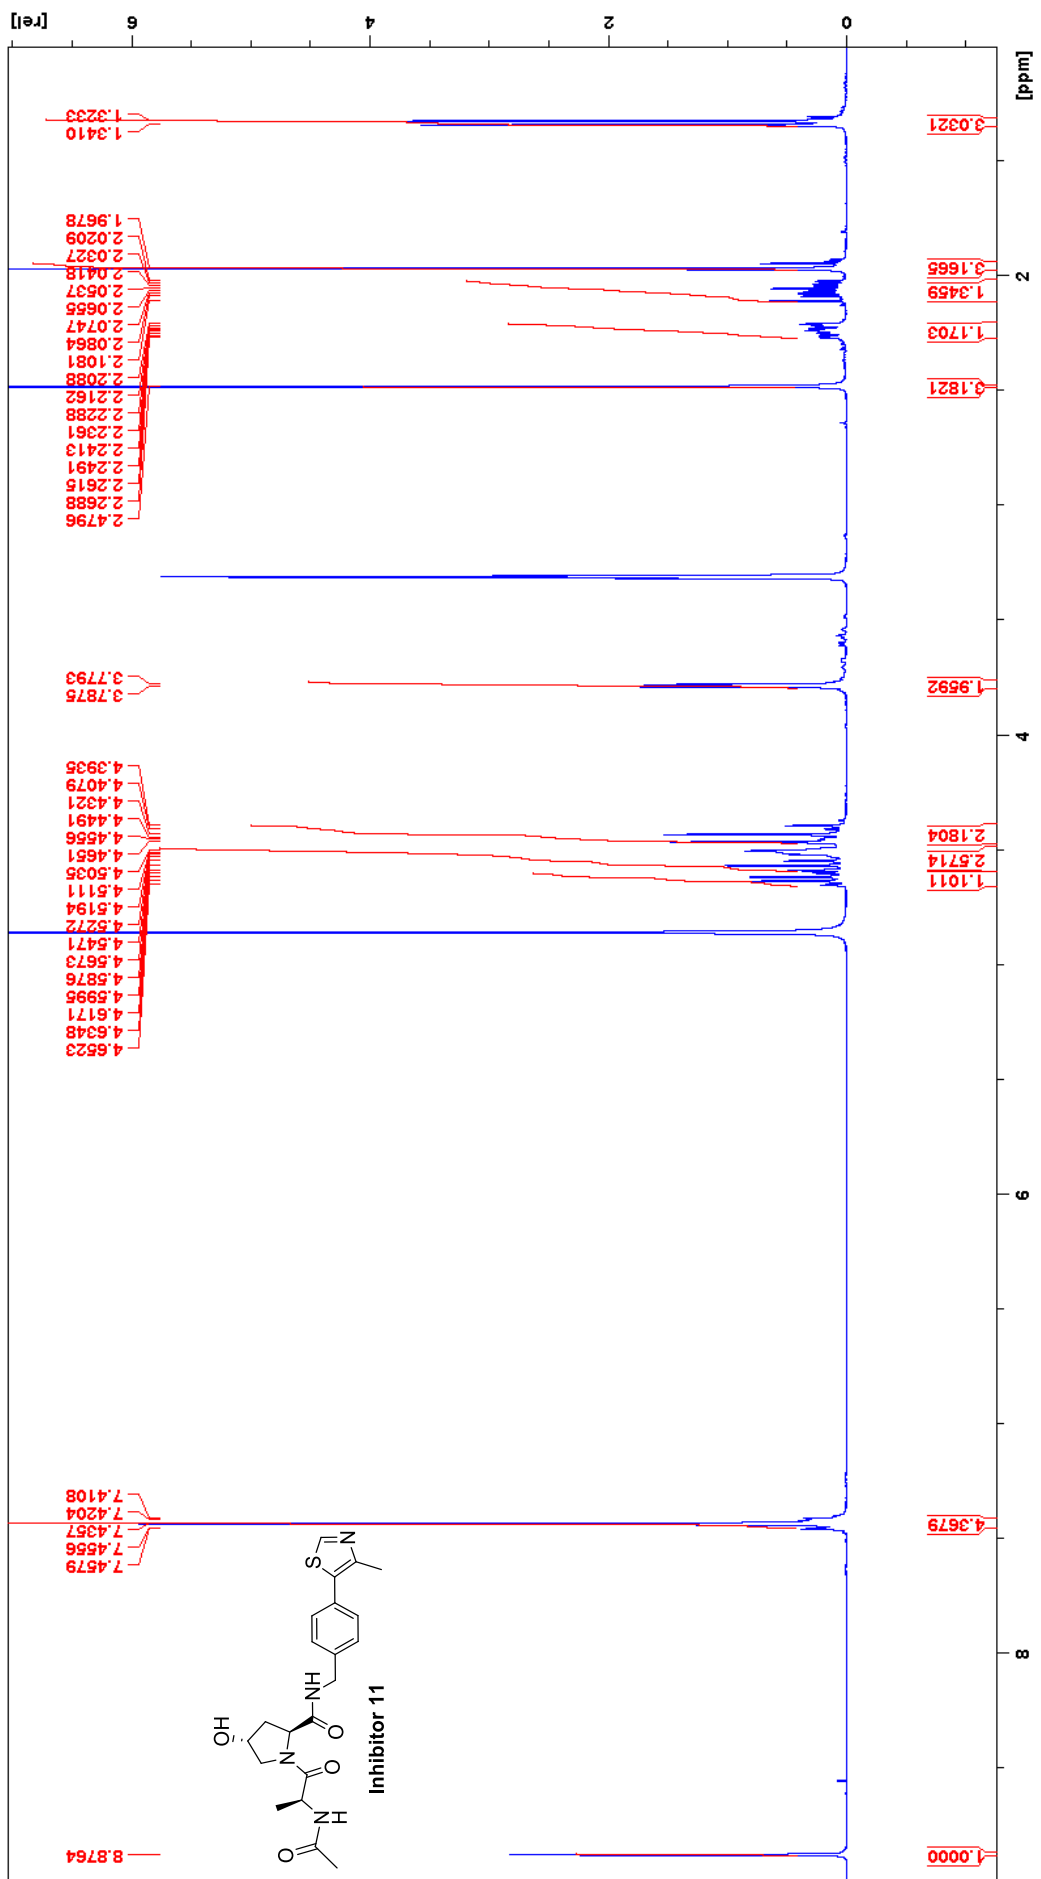

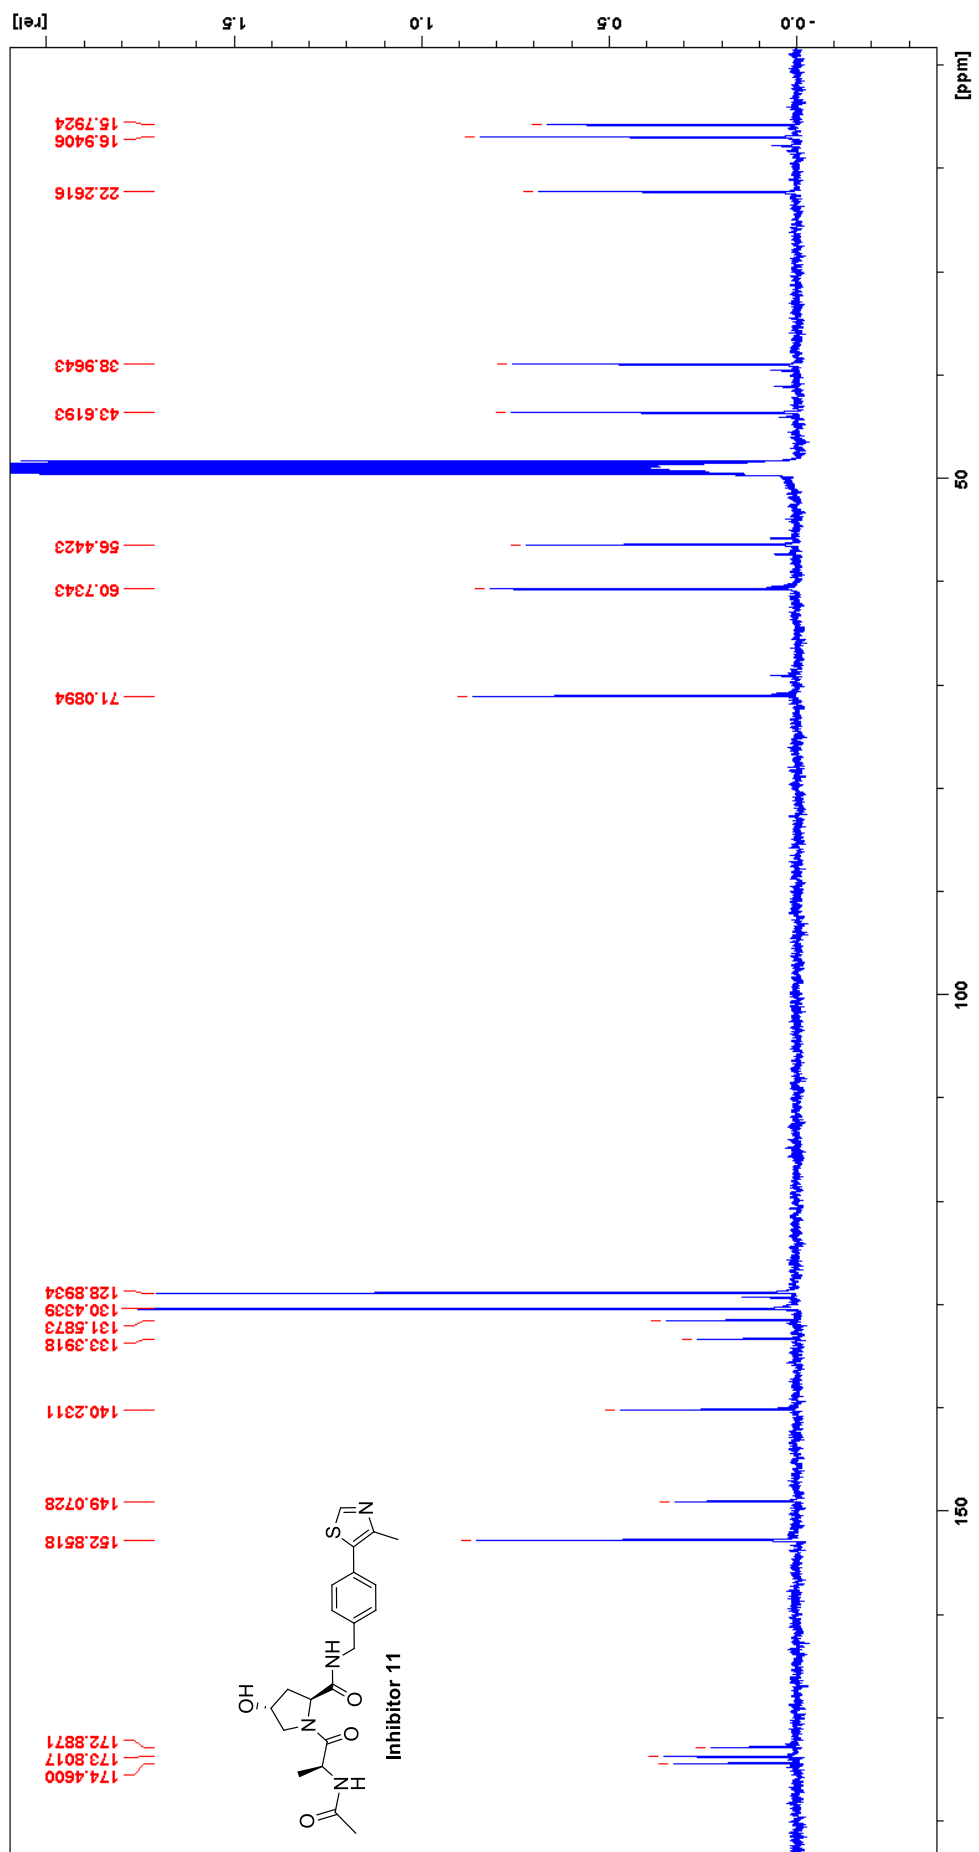

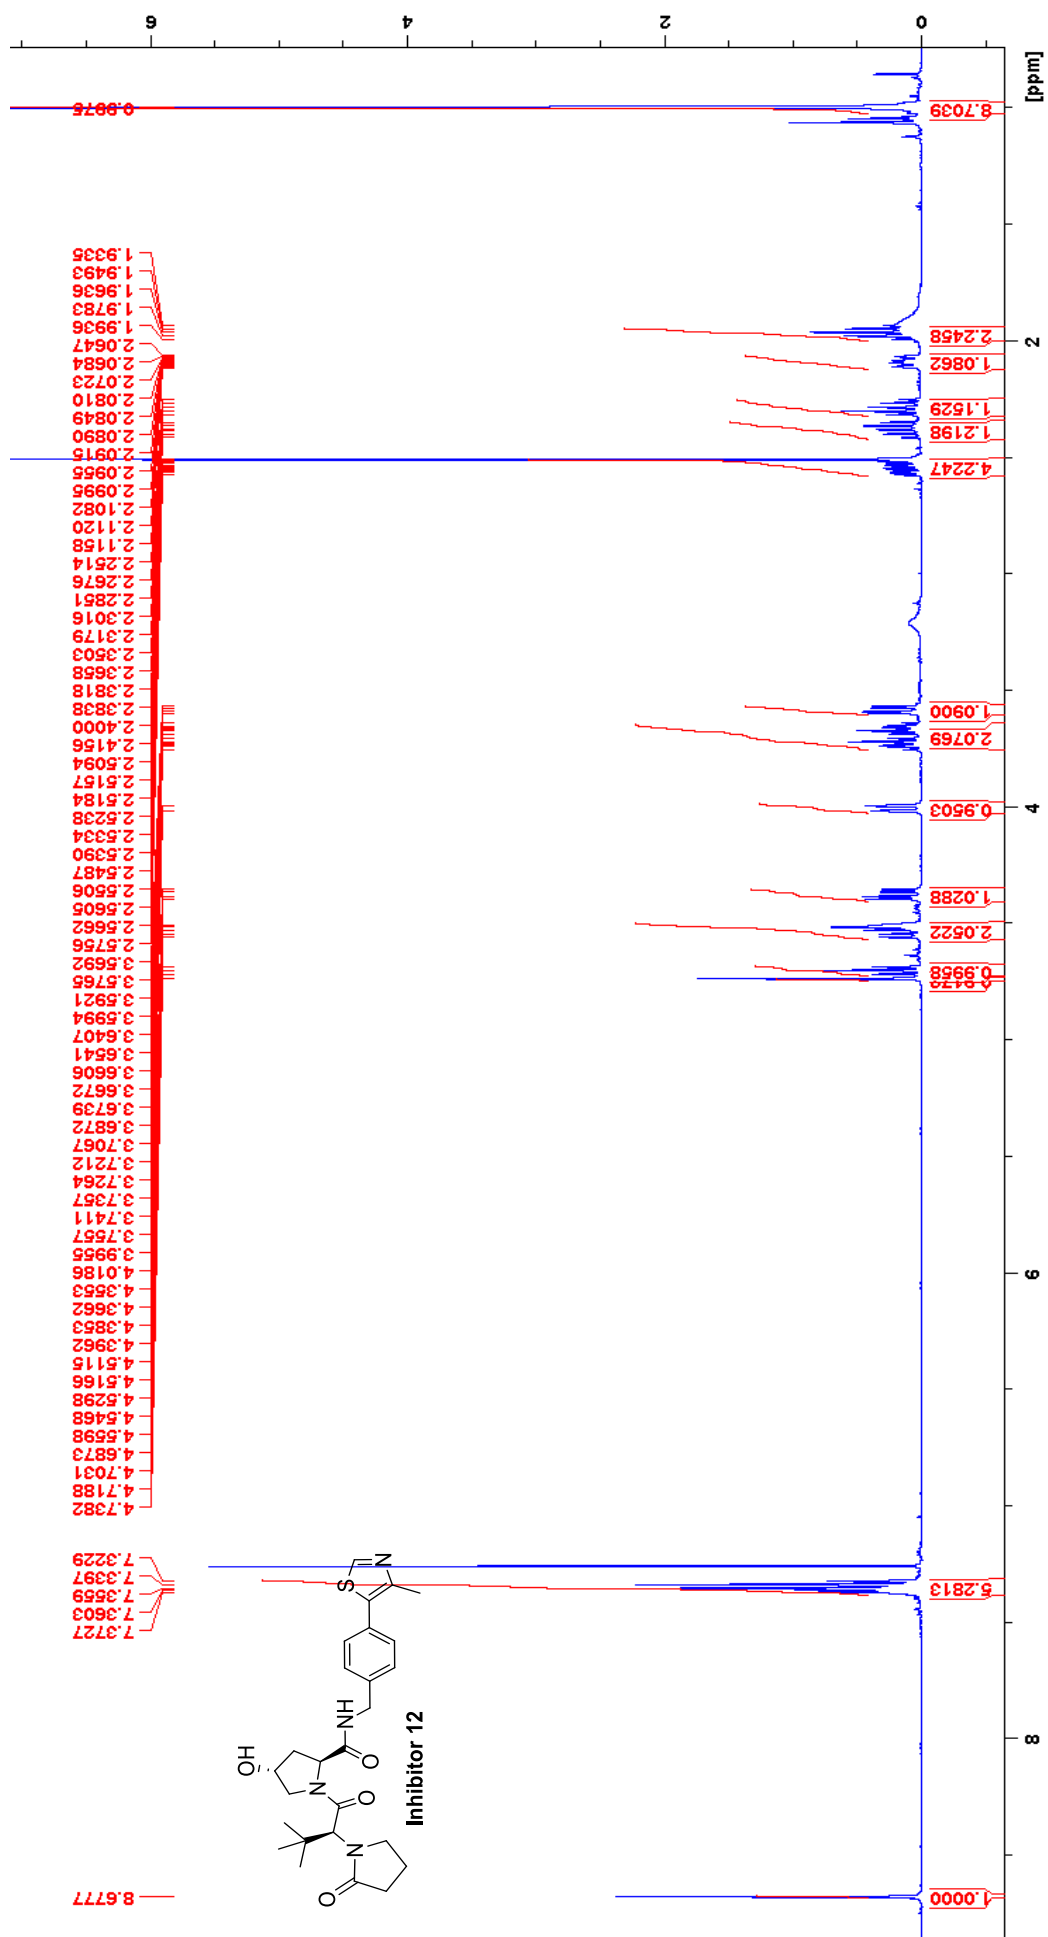

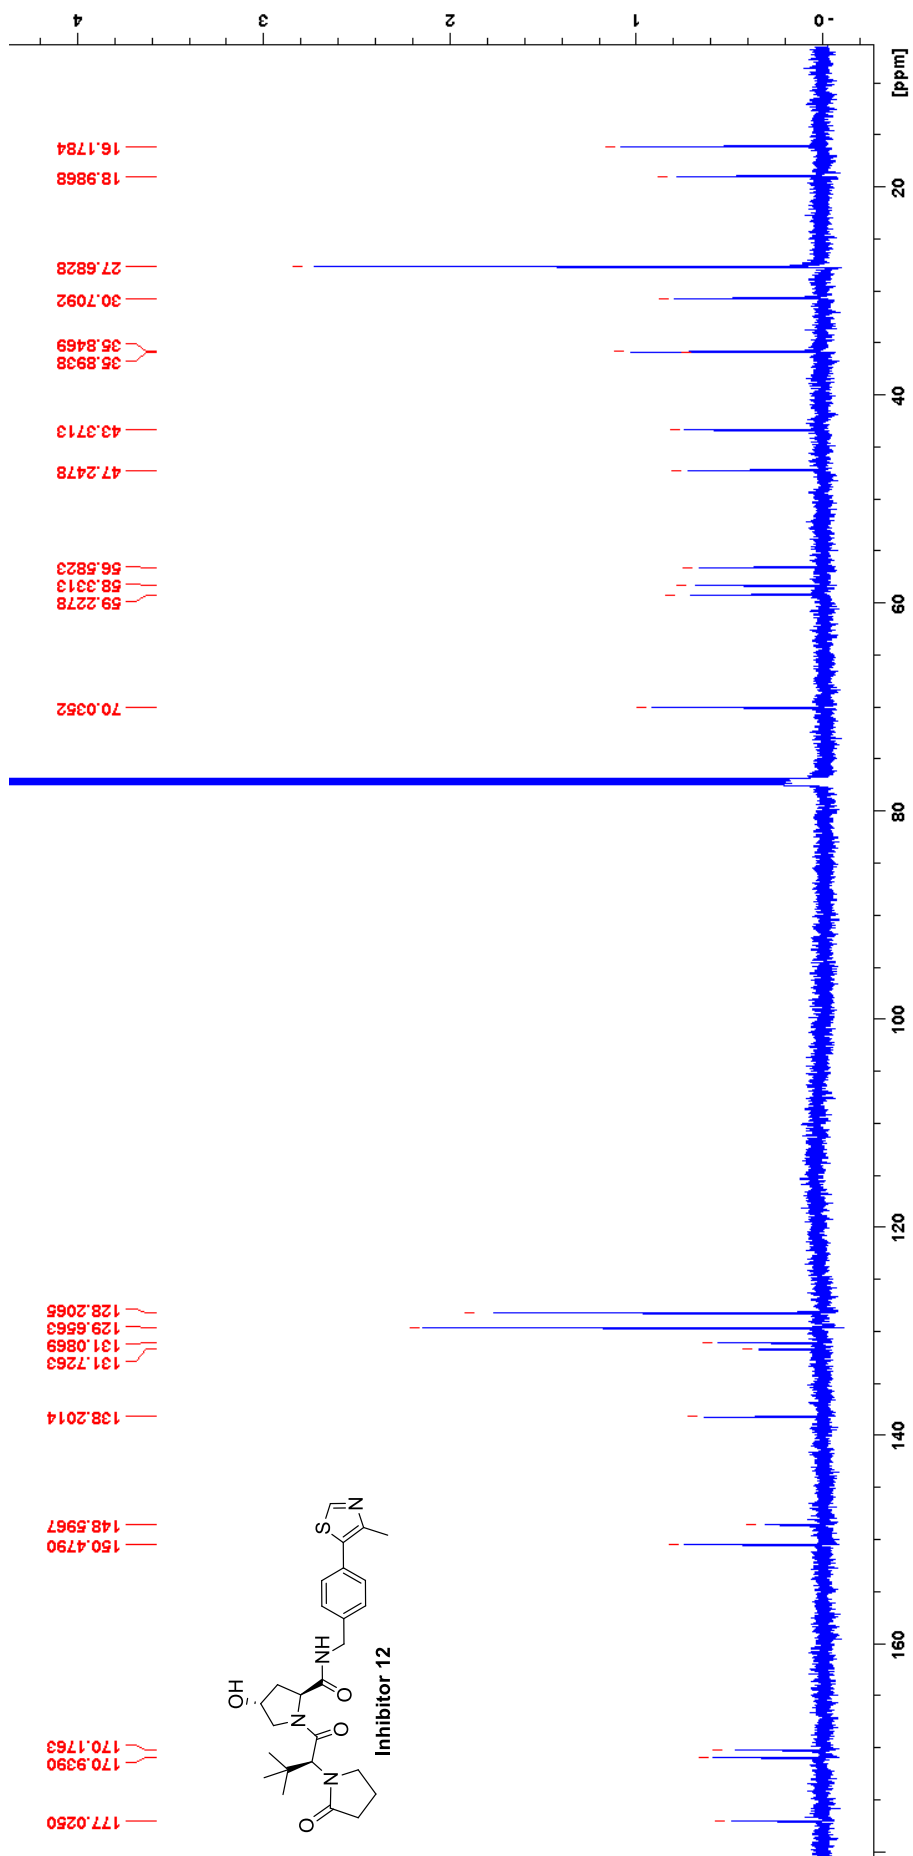

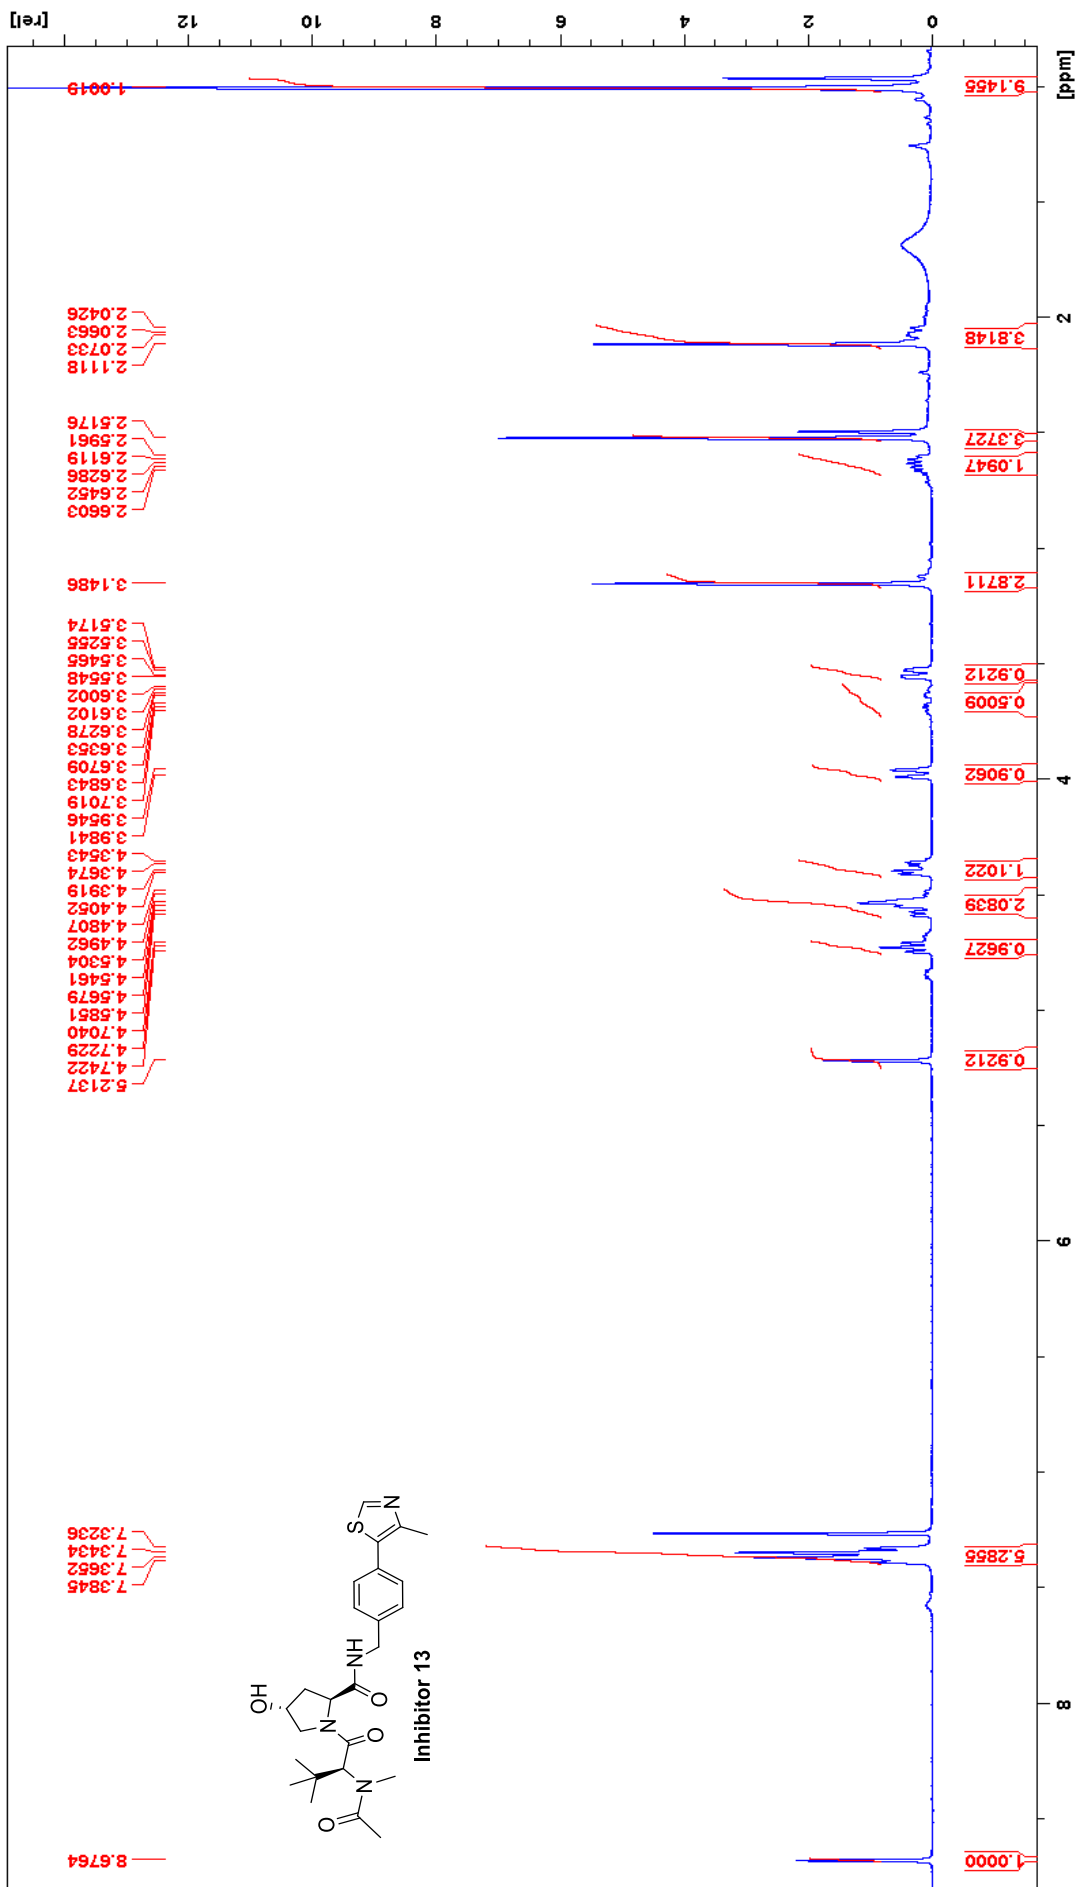

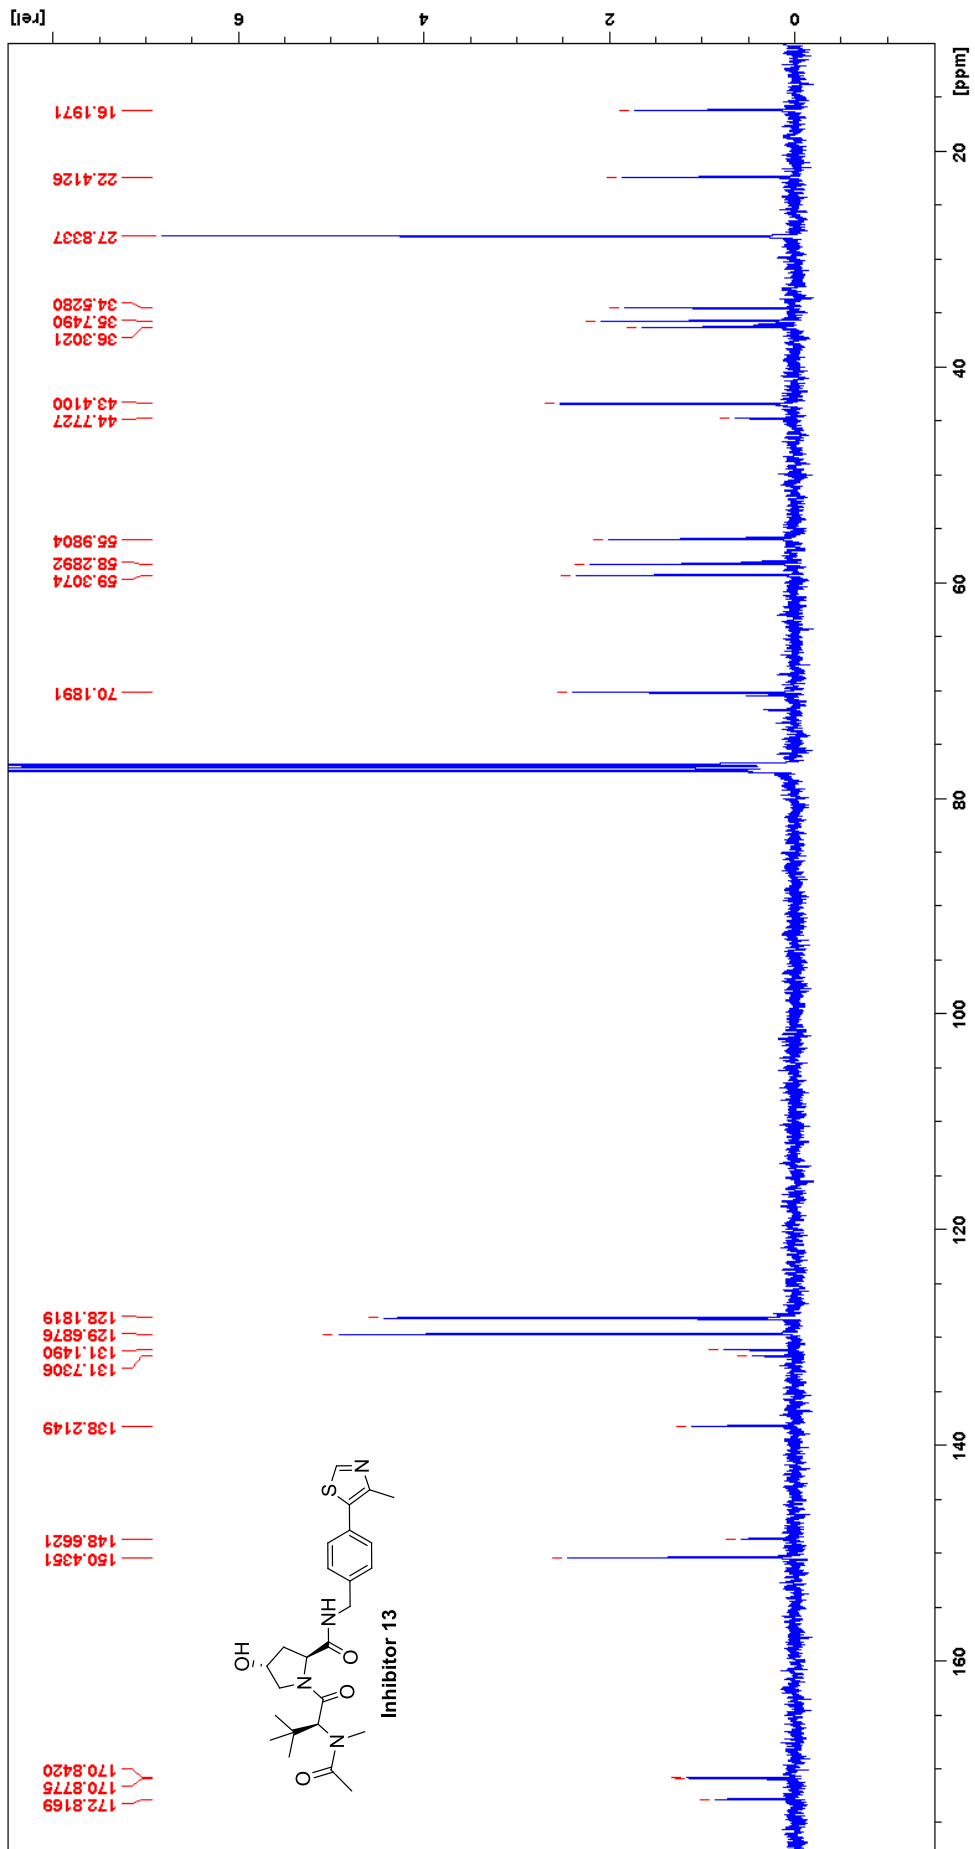

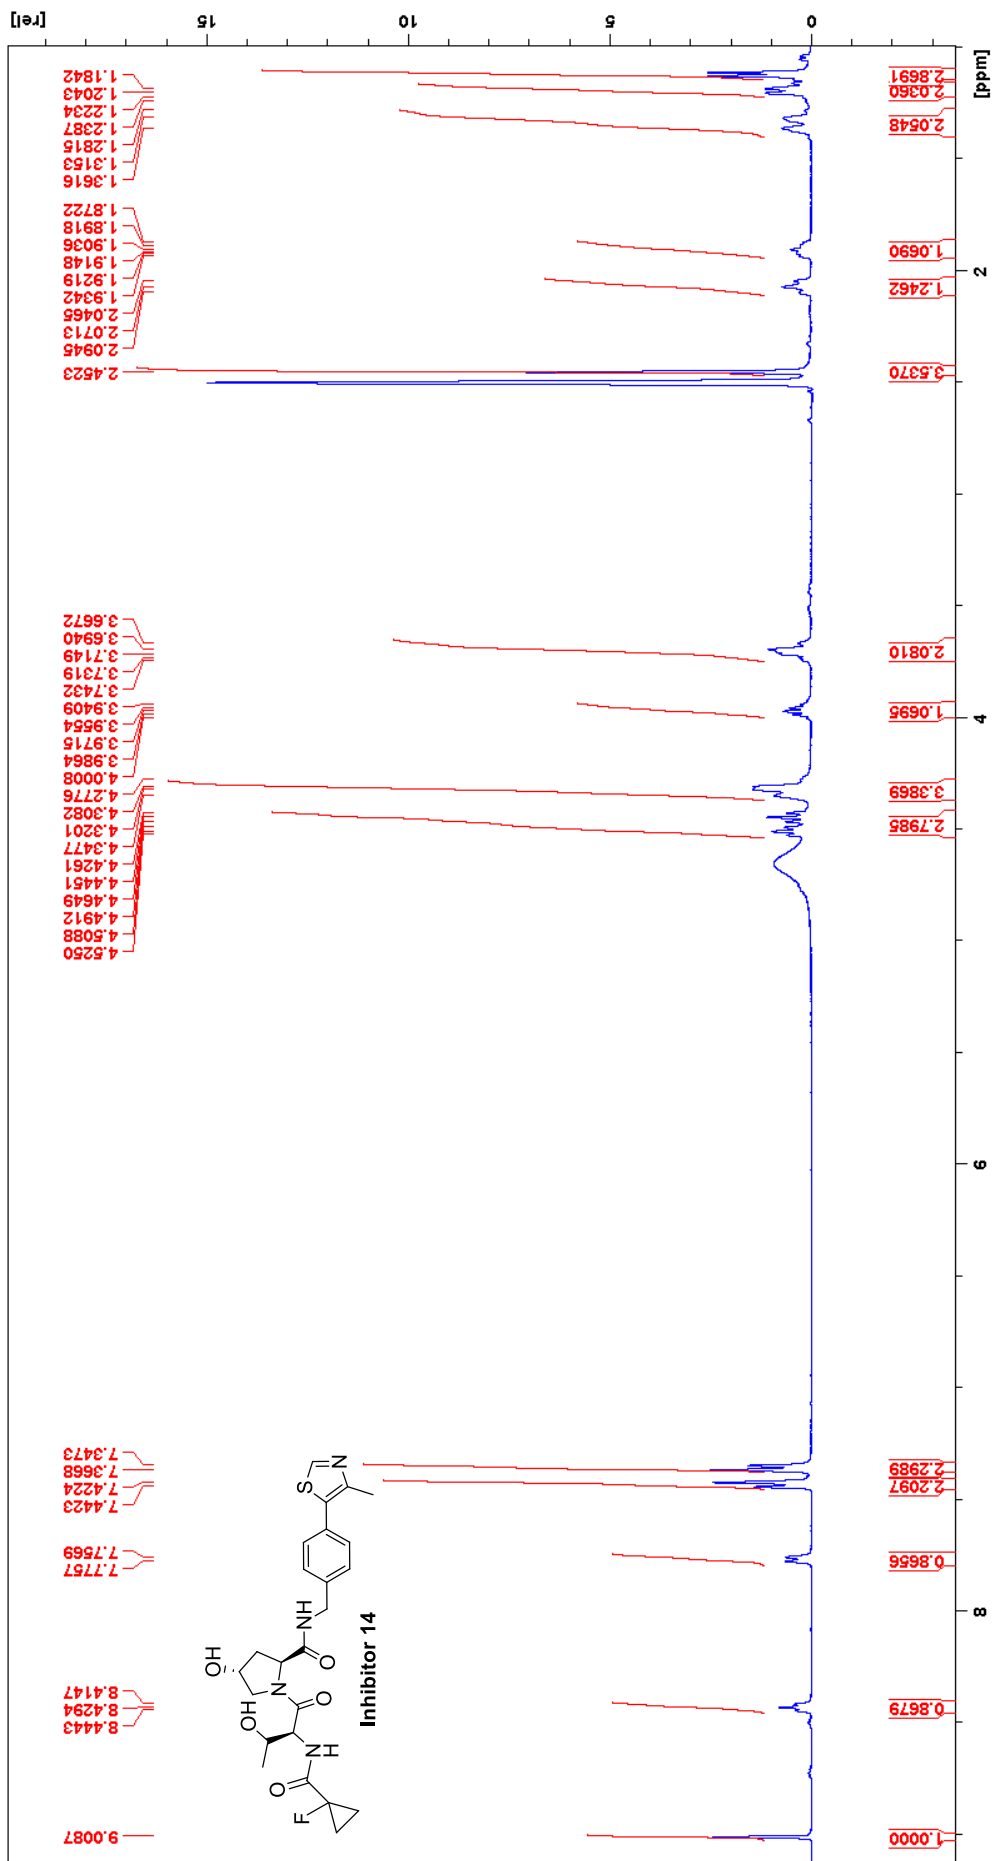





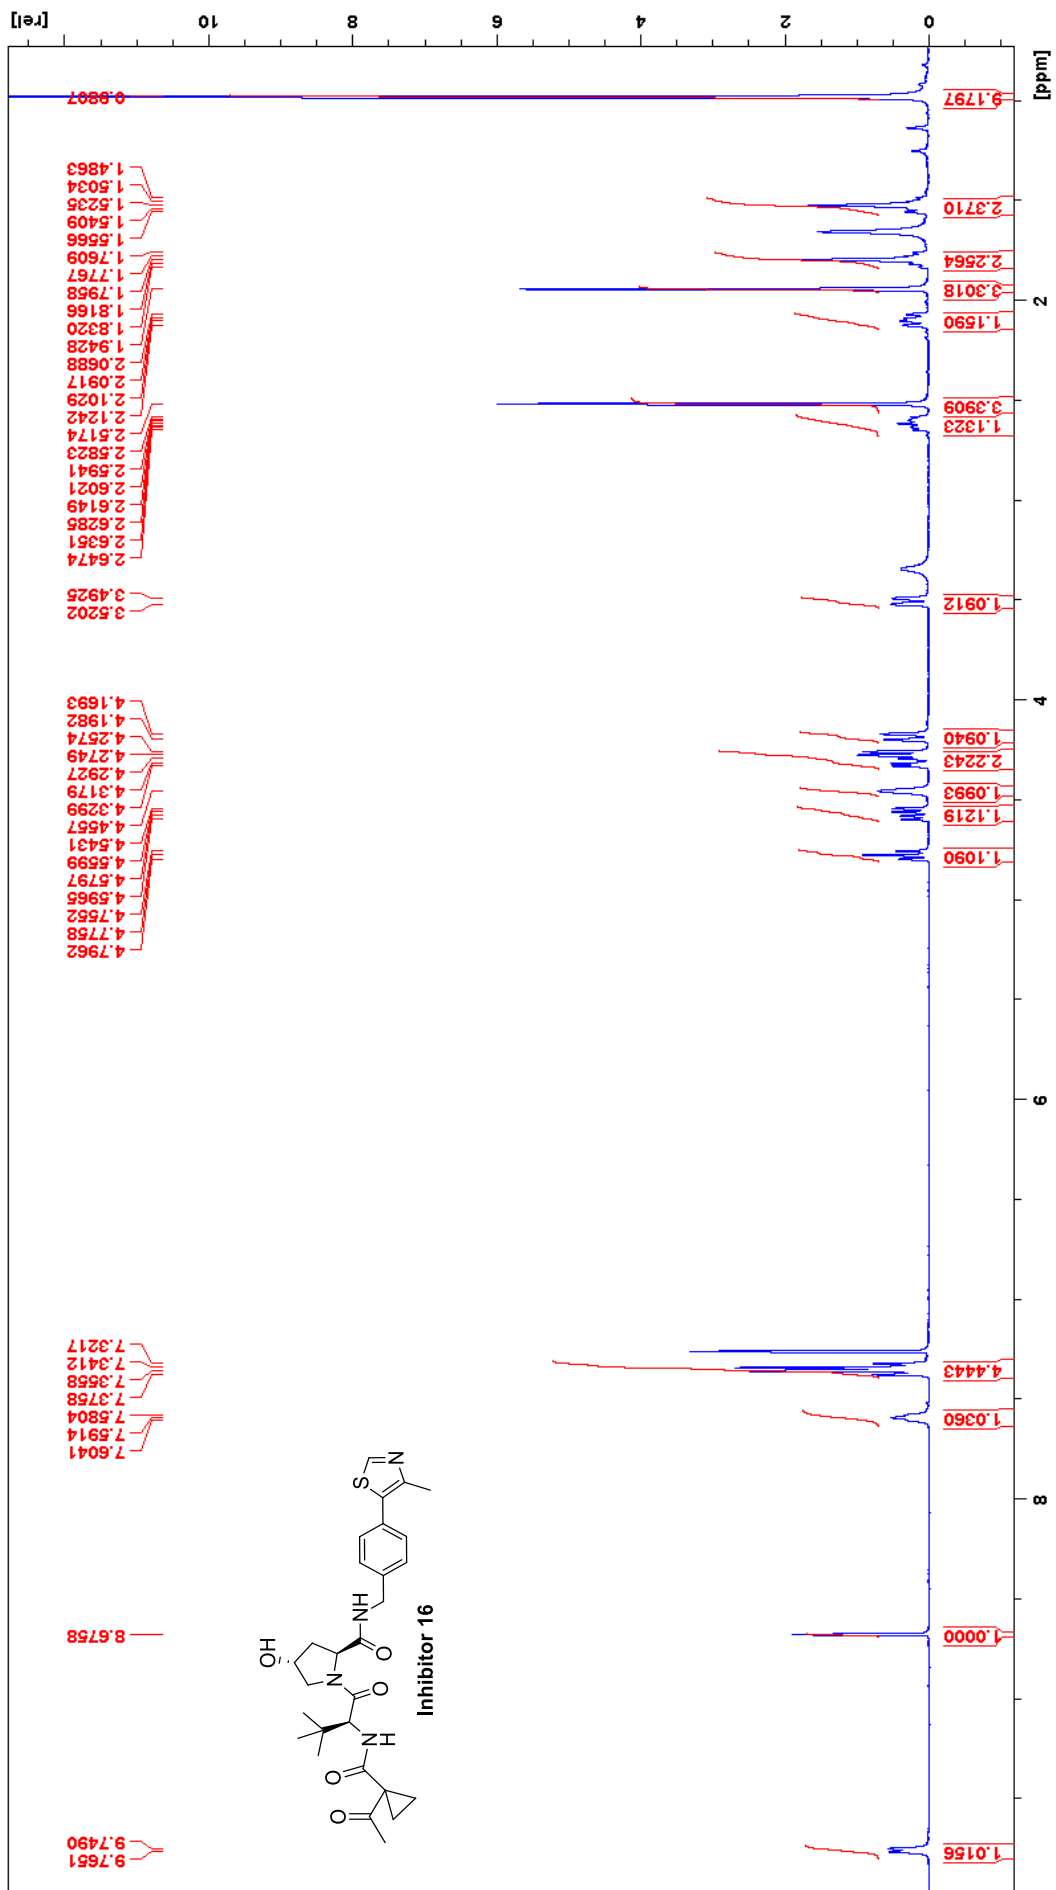

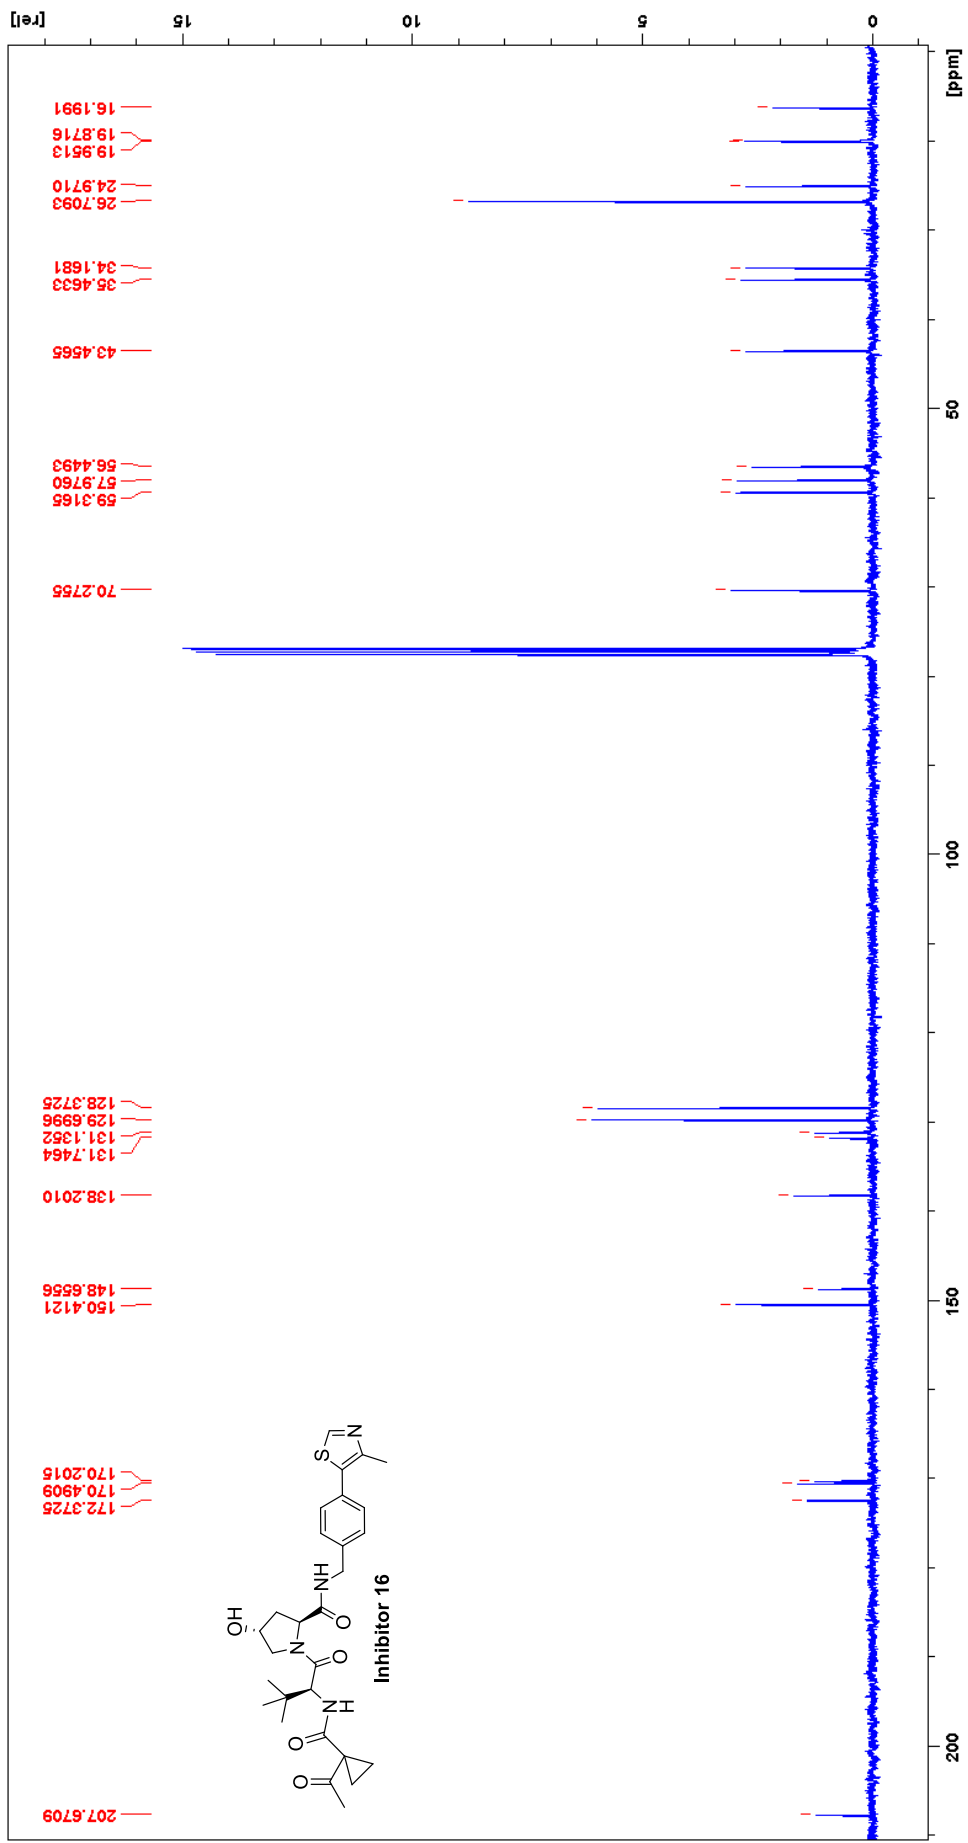

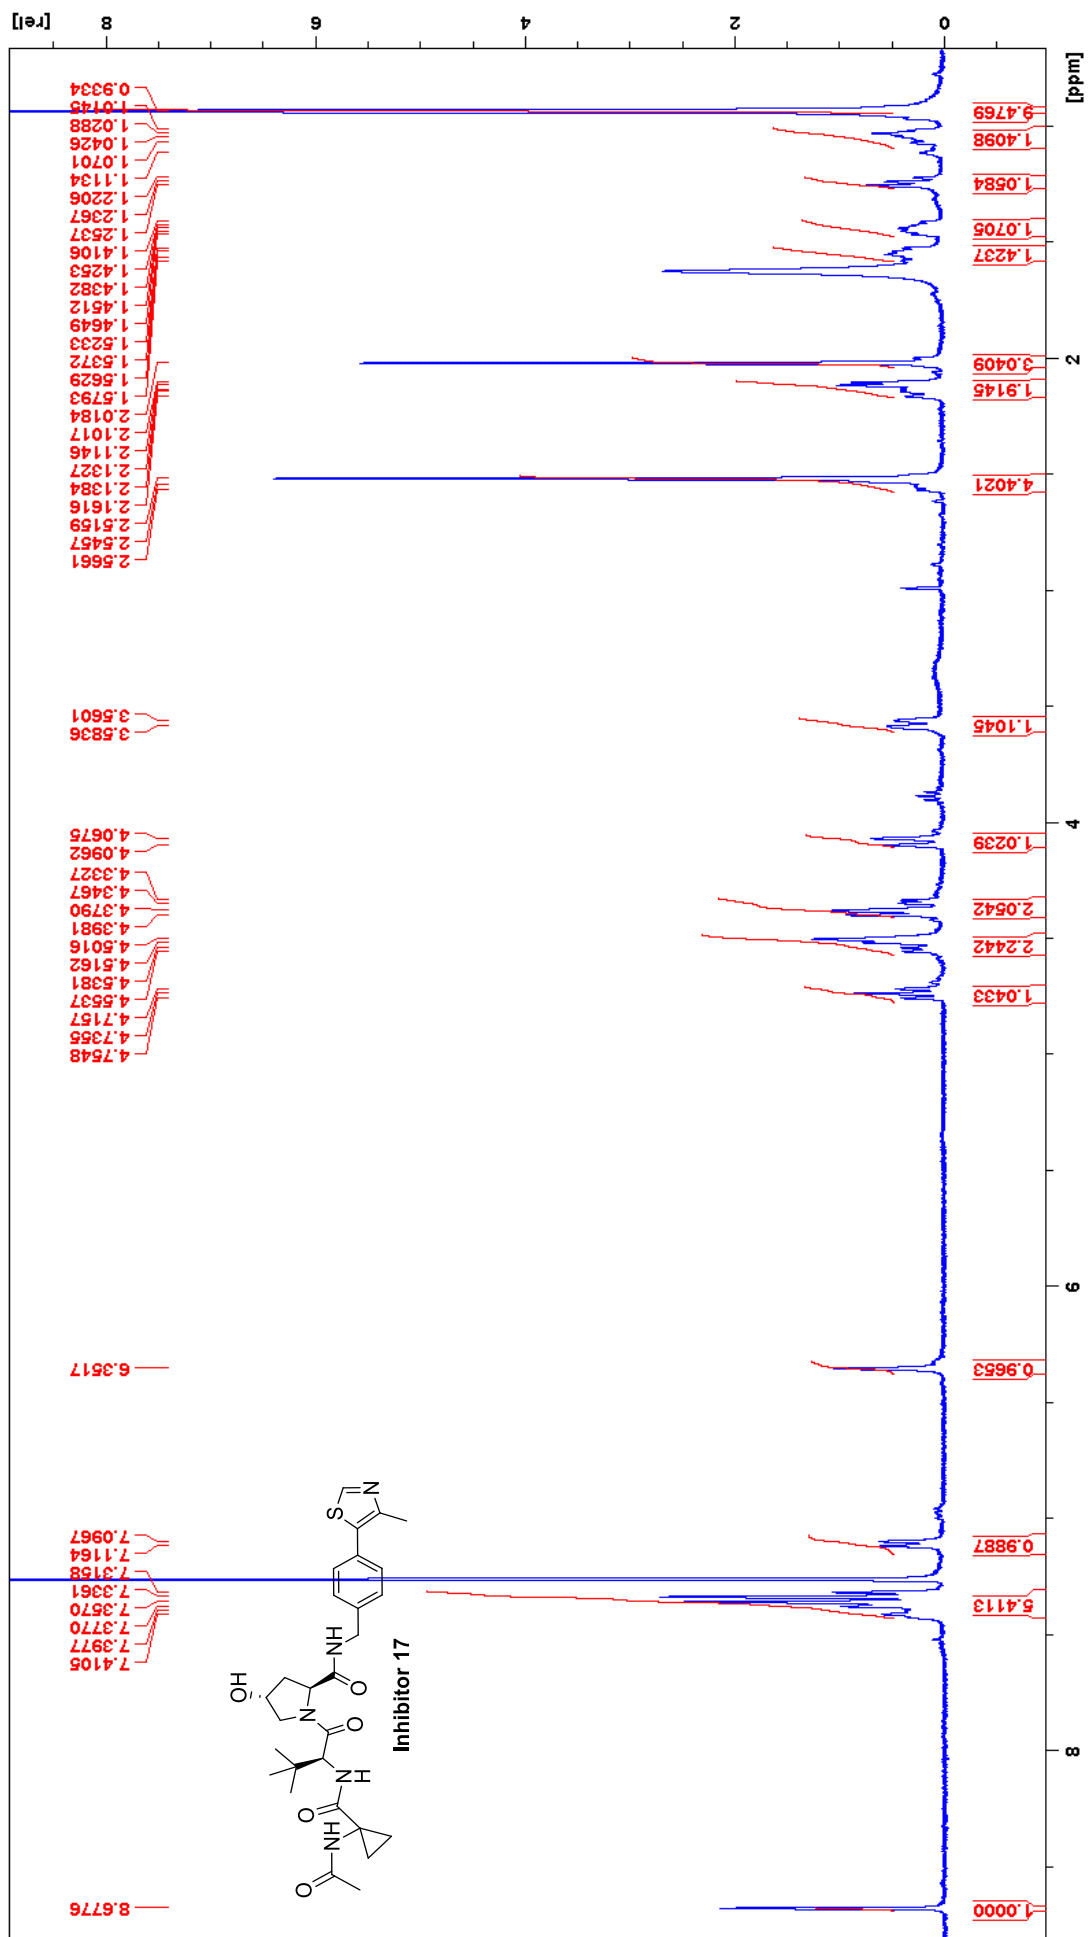

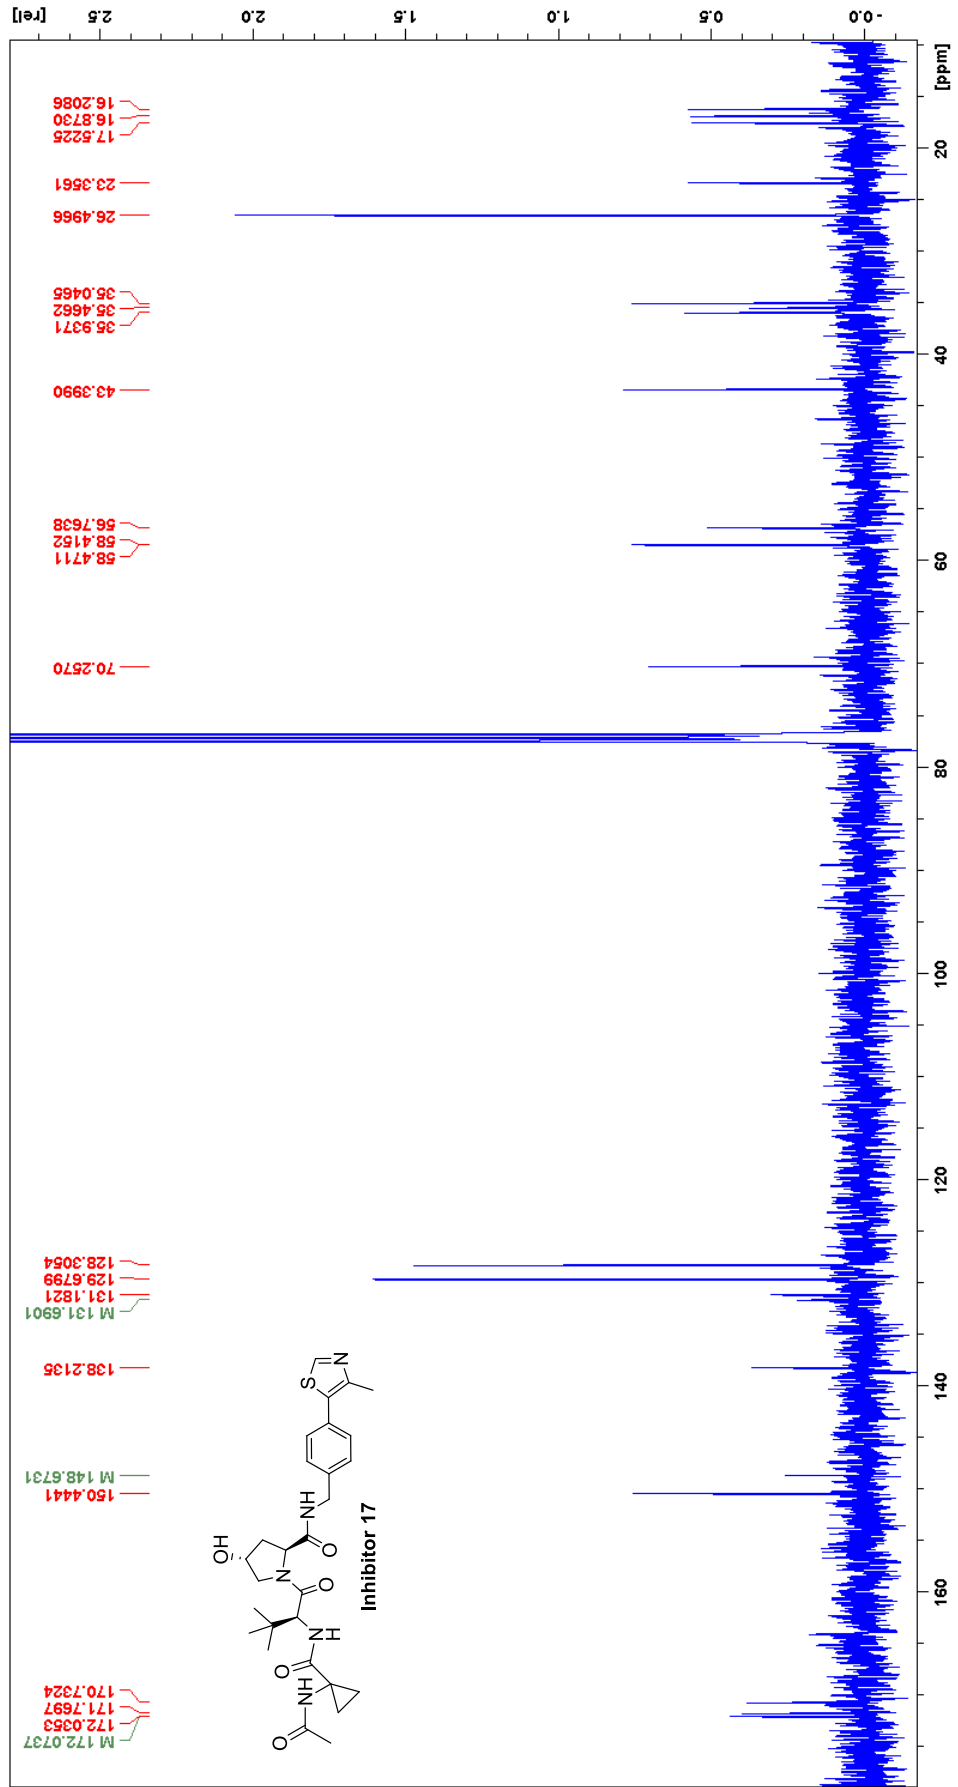

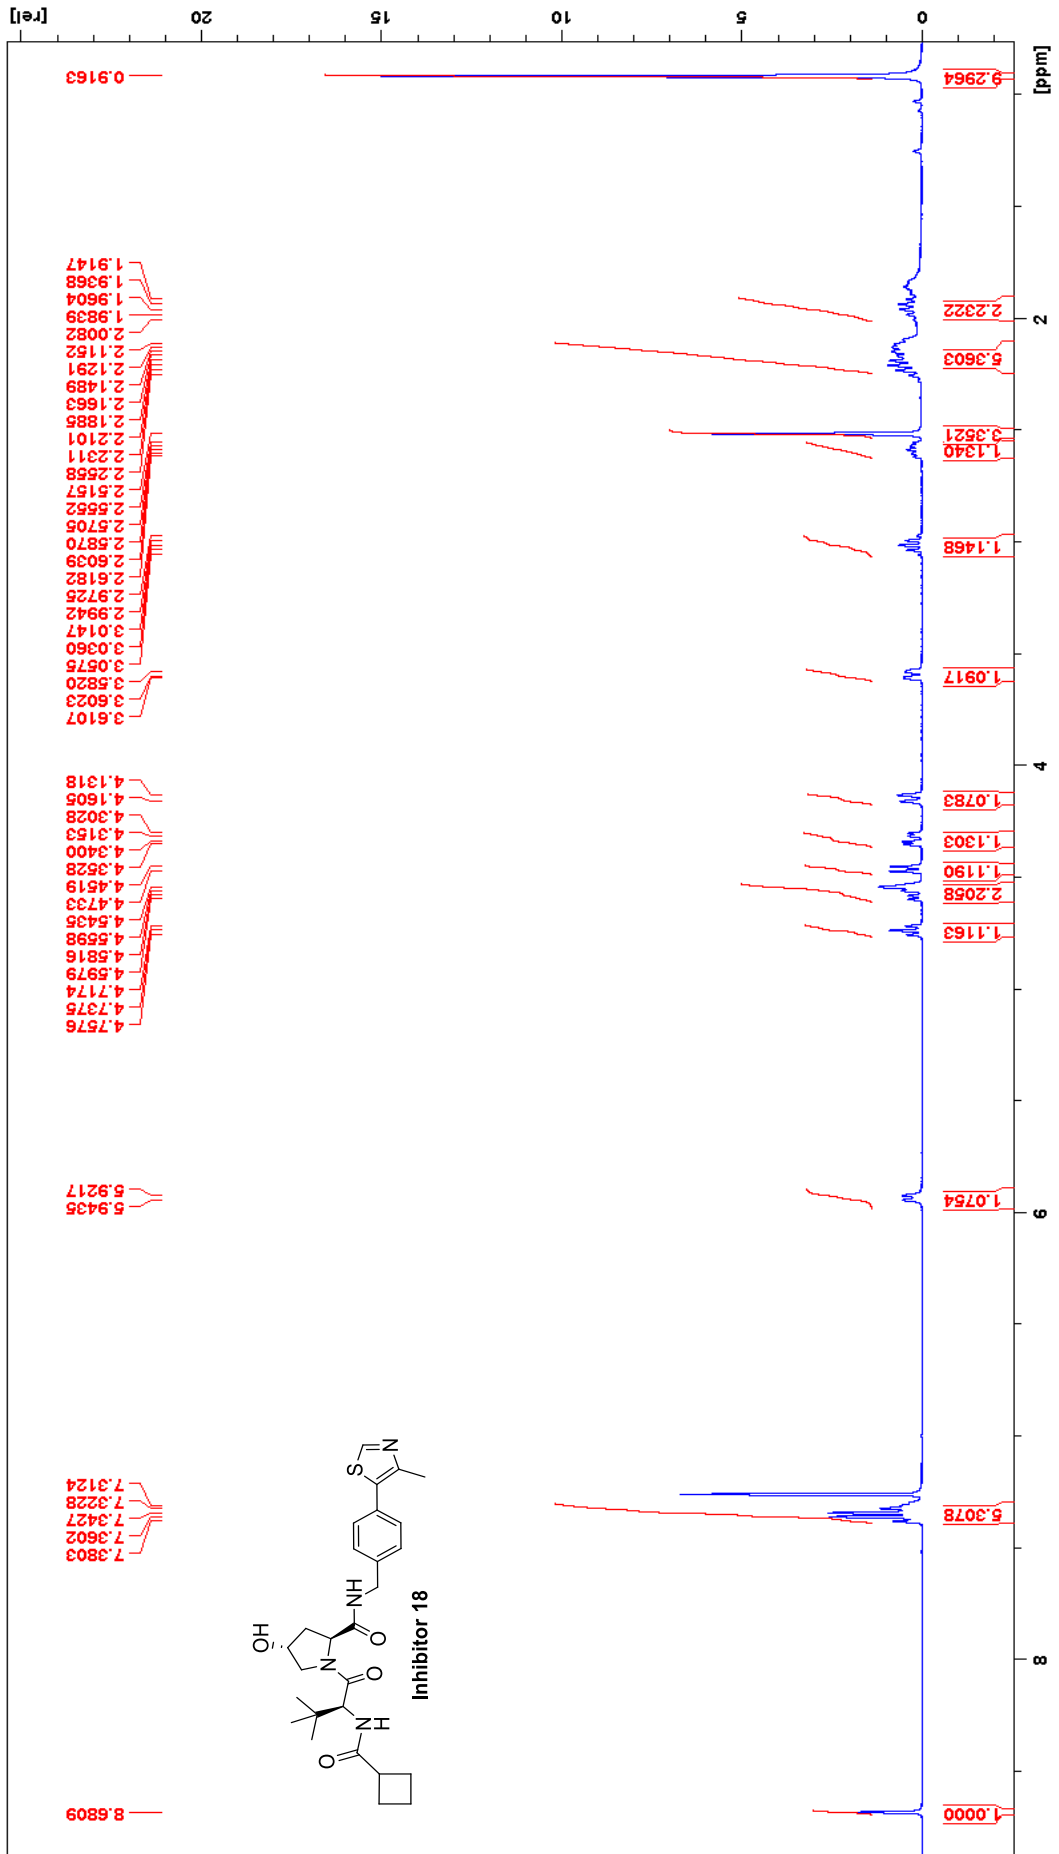

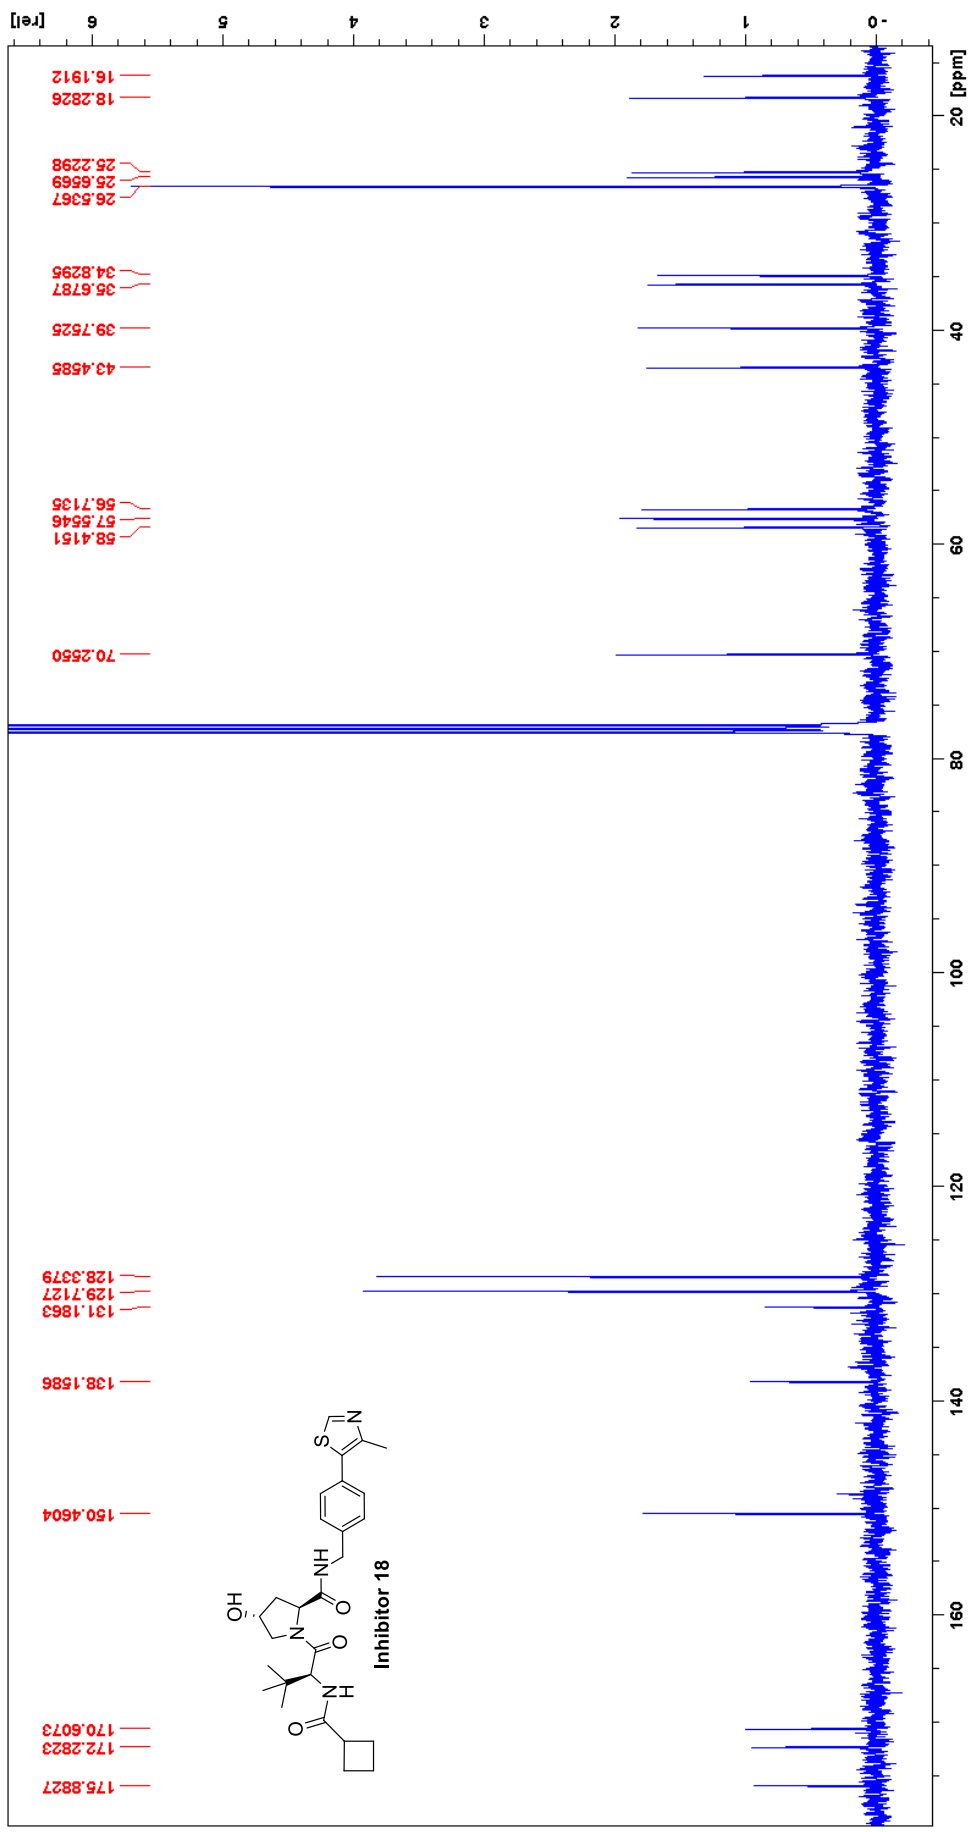

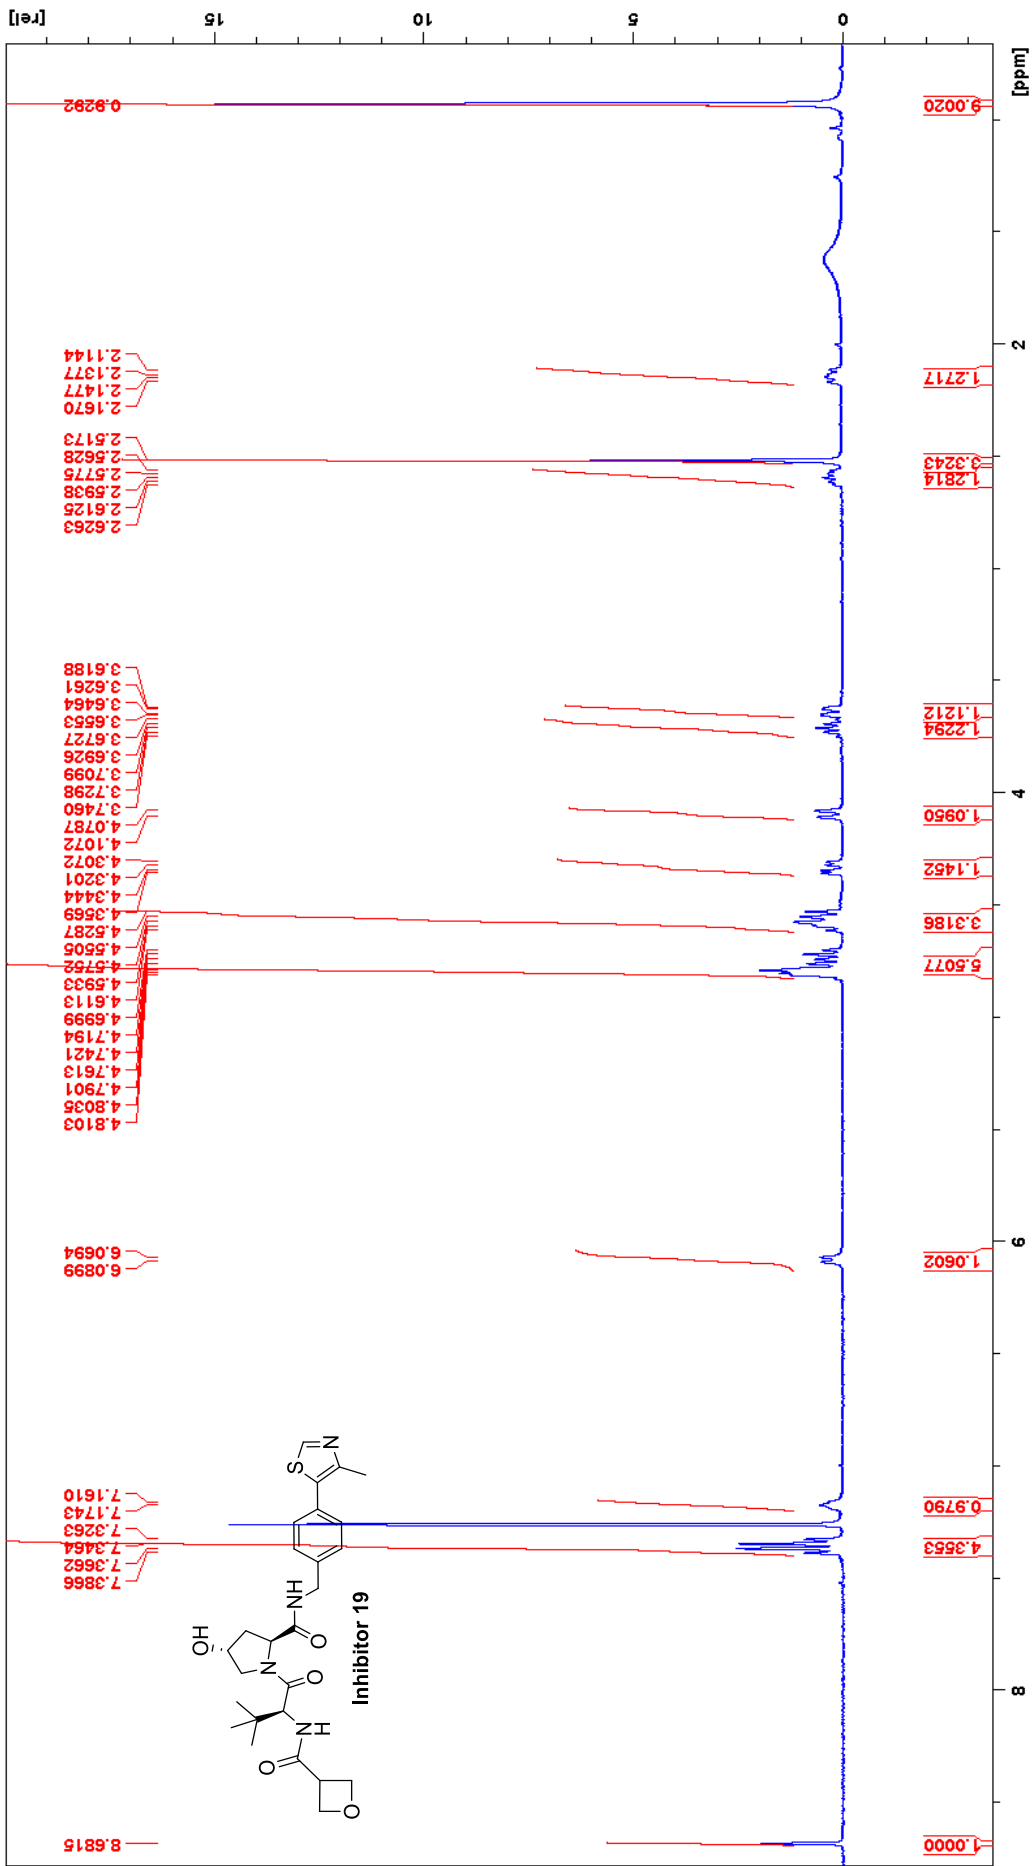

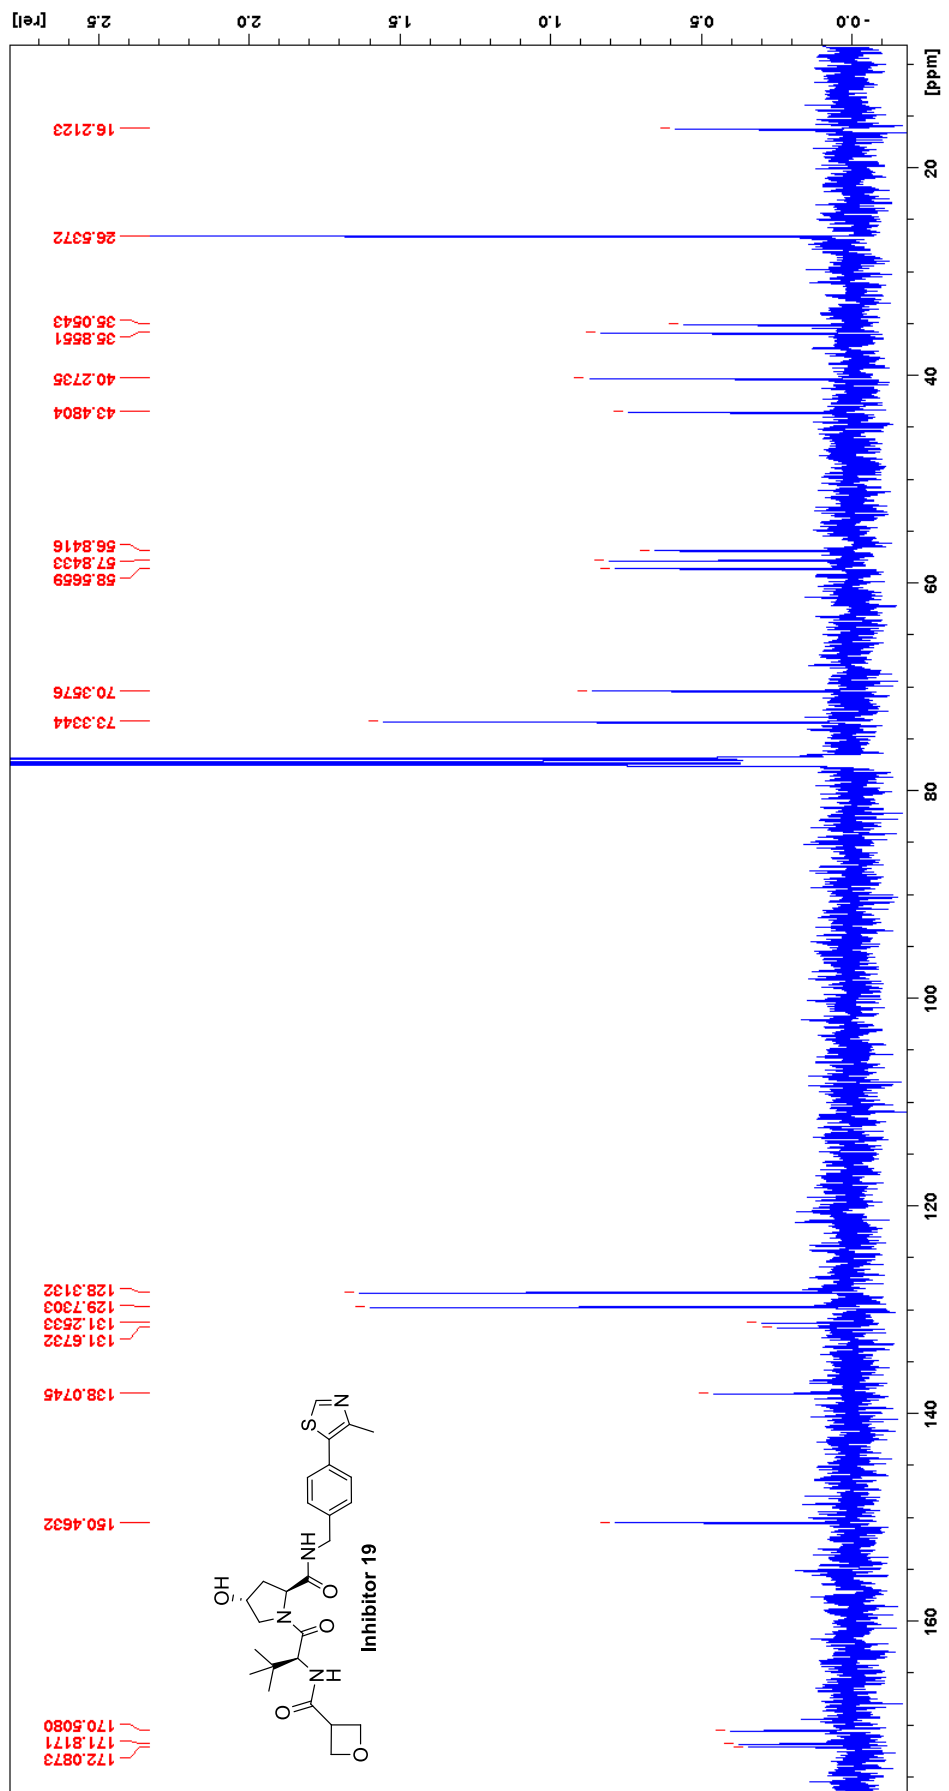



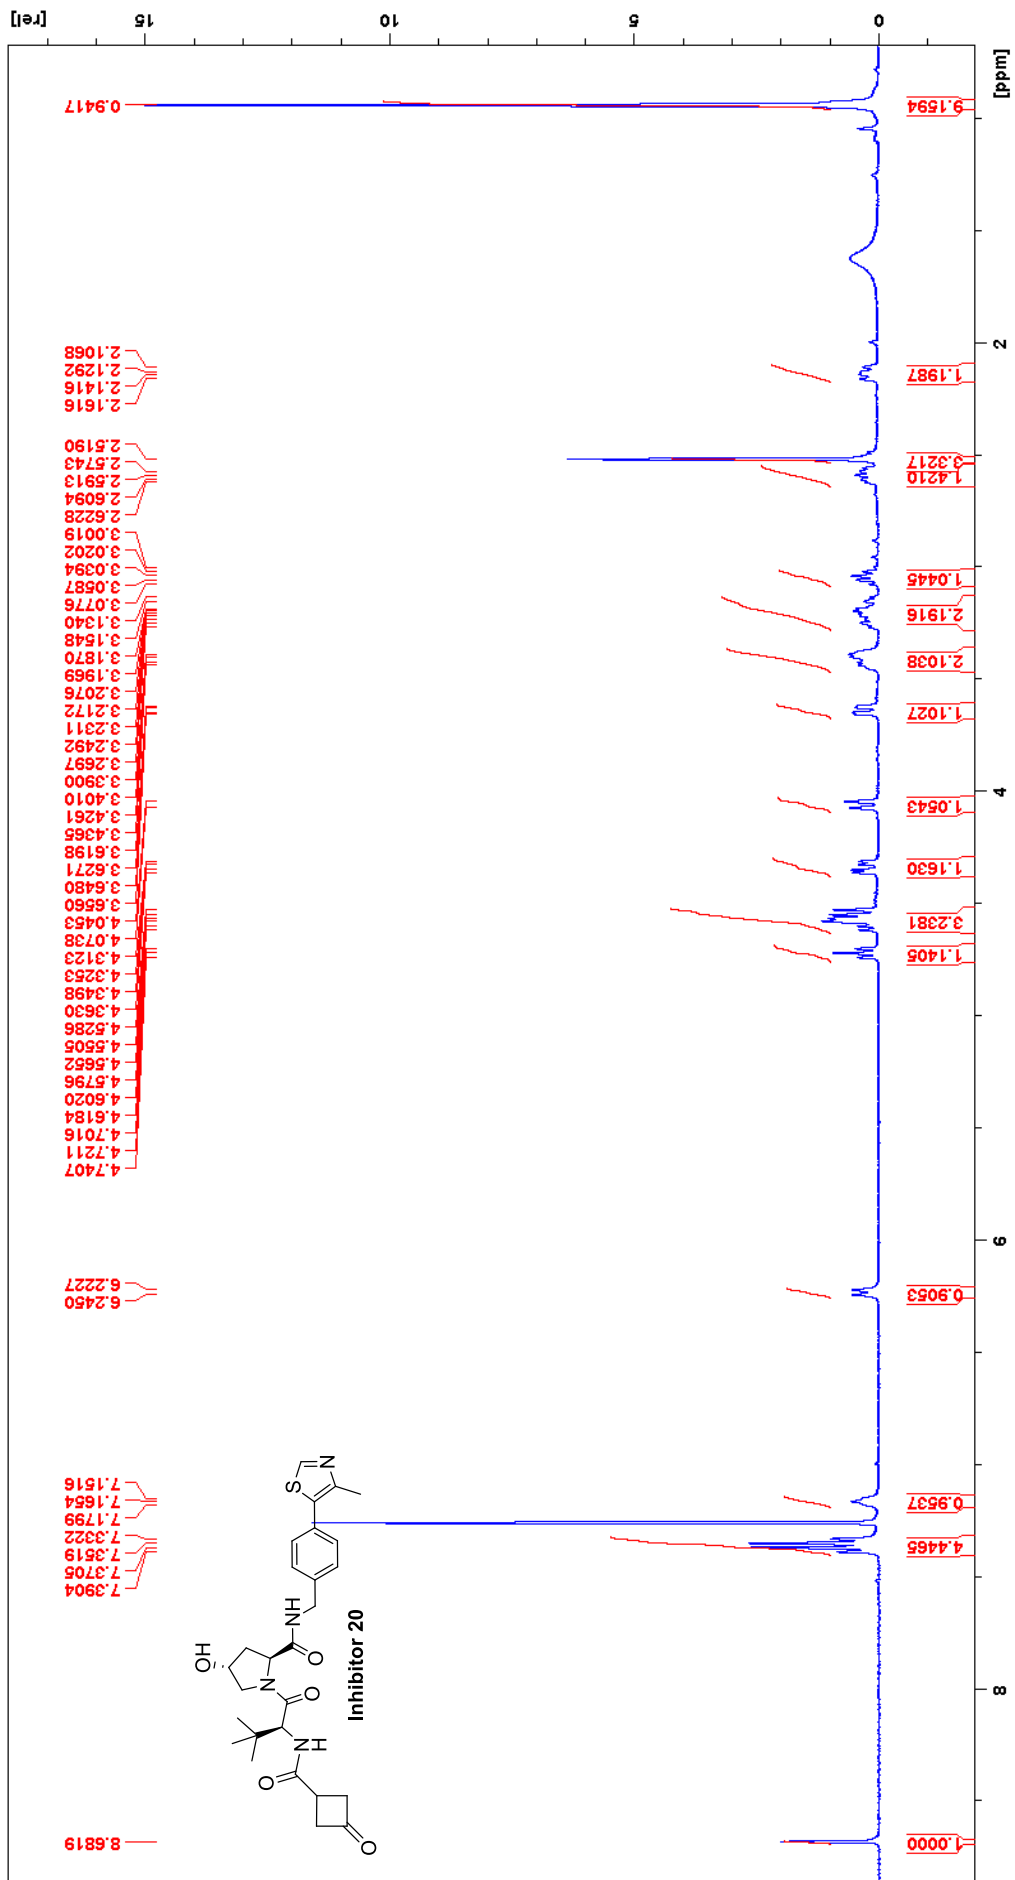

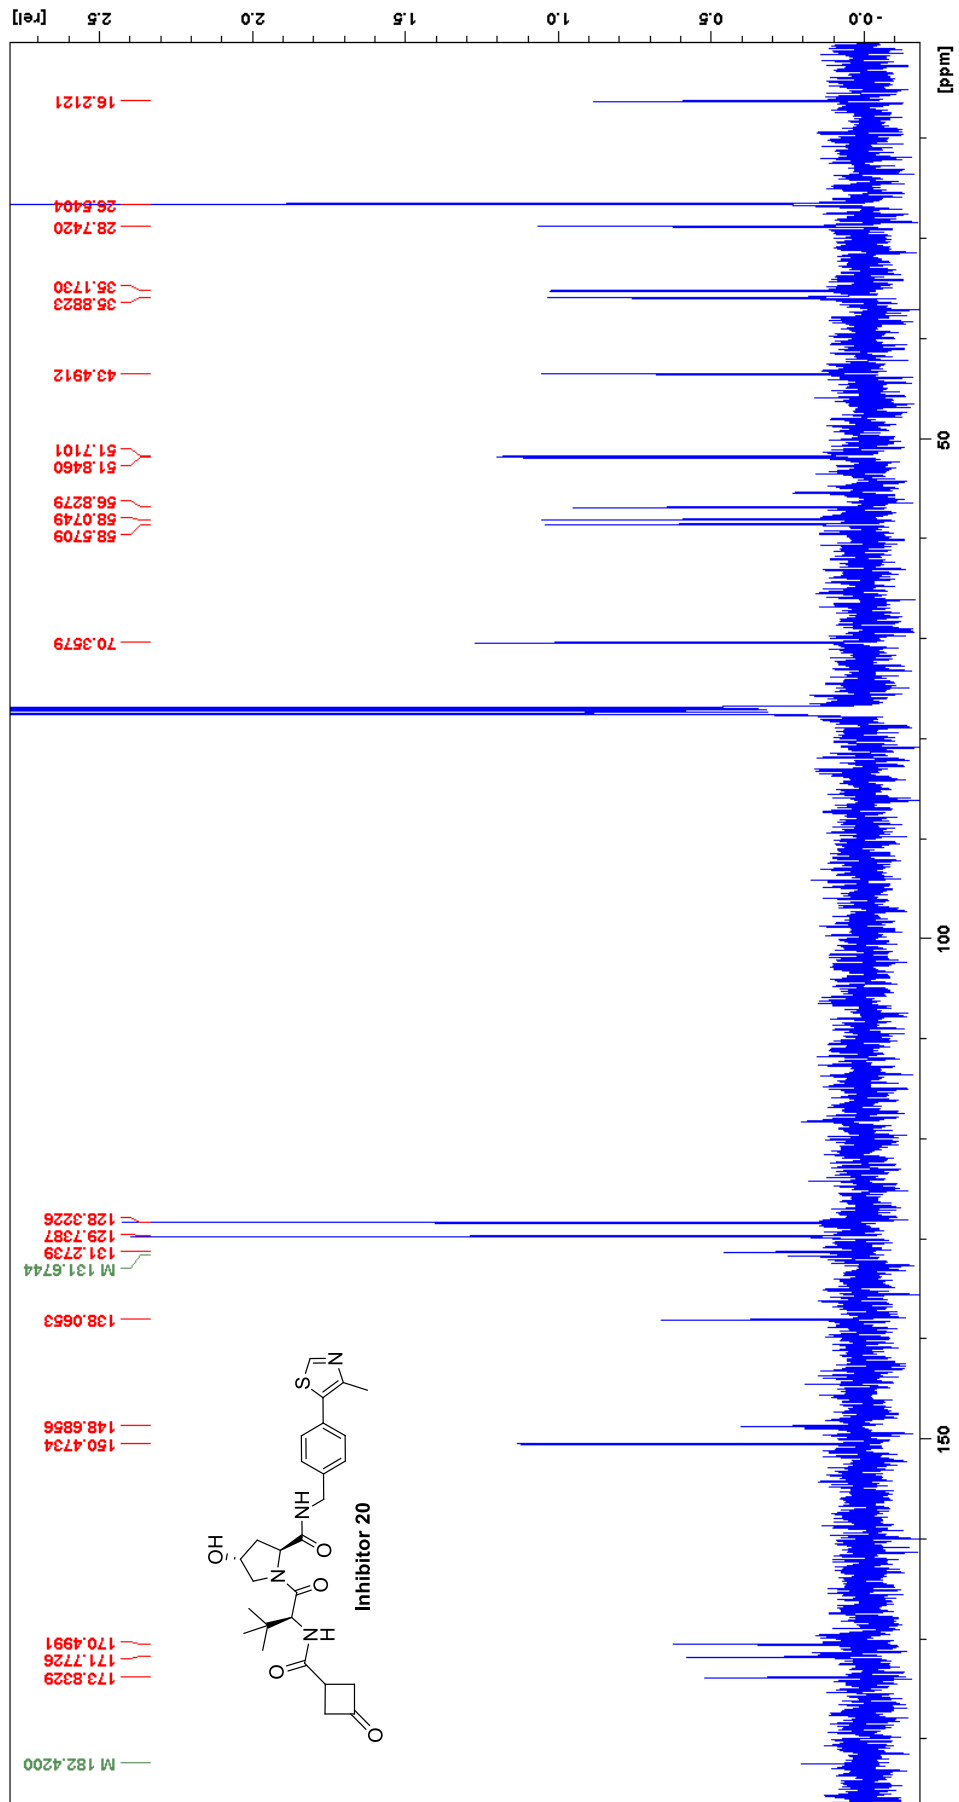



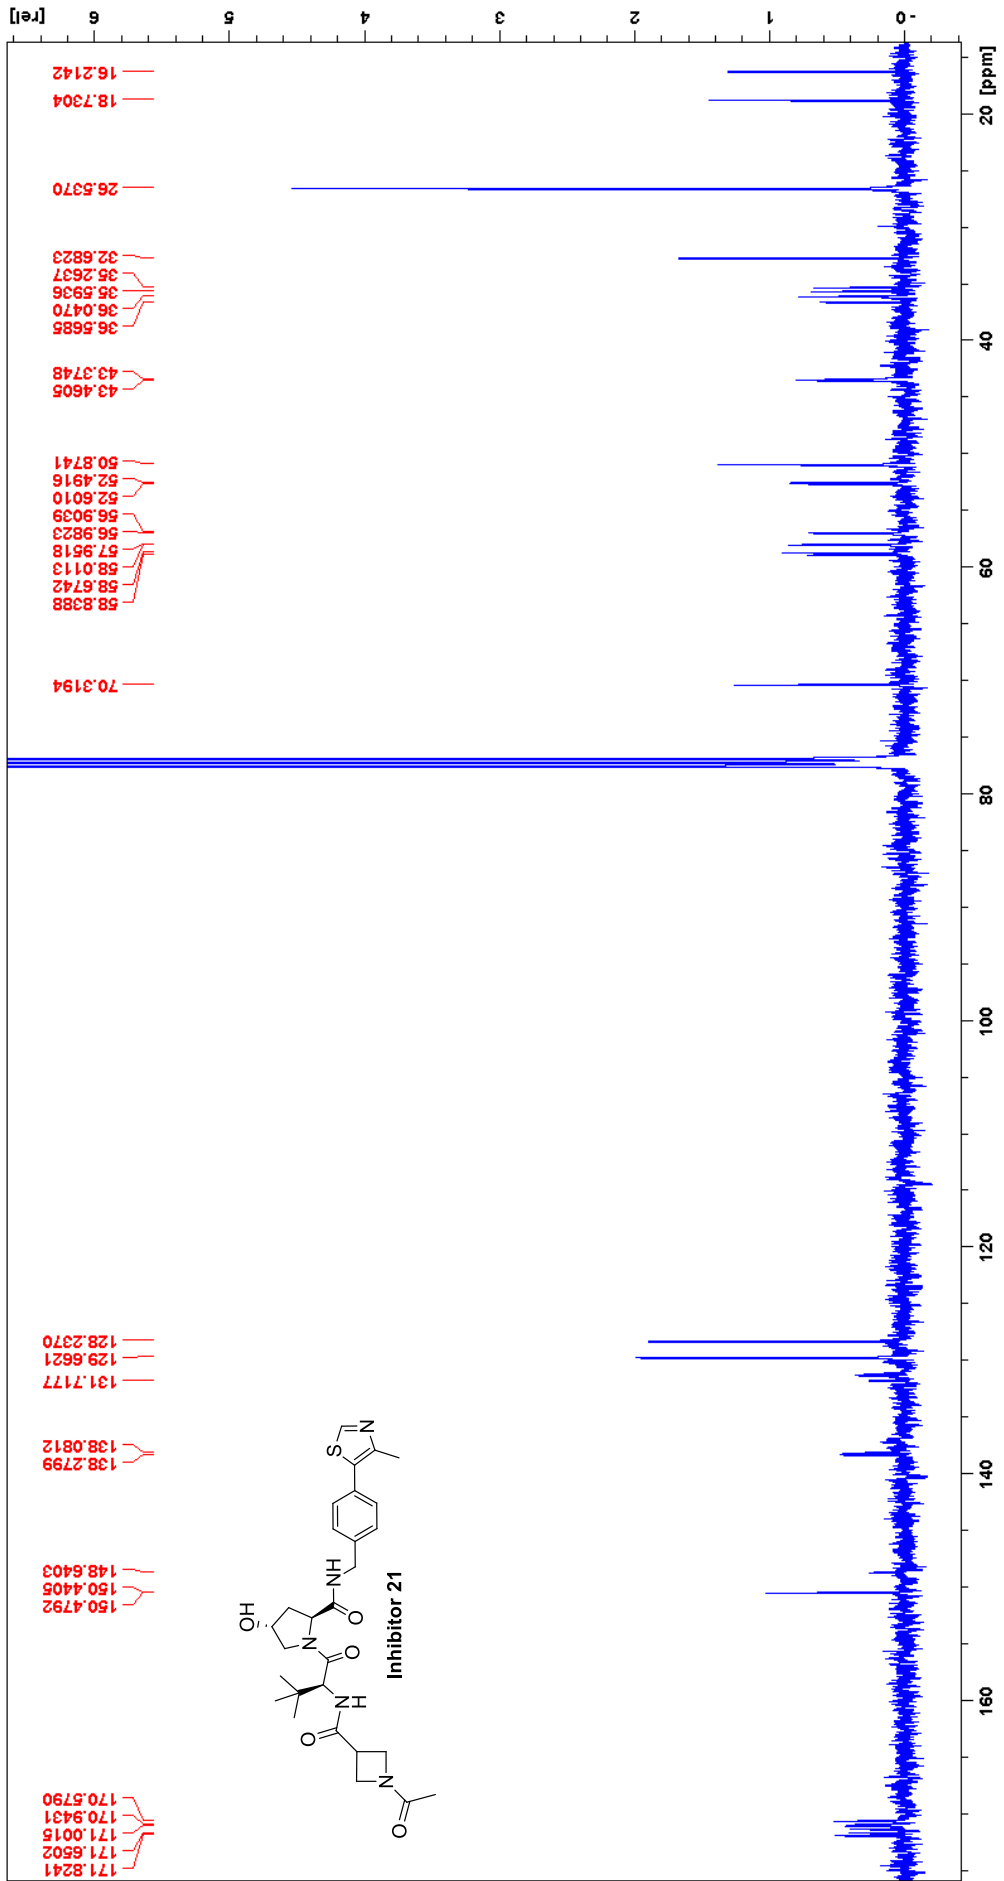

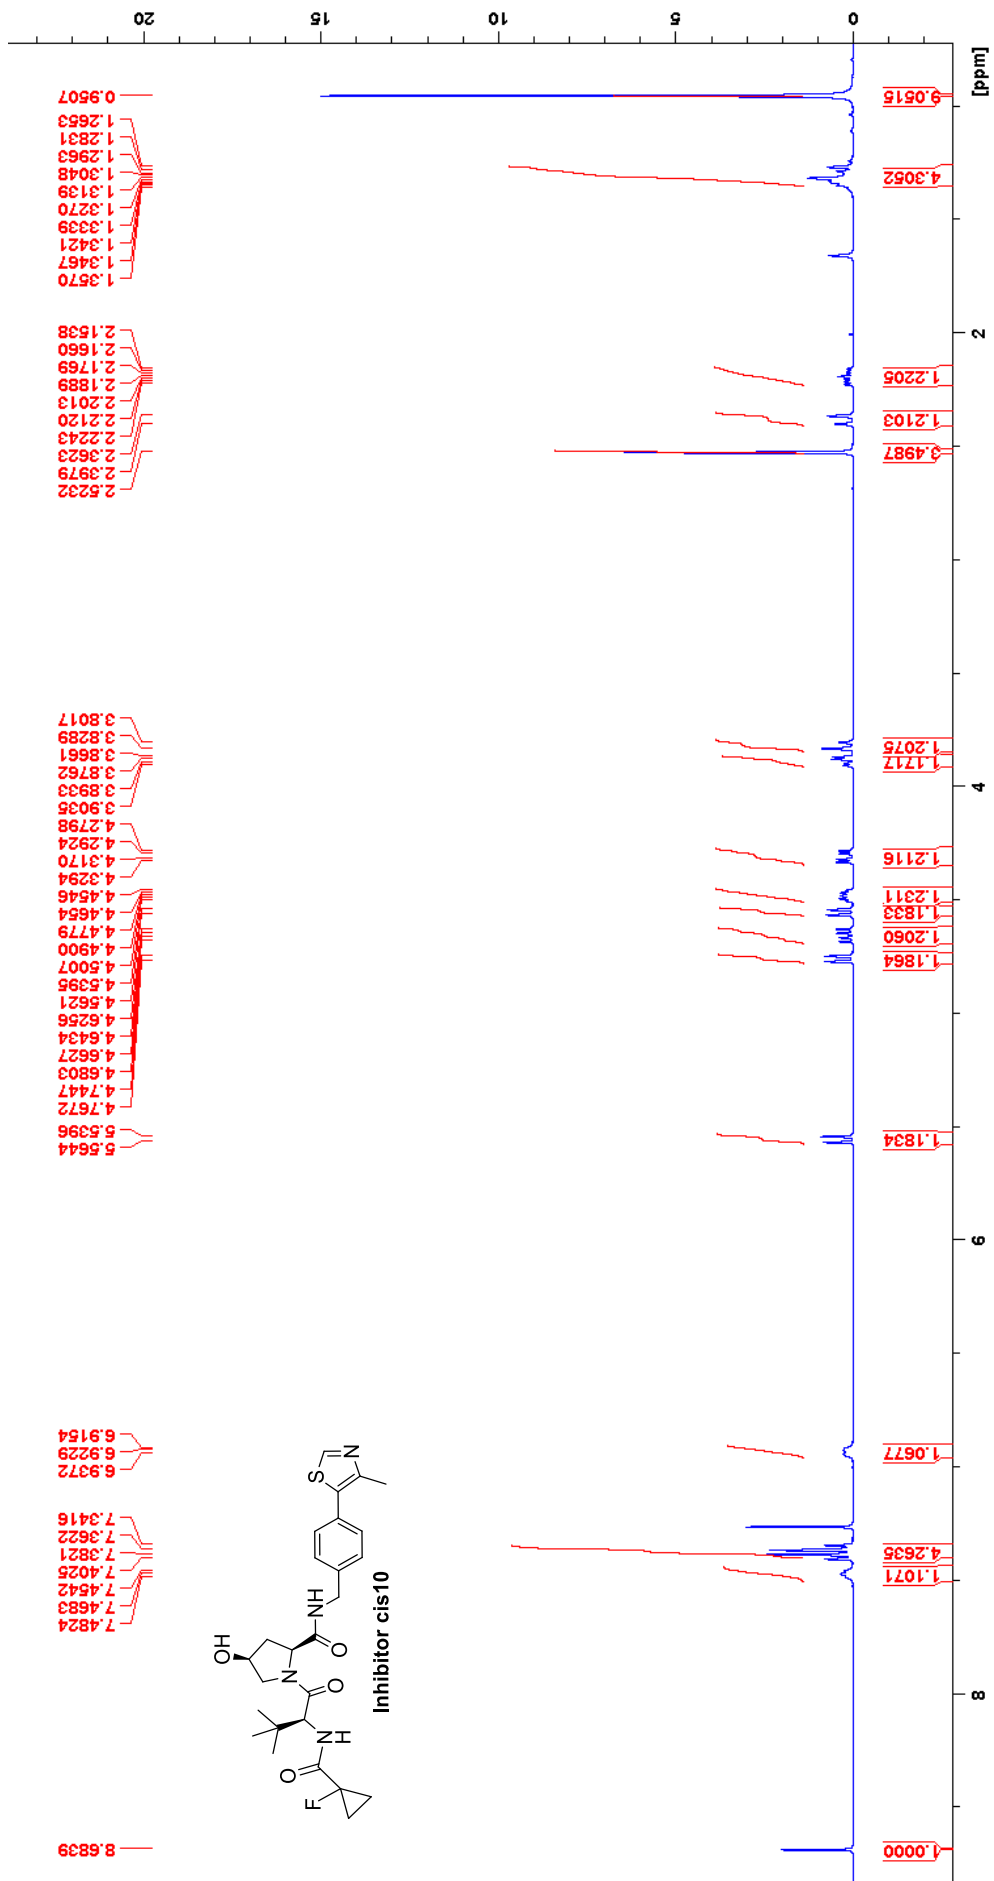

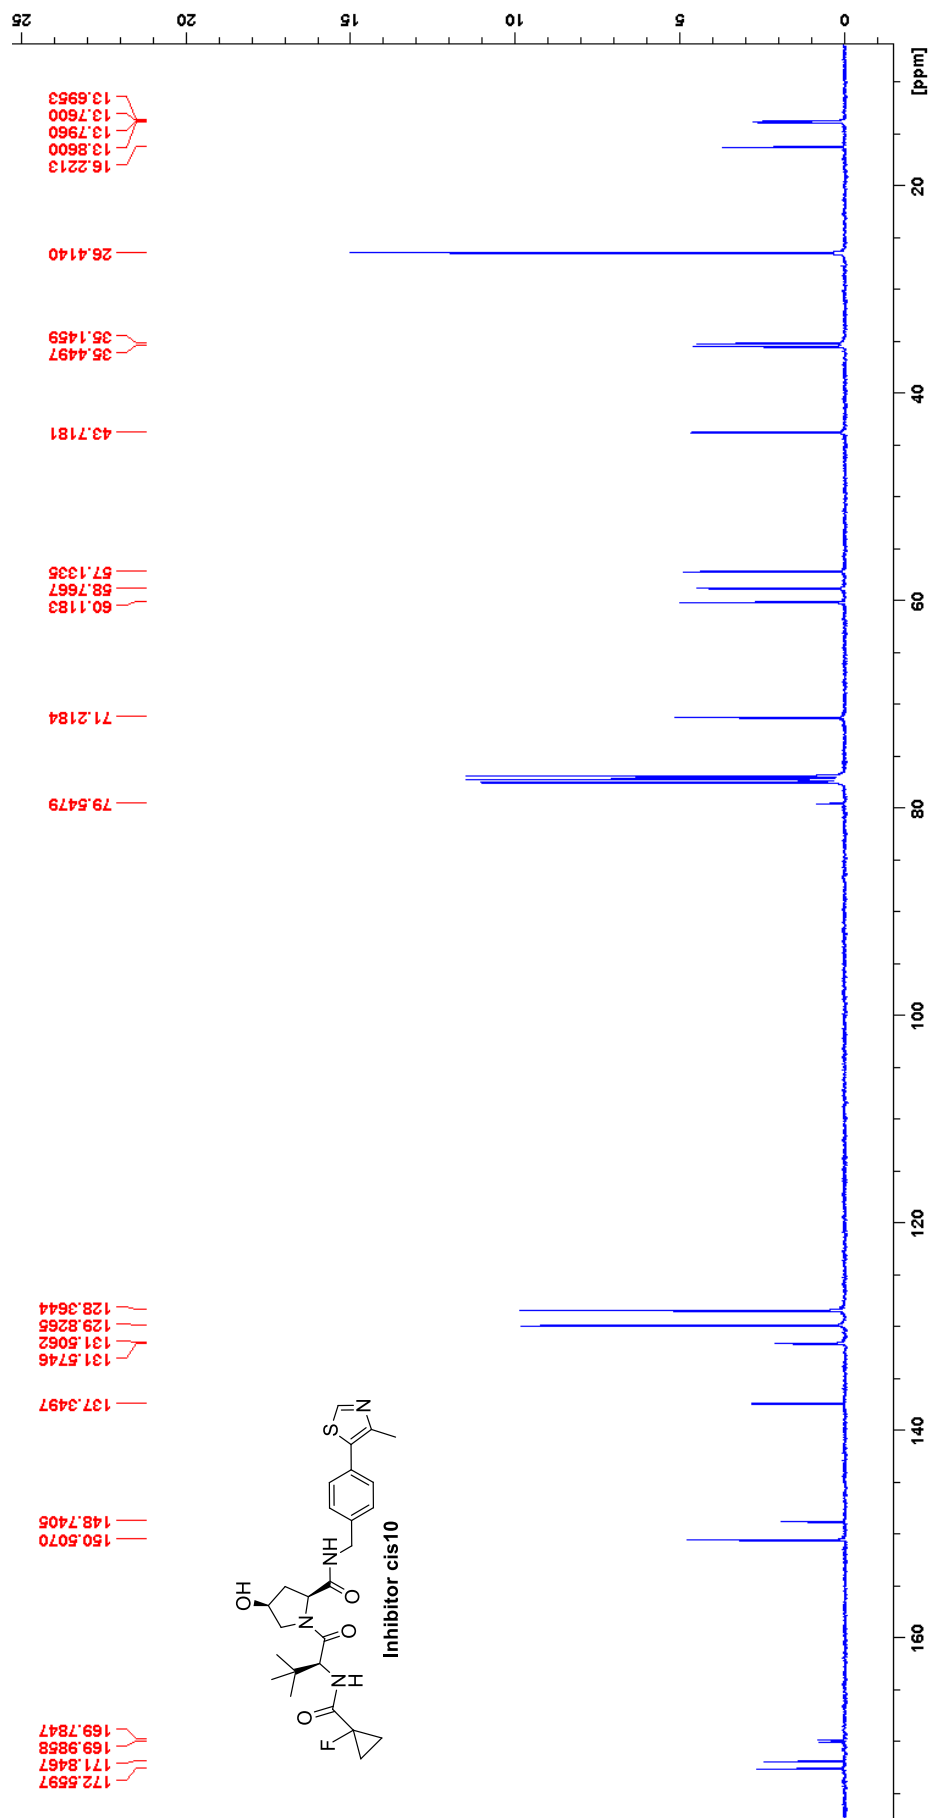

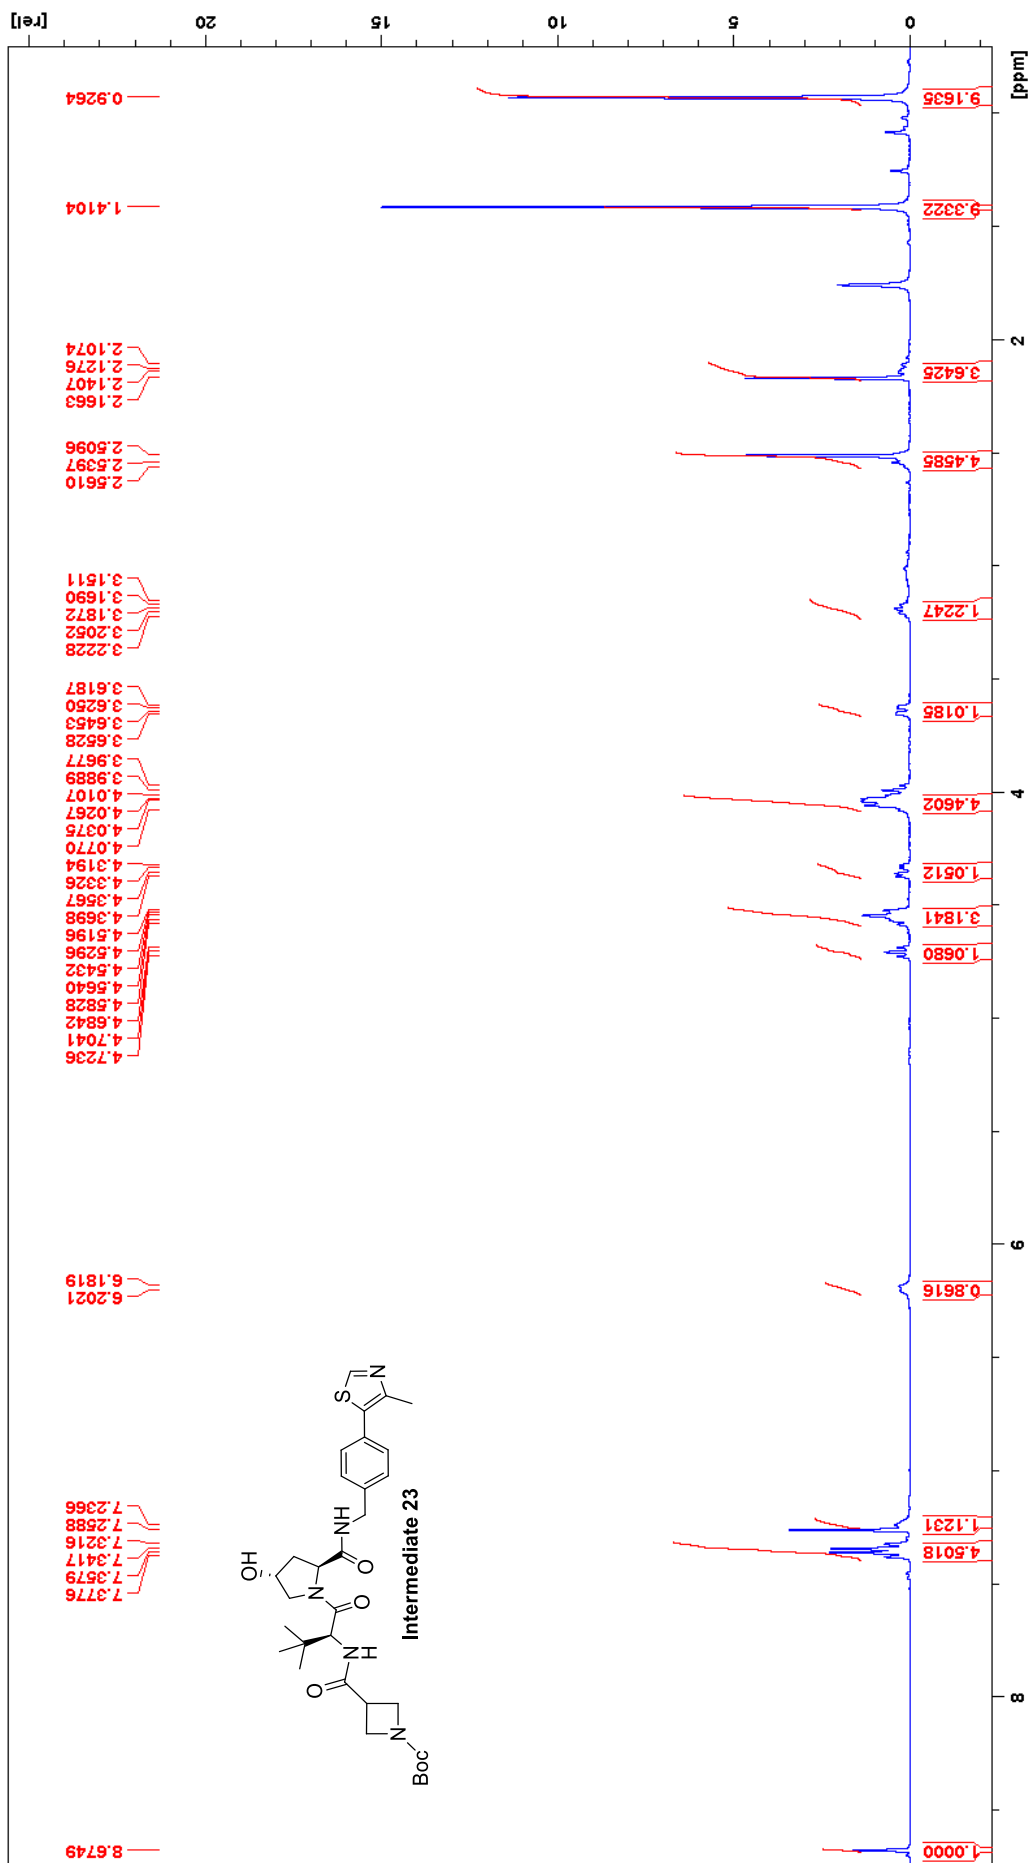

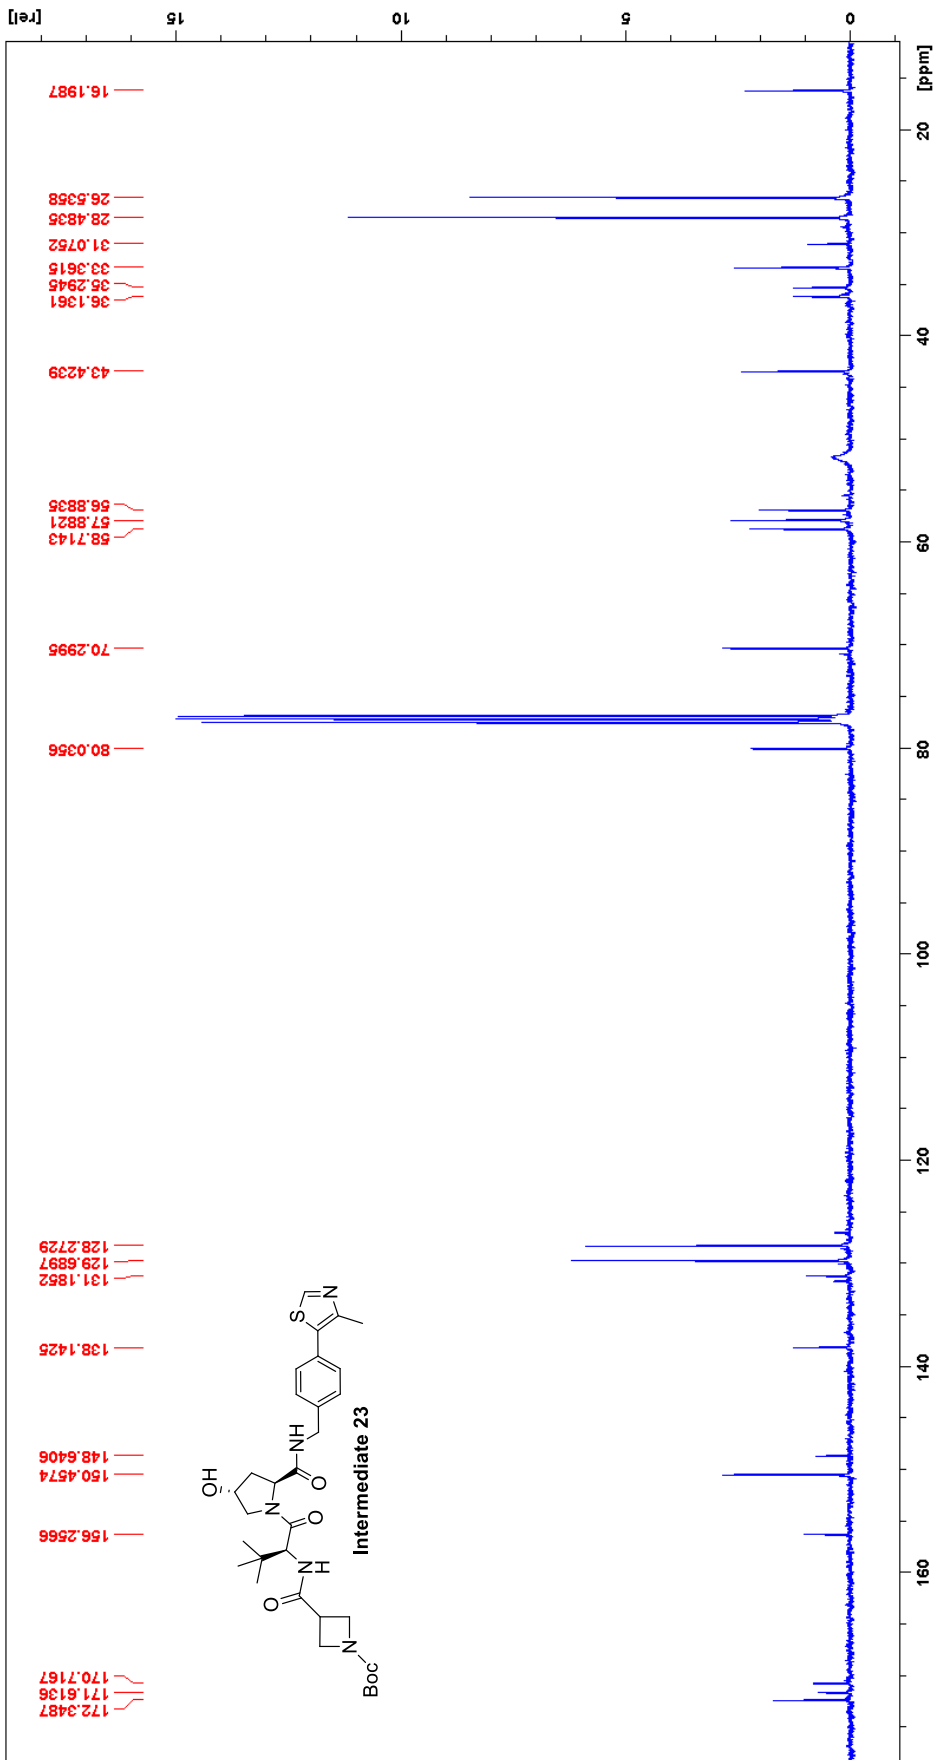





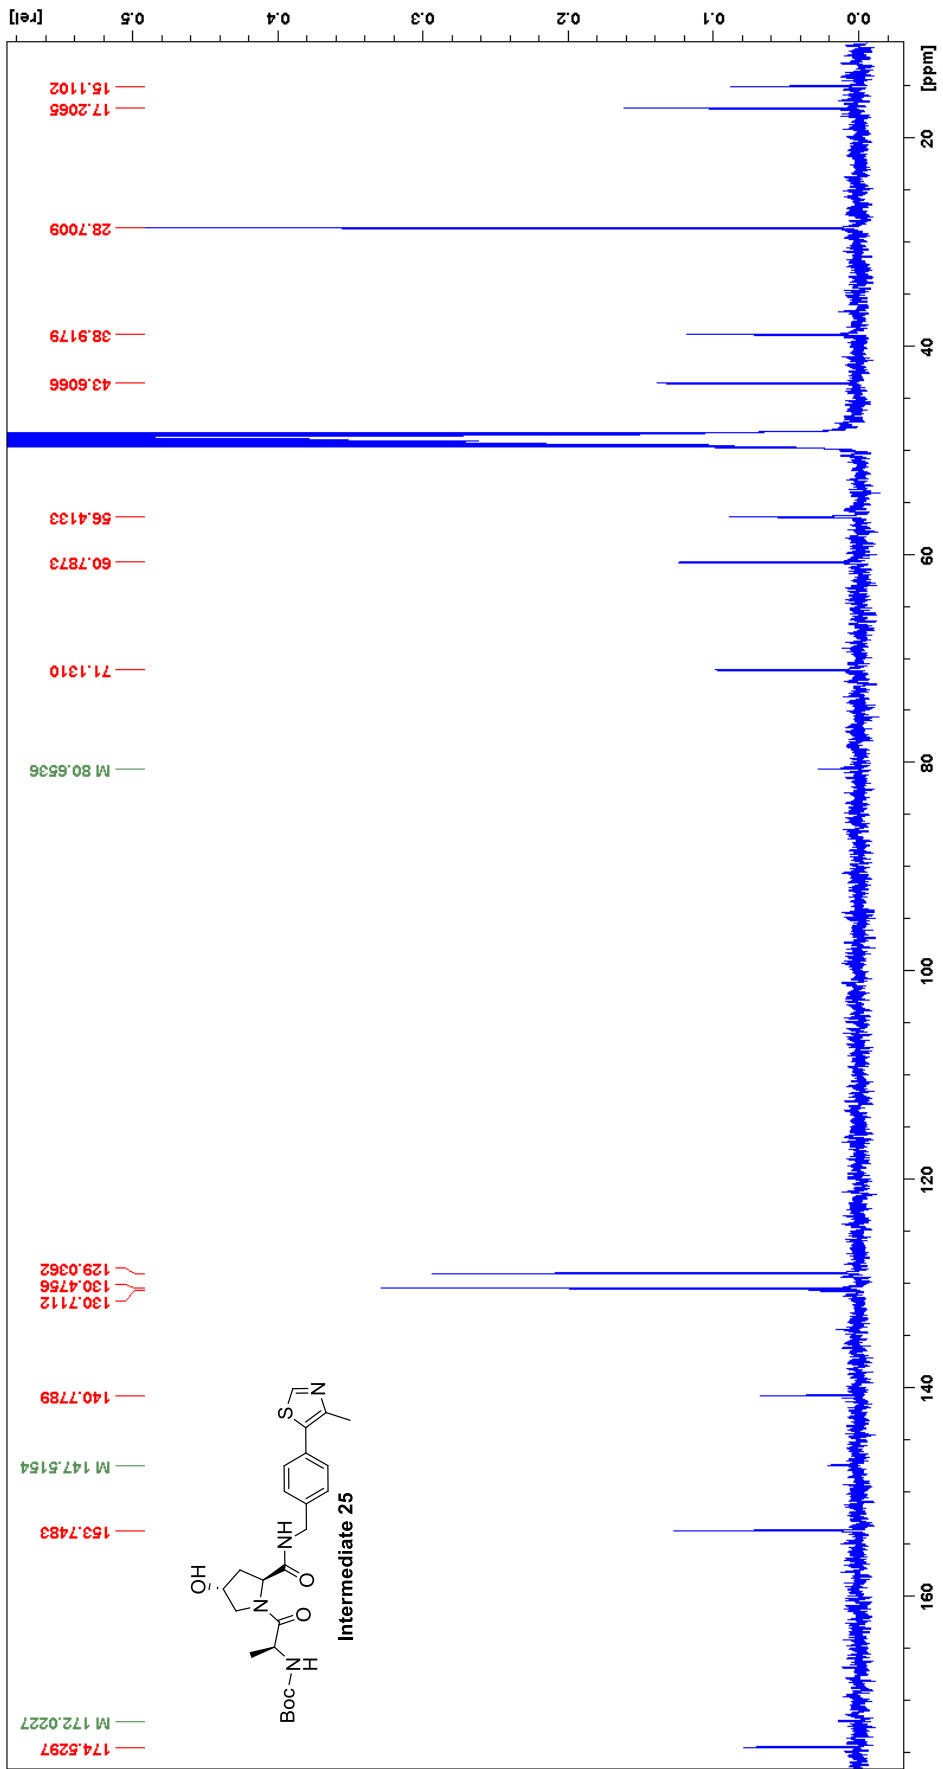

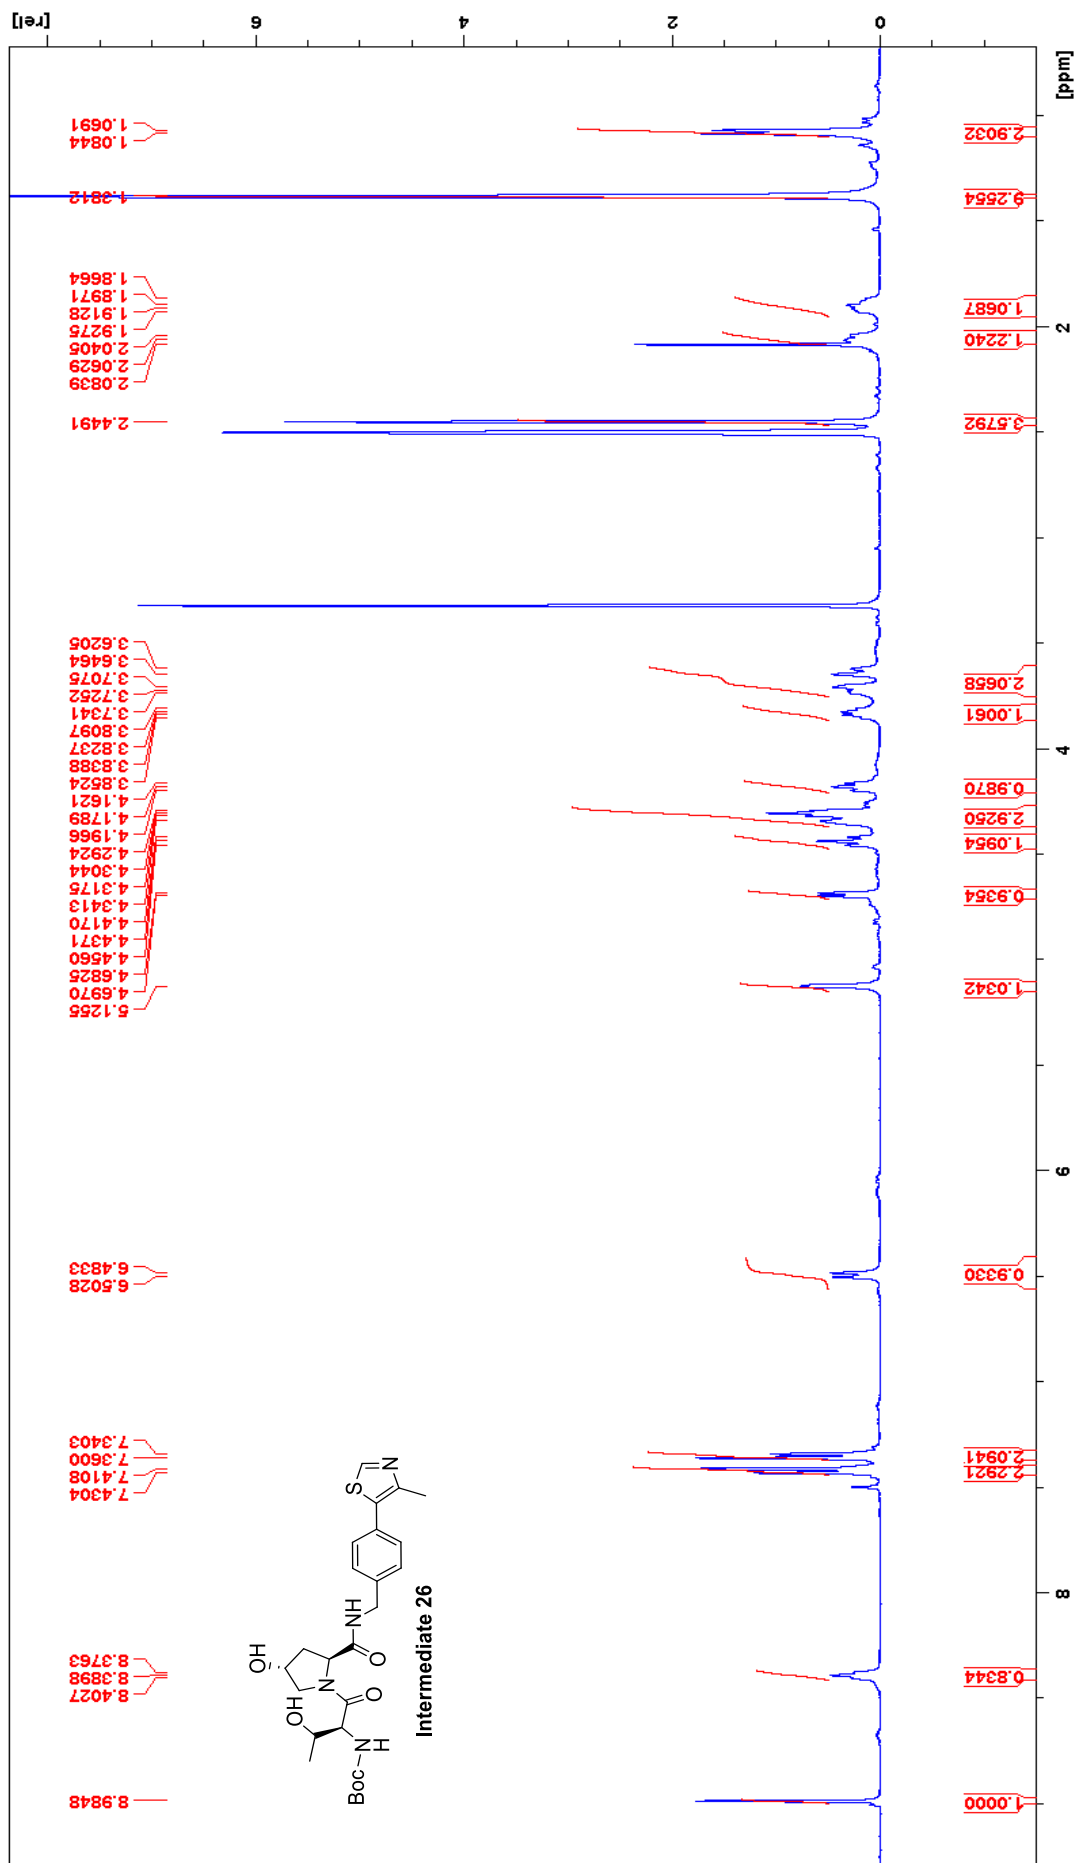

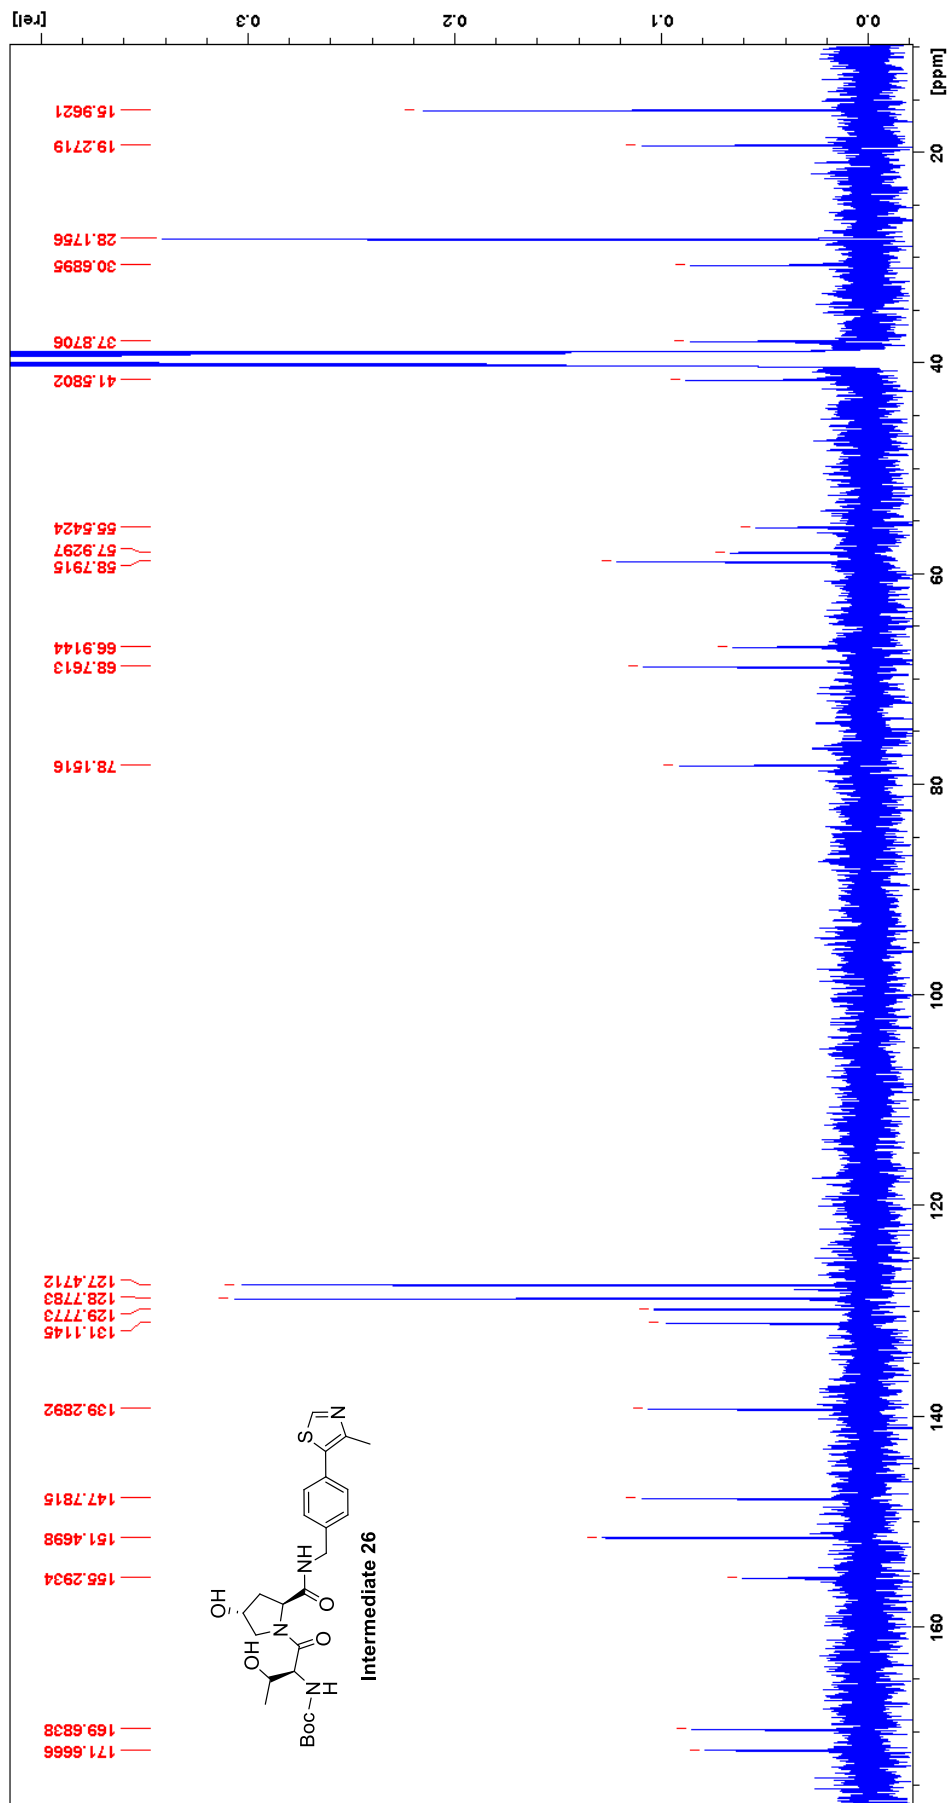

Supplement: jm7b00675_si_001.pdf [file jm7b00675_si_001.pdf]
